# Supplementary material for: A Risk Signature with Nine Stemness Index-Associated Genes for Predicting Survival of Patients with Uterine Corpus Endometrial Carcinoma
Source: Hindawi journal article supplement (doi:10.1155/2021/6653247), 2021-03-06
Supplement: f1 [file 6653247.f1.zip]

Supplementary Table1 All genes in the brown module

| probes   | module | Cc       | GS.mRNA  | p.GS.mRNA | GS.ERE   | p.GS.ERE | MMbrown  | p.MMbrown |
|----------|--------|----------|----------|-----------|----------|----------|----------|-----------|
| A4GALT   | brown  | -0.42264 | 1.96E-22 | -0.09848  | 0.030122 | -0.48983 | 1.24E-30 |           |
| AACS     | brown  | -0.07851 | 0.084134 | -0.11262  | 0.013074 | -0.31915 | 6.04E-13 |           |
| ABCA7    | brown  | -0.28257 | 2.35E-10 | -0.15448  | 0.000641 | -0.47131 | 3.45E-28 |           |
| ABCC8    | brown  | -0.22511 | 5.47E-07 | -0.15681  | 0.000528 | -0.26377 | 3.67E-09 |           |
| ABHD3    | brown  | 0.30571  | 5.96E-12 | 0.191731  | 2.13E-05 | 0.327943 | 1.27E-13 |           |
| ACADM    | brown  | 0.306139 | 5.55E-12 | 0.314258  | 1.41E-12 | 0.406049 | 1.12E-20 |           |
| ACAT2    | brown  | 0.477386 | 5.64E-29 | 0.235468  | 1.55E-07 | 0.531094 | 1.20E-36 |           |
| ACE      | brown  | -0.27446 | 7.89E-10 | -0.14539  | 0.001324 | -0.39096 | 3.67E-19 |           |
| ACRV1    | brown  | 0.458447 | 1.41E-26 | 0.143608  | 0.00152  | 0.551579 | 5.89E-40 |           |
| ACSBG2   | brown  | 0.222247 | 7.66E-07 | 0.005431  | 0.905042 | 0.285585 | 1.48E-10 |           |
| ACTG1    | brown  | 0.229262 | 3.32E-07 | 0.123816  | 0.006329 | 0.397859 | 7.62E-20 |           |
| ACTL8    | brown  | 0.507229 | 4.53E-33 | 0.192434  | 1.98E-05 | 0.499383 | 5.92E-32 |           |
| ACTRT3   | brown  | 0.342078 | 9.26E-15 | 0.142223  | 0.001689 | 0.339431 | 1.53E-14 |           |
| ACVR1C   | brown  | 0.293089 | 4.61E-11 | 0.170169  | 0.000166 | 0.356962 | 5.07E-16 |           |
| ADAMTS8  | brown  | -0.40875 | 5.89E-21 | -0.08958  | 0.048648 | -0.48495 | 5.63E-30 |           |
| ADCY4    | brown  | -0.41226 | 2.53E-21 | -0.23282  | 2.16E-07 | -0.49636 | 1.56E-31 |           |
| ADGRG6   | brown  | 0.203848 | 6.03E-06 | 0.210015  | 3.08E-06 | 0.266121 | 2.63E-09 |           |
| ADH1A    | brown  | -0.248   | 3.13E-08 | -0.10487  | 0.020895 | -0.26353 | 3.79E-09 |           |
| ADRA2A   | brown  | -0.42408 | 1.36E-22 | -0.11354  | 0.012348 | -0.443   | 9.92E-25 |           |
| AGFG2    | brown  | -0.15007 | 0.000915 | -0.14603  | 0.00126  | -0.28163 | 2.71E-10 |           |
| AIDA     | brown  | 0.288608 | 9.30E-11 | 0.237522  | 1.20E-07 | 0.475379 | 1.03E-28 |           |
| ALAS2    | brown  | 0.033843 | 0.457117 | 0.067548  | 0.137423 | 0.120604 | 0.00784  |           |
| ALDH1A3  | brown  | -0.52965 | 2.00E-36 | -0.09526  | 0.035971 | -0.50209 | 2.45E-32 |           |
| ALDOA    | brown  | 0.355834 | 6.36E-16 | 0.101379  | 0.025573 | 0.321836 | 3.77E-13 |           |
| ALG10    | brown  | 0.559655 | 2.53E-41 | 0.342432  | 8.66E-15 | 0.702123 | 3.00E-73 |           |
| ALMS1-IT | brown  | 0.400714 | 3.93E-20 | 0.113027  | 0.012749 | 0.472717 | 2.27E-28 |           |
| ALPK3    | brown  | -0.16392 | 0.000289 | -0.07405  | 0.103374 | -0.1783  | 7.88E-05 |           |
| AMMECR1  | brown  | 0.320099 | 5.12E-13 | 0.253111  | 1.58E-08 | 0.36049  | 2.49E-16 |           |
| AMT      | brown  | -0.27592 | 6.36E-10 | -0.24233  | 6.53E-08 | -0.4081  | 6.88E-21 |           |
| ANKRD36  | brown  | 0.257972 | 8.19E-09 | 0.096367  | 0.033861 | 0.387491 | 8.00E-19 |           |
| ANKRD36  | brown  | 0.325081 | 2.12E-13 | 0.091103  | 0.044929 | 0.414561 | 1.45E-21 |           |
| ANKRD36  | brown  | 0.23961  | 9.23E-08 | 0.112466  | 0.013202 | 0.341403 | 1.05E-14 |           |
| ANKRD62  | brown  | 0.321762 | 3.82E-13 | 0.189367  | 2.70E-05 | 0.340036 | 1.36E-14 |           |
| ANLN     | brown  | 0.613088 | 2.13E-51 | 0.344266  | 6.10E-15 | 0.832677 | #####    |           |
| ANP32E   | brown  | 0.324438 | 2.38E-13 | 0.198849  | 1.02E-05 | 0.427015 | 6.48E-23 |           |
| AP1S3    | brown  | 0.28188  | 2.61E-10 | 0.226655  | 4.55E-07 | 0.316977 | 8.82E-13 |           |
| APH1B    | brown  | -0.22652 | 4.62E-07 | -0.10311  | 0.023147 | -0.30382 | 8.14E-12 |           |
| APLF     | brown  | 0.268586 | 1.85E-09 | 0.114924  | 0.011316 | 0.405966 | 1.14E-20 |           |
| APOBEC3I | brown  | 0.33028  | 8.31E-14 | 0.141562  | 0.001776 | 0.378333 | 5.96E-18 |           |
| AQP11    | brown  | 0.423687 | 1.50E-22 | 0.128713  | 0.004524 | 0.358739 | 3.55E-16 |           |
| AQP3     | brown  | -0.21739 | 1.34E-06 | -0.02483  | 0.585479 | -0.38172 | 2.86E-18 |           |
| ARHGAP1  | brown  | 0.698239 | 3.96E-72 | 0.338584  | 1.79E-14 | 0.87739  | #####    |           |
| ARHGAP1  | brown  | 0.433401 | 1.25E-23 | 0.052915  | 0.24477  | 0.528101 | 3.48E-36 |           |
| ARHGAP2  | brown  | 0.164064 | 0.000285 | 0.136125  | 0.002664 | 0.40231  | 2.71E-20 |           |
| ARHGDIG  | brown  | 0.28316  | 2.15E-10 | 0.082719  | 0.06874  | 0.22542  | 5.27E-07 |           |
| ARHGEF2  | brown  | 0.229185 | 3.36E-07 | 0.089547  | 0.048731 | 0.280712 | 3.11E-10 |           |
| ARHGEF2  | brown  | -0.0318  | 0.484768 | -0.14788  | 0.00109  | -0.16652 | 0.00023  |           |
| ARHGEF3  | brown  | 0.170351 | 0.000164 | 0.160824  | 0.000377 | 0.213149 | 2.17E-06 |           |
| ARHGEF3  | brown  | 0.572103 | 1.66E-43 | 0.05315   | 0.242681 | 0.520413 | 5.18E-35 |           |
| ARHGEF4  | brown  | -0.48923 | 1.50E-30 | -0.14344  | 0.00154  | -0.38721 | 8.52E-19 |           |
| ARID3C   | brown  | 0.332869 | 5.17E-14 | 0.077234  | 0.089308 | 0.38634  | 1.03E-18 |           |
| ARL5B    | brown  | 0.166801 | 0.000224 | 0.316712  | 9.23E-13 | 0.454274 | 4.54E-26 |           |
| ARL6IP6  | brown  | 0.376066 | 9.70E-18 | 0.253583  | 1.49E-08 | 0.651749 | 5.56E-60 |           |
| ARL9     | brown  | 0.178079 | 8.04E-05 | 0.063067  | 0.165535 | 0.126798 | 0.005165 |           |
| ARMH4    | brown  | 0.03277  | 0.47151  | 0.1581    | 0.000474 | 0.243574 | 5.56E-08 |           |

|           |       |          |          |          |          |          |          |
|-----------|-------|----------|----------|----------|----------|----------|----------|
| ARNTL2    | brown | 0.167937 | 0.000203 | 0.230403 | 2.89E-07 | 0.280842 | 3.05E-10 |
| ARRDC4    | brown | -0.28534 | 1.54E-10 | -0.03439 | 0.449862 | -0.31848 | 6.79E-13 |
| ARSA      | brown | -0.42212 | 2.23E-22 | -0.21281 | 2.26E-06 | -0.56134 | 1.29E-41 |
| ARSD      | brown | -0.32468 | 2.28E-13 | -0.10855 | 0.016783 | -0.44869 | 2.12E-25 |
| ARSF      | brown | -0.2363  | 1.40E-07 | 0.004102 | 0.928212 | -0.31632 | 9.88E-13 |
| ARSG      | brown | -0.15776 | 0.000488 | -0.1113  | 0.014186 | -0.2006  | 8.52E-06 |
| ASB9      | brown | 0.340584 | 1.23E-14 | 0.280202 | 3.36E-10 | 0.335076 | 3.44E-14 |
| ASF1B     | brown | 0.607613 | 2.82E-50 | 0.105355 | 0.020304 | 0.687033 | 5.43E-69 |
| ASNS      | brown | 0.394982 | 1.48E-19 | 0.0702   | 0.122608 | 0.432257 | 1.69E-23 |
| ASPM      | brown | 0.661915 | 1.88E-62 | 0.303676 | 8.34E-12 | 0.862665 | #####    |
| ASTL      | brown | 0.238929 | 1.01E-07 | 0.132205 | 0.003536 | 0.304244 | 7.60E-12 |
| ASTN2     | brown | -0.18217 | 5.45E-05 | -0.17558 | 0.000101 | -0.29595 | 2.92E-11 |
| ATAD2     | brown | 0.617187 | 2.98E-52 | 0.328031 | 1.25E-13 | 0.835285 | #####    |
| ATAD5     | brown | 0.658078 | 1.65E-61 | 0.243905 | 5.33E-08 | 0.816168 | #####    |
| ATOH8     | brown | -0.38172 | 2.86E-18 | -0.19763 | 1.16E-05 | -0.325   | 2.15E-13 |
| ATP5MGL   | brown | 0.216797 | 1.44E-06 | 0.11849  | 0.009003 | 0.170051 | 0.000168 |
| AUNIP     | brown | 0.768532 | 9.92E-96 | 0.298758 | 1.86E-11 | 0.864736 | #####    |
| AURKA     | brown | 0.766345 | 7.15E-95 | 0.303391 | 8.74E-12 | 0.880083 | #####    |
| AURKB     | brown | 0.544619 | 8.31E-39 | 0.084692 | 0.062365 | 0.598012 | 2.31E-48 |
| B3GAT2    | brown | 0.234874 | 1.67E-07 | 0.064111 | 0.158624 | 0.358292 | 3.89E-16 |
| B3GNT9    | brown | -0.41985 | 3.93E-22 | -0.21246 | 2.35E-06 | -0.43773 | 4.04E-24 |
| B4GALT6   | brown | 0.161027 | 0.00037  | 0.092424 | 0.041898 | 0.301959 | 1.11E-11 |
| BARD1     | brown | 0.484402 | 6.68E-30 | 0.218835 | 1.14E-06 | 0.688445 | 2.23E-69 |
| BCAR4     | brown | 0.239681 | 9.15E-08 | 0.085418 | 0.060146 | 0.227835 | 3.95E-07 |
| BCL2L12   | brown | 0.452282 | 7.90E-26 | 0.073343 | 0.106698 | 0.440038 | 2.19E-24 |
| BCL2L2-P  | brown | 0.363086 | 1.47E-16 | 0.146131 | 0.00125  | 0.381447 | 3.03E-18 |
| BCL6      | brown | -0.32834 | 1.18E-13 | -0.15292 | 0.000727 | -0.31549 | 1.14E-12 |
| BEND3     | brown | 0.515863 | 2.48E-34 | 0.142616 | 0.001639 | 0.510596 | 1.47E-33 |
| BIRC5     | brown | 0.71745  | 7.36E-78 | 0.265001 | 3.08E-09 | 0.840289 | #####    |
| BLM       | brown | 0.694904 | 3.52E-71 | 0.249595 | 2.53E-08 | 0.825127 | #####    |
| BOK       | brown | -0.31964 | 5.54E-13 | -0.25274 | 1.67E-08 | -0.4351  | 8.05E-24 |
| BOLA3-A   | brown | 0.40366  | 1.97E-20 | 0.145826 | 0.00128  | 0.512698 | 7.26E-34 |
| BORA      | brown | 0.656086 | 5.04E-61 | 0.193114 | 1.85E-05 | 0.785735 | #####    |
| BRCA1     | brown | 0.552739 | 3.77E-40 | 0.210482 | 2.93E-06 | 0.66382  | 6.32E-63 |
| BRCA2     | brown | 0.643849 | 3.98E-58 | 0.280022 | 3.45E-10 | 0.828358 | #####    |
| BRI3BP    | brown | 0.525713 | 8.12E-36 | 0.269217 | 1.69E-09 | 0.505648 | 7.64E-33 |
| BRIP1     | brown | 0.598286 | 2.04E-48 | 0.331809 | 6.28E-14 | 0.807679 | #####    |
| BTG3-AS1  | brown | 0.217013 | 1.40E-06 | 0.087564 | 0.053965 | 0.302332 | 1.04E-11 |
| BUB1      | brown | 0.709475 | 2.01E-75 | 0.307061 | 4.76E-12 | 0.894128 | #####    |
| BUB1B     | brown | 0.703253 | 1.40E-73 | 0.302432 | 1.02E-11 | 0.884261 | #####    |
| C16orf89  | brown | -0.17999 | 6.71E-05 | -0.10569 | 0.019909 | -0.34818 | 2.87E-15 |
| C18orf54  | brown | 0.472618 | 2.34E-28 | 0.27285  | 9.98E-10 | 0.724281 | 5.16E-80 |
| C19orf57  | brown | 0.449903 | 1.52E-25 | 0.015272 | 0.737269 | 0.47513  | 1.11E-28 |
| C1D       | brown | 0.39445  | 1.67E-19 | 0.357323 | 4.72E-16 | 0.538348 | 8.55E-38 |
| C1orf112  | brown | 0.617889 | 2.12E-52 | 0.180175 | 6.60E-05 | 0.732883 | 8.04E-83 |
| C1orf21   | brown | -0.17141 | 0.000149 | -0.00072 | 0.987457 | -0.22483 | 5.65E-07 |
| C1QTNF6   | brown | -0.48248 | 1.20E-29 | -0.15045 | 0.000888 | -0.43788 | 3.88E-24 |
| C20orf144 | brown | 0.318569 | 6.69E-13 | 0.026437 | 0.561372 | 0.307534 | 4.40E-12 |
| C20orf194 | brown | -0.21424 | 1.92E-06 | -0.06427 | 0.157579 | -0.16944 | 0.000177 |
| C22orf24  | brown | 0.184816 | 4.22E-05 | 0.05712  | 0.209215 | 0.228708 | 3.55E-07 |
| C2CD4B    | brown | -0.16355 | 0.000298 | -0.12917 | 0.004381 | -0.31193 | 2.09E-12 |
| C2CD4C    | brown | -0.309   | 3.44E-12 | -0.17607 | 9.70E-05 | -0.25025 | 2.32E-08 |
| C3orf49   | brown | 0.223791 | 6.39E-07 | 0.129034 | 0.004424 | 0.272461 | 1.06E-09 |
| C4orf51   | brown | 0.138578 | 0.002222 | 0.089674 | 0.04841  | 0.153136 | 0.000715 |
| C5orf30   | brown | 0.434846 | 8.60E-24 | 0.243377 | 5.70E-08 | 0.539326 | 5.97E-38 |
| C5orf34   | brown | 0.688725 | 1.86E-69 | 0.24753  | 3.33E-08 | 0.8302   | #####    |
| C6orf99   | brown | 0.408885 | 5.70E-21 | 0.172976 | 0.000129 | 0.368733 | 4.57E-17 |
| C7orf25   | brown | 0.352629 | 1.20E-15 | 0.222926 | 7.07E-07 | 0.417491 | 7.04E-22 |

|          |       |          |          |          |          |          |          |
|----------|-------|----------|----------|----------|----------|----------|----------|
| C8orf74  | brown | -0.17438 | 0.000113 | -0.07836 | 0.084745 | -0.22498 | 5.55E-07 |
| C8orf76  | brown | 0.531321 | 1.10E-36 | 0.319886 | 5.31E-13 | 0.577912 | 1.47E-44 |
| C9orf153 | brown | 0.188577 | 2.92E-05 | 0.073377 | 0.106534 | 0.271696 | 1.18E-09 |
| C9orf40  | brown | 0.542609 | 1.76E-38 | 0.143639 | 0.001516 | 0.615138 | 8.00E-52 |
| CABP1    | brown | -0.29036 | 7.08E-11 | -0.06098 | 0.179975 | -0.31778 | 7.67E-13 |
| CABP4    | brown | -0.11096 | 0.014492 | -0.17351 | 0.000123 | -0.26177 | 4.84E-09 |
| CACNB3   | brown | -0.33996 | 1.38E-14 | -0.21396 | 1.98E-06 | -0.34469 | 5.62E-15 |
| CACYBP   | brown | 0.394043 | 1.83E-19 | 0.246425 | 3.84E-08 | 0.44948  | 1.71E-25 |
| CADM2    | brown | 0.033467 | 0.462138 | -0.05137 | 0.258857 | 0.147519 | 0.001121 |
| CALB1    | brown | 0.143978 | 0.001477 | 0.113417 | 0.012442 | 0.277077 | 5.36E-10 |
| CAMK2N1  | brown | -0.35161 | 1.47E-15 | -0.03053 | 0.502412 | -0.34894 | 2.48E-15 |
| CAPN2    | brown | -0.25715 | 9.17E-09 | 0.016688 | 0.713921 | -0.29045 | 6.98E-11 |
| CASC11   | brown | 0.247385 | 3.39E-08 | 0.111435 | 0.014072 | 0.215292 | 1.71E-06 |
| CASC8    | brown | -0.14027 | 0.001958 | -0.15708 | 0.000516 | -0.27623 | 6.08E-10 |
| CASTOR3  | brown | -0.25854 | 7.57E-09 | -0.26656 | 2.47E-09 | -0.26352 | 3.80E-09 |
| CASZ1    | brown | -0.16201 | 0.00034  | -0.17796 | 8.13E-05 | -0.30514 | 6.55E-12 |
| CAVIN4   | brown | 0.333047 | 5.01E-14 | 0.097921 | 0.031075 | 0.563989 | 4.49E-42 |
| CBS      | brown | 0.395563 | 1.29E-19 | 0.132785 | 0.003393 | 0.465099 | 2.11E-27 |
| CBSL     | brown | 0.270101 | 1.49E-09 | 0.065687 | 0.148616 | 0.331133 | 7.11E-14 |
| CBWD1    | brown | 0.488747 | 1.74E-30 | 0.209443 | 3.28E-06 | 0.496803 | 1.36E-31 |
| CBWD2    | brown | 0.532447 | 7.34E-37 | 0.264845 | 3.15E-09 | 0.639186 | 4.67E-57 |
| CBWD3    | brown | 0.313232 | 1.68E-12 | 0.016116 | 0.723314 | 0.38819  | 6.84E-19 |
| CBWD5    | brown | 0.495281 | 2.21E-31 | 0.112039 | 0.013557 | 0.501348 | 3.13E-32 |
| CBX2     | brown | 0.211329 | 2.66E-06 | 0.009534 | 0.834122 | 0.287185 | 1.16E-10 |
| CBX3P2   | brown | 0.251653 | 1.93E-08 | 0.110869 | 0.014571 | 0.414302 | 1.54E-21 |
| CCBE1    | brown | -0.41269 | 2.28E-21 | -0.14601 | 0.001261 | -0.38465 | 1.50E-18 |
| CCDC15   | brown | 0.320141 | 5.08E-13 | 0.138815 | 0.002184 | 0.412039 | 2.67E-21 |
| CCDC150  | brown | 0.56038  | 1.89E-41 | 0.135006 | 0.00289  | 0.753194 | 6.62E-90 |
| CCDC163  | brown | 0.286357 | 1.32E-10 | -0.10465 | 0.021167 | 0.245504 | 4.33E-08 |
| CCDC177  | brown | 0.275114 | 7.16E-10 | 0.04952  | 0.276408 | 0.283754 | 1.96E-10 |
| CCDC18   | brown | 0.583102 | 1.63E-45 | 0.271869 | 1.15E-09 | 0.721969 | 2.81E-79 |
| CCDC62   | brown | 0.222978 | 7.03E-07 | 0.093109 | 0.040395 | 0.297925 | 2.13E-11 |
| CCDC85C  | brown | 0.376302 | 9.22E-18 | 0.100279 | 0.027224 | 0.404337 | 1.68E-20 |
| CCDC9B   | brown | -0.20454 | 5.60E-06 | -0.06654 | 0.143375 | -0.21146 | 2.62E-06 |
| CCN6     | brown | 0.221243 | 8.61E-07 | 0.135269 | 0.002835 | 0.261018 | 5.38E-09 |
| CCNA2    | brown | 0.7296   | 9.76E-82 | 0.306509 | 5.22E-12 | 0.900696 | #####    |
| CCNB1    | brown | 0.706378 | 1.69E-74 | 0.233629 | 1.95E-07 | 0.823807 | #####    |
| CCNB2    | brown | 0.711041 | 6.78E-76 | 0.216149 | 1.55E-06 | 0.79182  | #####    |
| CCNE1    | brown | 0.502066 | 2.48E-32 | 0.119068 | 0.008671 | 0.588944 | 1.30E-46 |
| CCNE2    | brown | 0.509145 | 2.39E-33 | 0.253962 | 1.41E-08 | 0.618772 | 1.38E-52 |
| CCNF     | brown | 0.647795 | 4.79E-59 | 0.174973 | 0.000107 | 0.71566  | 2.64E-77 |
| CCNI2    | brown | 0.313512 | 1.60E-12 | 0.152944 | 0.000726 | 0.278284 | 4.48E-10 |
| CCNYL1   | brown | 0.392898 | 2.37E-19 | 0.304709 | 7.04E-12 | 0.537997 | 9.73E-38 |
| CCPG1    | brown | -0.16367 | 0.000295 | 0.138795 | 0.002187 | -0.14748 | 0.001124 |
| CCSAP    | brown | 0.469739 | 5.46E-28 | 0.20924  | 3.36E-06 | 0.61731  | 2.81E-52 |
| CCZ1     | brown | 0.435598 | 7.06E-24 | 0.252247 | 1.78E-08 | 0.494909 | 2.49E-31 |
| CCZ1B    | brown | 0.388489 | 6.40E-19 | 0.171958 | 0.000141 | 0.450339 | 1.35E-25 |
| CD3EAP   | brown | 0.49282  | 4.83E-31 | 0.057892 | 0.203116 | 0.434124 | 1.04E-23 |
| CD59     | brown | -0.44532 | 5.32E-25 | -0.0908  | 0.045648 | -0.45984 | 9.50E-27 |
| CD99     | brown | -0.3532  | 1.07E-15 | 0.01993  | 0.66152  | -0.34621 | 4.20E-15 |
| CDC20    | brown | 0.65604  | 5.18E-61 | 0.14588  | 0.001275 | 0.696112 | 1.60E-71 |
| CDC25A   | brown | 0.697018 | 8.85E-72 | 0.256186 | 1.05E-08 | 0.822338 | #####    |
| CDC25C   | brown | 0.716785 | 1.18E-77 | 0.225492 | 5.22E-07 | 0.819064 | #####    |
| CDC45    | brown | 0.648705 | 2.93E-59 | 0.126285 | 0.005351 | 0.73377  | 4.07E-83 |
| CDC6     | brown | 0.669084 | 2.97E-64 | 0.282759 | 2.28E-10 | 0.735844 | 8.19E-84 |
| CDC7     | brown | 0.691066 | 4.19E-70 | 0.339193 | 1.60E-14 | 0.866872 | #####    |
| CDCA2    | brown | 0.714878 | 4.59E-77 | 0.302387 | 1.03E-11 | 0.836307 | #####    |
| CDCA3    | brown | 0.636447 | 1.95E-56 | 0.125587 | 0.005612 | 0.691745 | 2.71E-70 |

|          |       |          |          |          |          |          |          |
|----------|-------|----------|----------|----------|----------|----------|----------|
| CDCA4    | brown | 0.475786 | 9.12E-29 | 0.060513 | 0.183373 | 0.587071 | 2.93E-46 |
| CDCA5    | brown | 0.747679 | 6.48E-88 | 0.258865 | 7.25E-09 | 0.866219 | #####    |
| CDCA7    | brown | 0.263308 | 3.91E-09 | 0.112666 | 0.013038 | 0.288906 | 8.88E-11 |
| CDCA7L   | brown | 0.334895 | 3.56E-14 | 0.064224 | 0.157892 | 0.425881 | 8.64E-23 |
| CDCA8    | brown | 0.712283 | 2.85E-76 | 0.170213 | 0.000166 | 0.812371 | #####    |
| CDH18    | brown | 0.22549  | 5.23E-07 | 0.063179 | 0.16478  | 0.360052 | 2.72E-16 |
| CDH4     | brown | -0.15588 | 0.000571 | -0.10635 | 0.019148 | -0.18433 | 4.43E-05 |
| CDIPTOSP | brown | 0.303776 | 8.21E-12 | 0.020001 | 0.660384 | 0.25709  | 9.24E-09 |
| CDK1     | brown | 0.61543  | 6.95E-52 | 0.367727 | 5.64E-17 | 0.792749 | #####    |
| CDKN1B   | brown | 0.268917 | 1.76E-09 | 0.135492 | 0.00279  | 0.430609 | 2.58E-23 |
| CDKN2C   | brown | 0.292886 | 4.76E-11 | 0.027708 | 0.542687 | 0.340642 | 1.22E-14 |
| CDKN3    | brown | 0.717664 | 6.32E-78 | 0.286353 | 1.32E-10 | 0.818039 | #####    |
| CDT1     | brown | 0.51782  | 1.27E-34 | 0.056046 | 0.217927 | 0.467749 | 9.77E-28 |
| CDYL2    | brown | -0.25163 | 1.93E-08 | 0.018694 | 0.681324 | -0.26554 | 2.85E-09 |
| CEBPB-AS | brown | 0.362212 | 1.76E-16 | -0.04062 | 0.372045 | 0.361912 | 1.87E-16 |
| CEBPZ    | brown | 0.510519 | 1.51E-33 | 0.299615 | 1.62E-11 | 0.659787 | 6.30E-62 |
| CENPA    | brown | 0.728732 | 1.88E-81 | 0.25809  | 8.06E-09 | 0.873992 | #####    |
| CENPE    | brown | 0.680356 | 3.45E-67 | 0.307508 | 4.42E-12 | 0.882441 | #####    |
| CENPF    | brown | 0.606746 | 4.22E-50 | 0.240747 | 7.99E-08 | 0.815949 | #####    |
| CENPH    | brown | 0.520849 | 4.45E-35 | 0.101027 | 0.026092 | 0.626229 | 3.52E-54 |
| CENPI    | brown | 0.716352 | 1.61E-77 | 0.270438 | 1.42E-09 | 0.86063  | #####    |
| CENPK    | brown | 0.51929  | 7.64E-35 | 0.283618 | 2.00E-10 | 0.675136 | 8.19E-66 |
| CENPL    | brown | 0.688358 | 2.35E-69 | 0.228917 | 3.47E-07 | 0.78018  | #####    |
| CENPN    | brown | 0.676521 | 3.56E-66 | 0.296449 | 2.70E-11 | 0.763023 | 1.38E-93 |
| CENPO    | brown | 0.611868 | 3.80E-51 | 0.102121 | 0.024509 | 0.710451 | 1.02E-75 |
| CENPQ    | brown | 0.574812 | 5.39E-44 | 0.341138 | 1.11E-14 | 0.751083 | 3.88E-89 |
| CENPU    | brown | 0.56769  | 1.01E-42 | 0.264929 | 3.11E-09 | 0.705106 | 4.01E-74 |
| CENPW    | brown | 0.4827   | 1.13E-29 | 0.143928 | 0.001483 | 0.559603 | 2.58E-41 |
| CEP128   | brown | 0.457045 | 2.09E-26 | 0.245372 | 4.41E-08 | 0.595803 | 6.23E-48 |
| CEP295   | brown | 0.45159  | 9.57E-26 | 0.215765 | 1.62E-06 | 0.635802 | 2.72E-56 |
| CEP55    | brown | 0.647433 | 5.83E-59 | 0.282445 | 2.40E-10 | 0.807821 | #####    |
| CEP72    | brown | 0.574083 | 7.30E-44 | 0.102292 | 0.024268 | 0.627465 | 1.90E-54 |
| CEP85    | brown | 0.585278 | 6.38E-46 | 0.182461 | 5.30E-05 | 0.636873 | 1.56E-56 |
| CFH      | brown | -0.42967 | 3.28E-23 | -0.05793 | 0.202807 | -0.4215  | 2.60E-22 |
| CFL2     | brown | 0.202026 | 7.33E-06 | 0.163143 | 0.000309 | 0.348748 | 2.57E-15 |
| CGAS     | brown | 0.269224 | 1.69E-09 | 0.178455 | 7.76E-05 | 0.318545 | 6.71E-13 |
| CGNL1    | brown | -0.41236 | 2.47E-21 | -0.13584 | 0.002721 | -0.43444 | 9.57E-24 |
| CH25H    | brown | -0.39159 | 3.19E-19 | -0.14783 | 0.001094 | -0.3737  | 1.60E-17 |
| CHAC2    | brown | 0.681728 | 1.48E-67 | 0.435363 | 7.51E-24 | 0.744314 | 1.00E-86 |
| CHAF1A   | brown | 0.518197 | 1.11E-34 | 0.066752 | 0.142128 | 0.506137 | 6.50E-33 |
| CHAF1B   | brown | 0.625078 | 6.24E-54 | 0.193202 | 1.83E-05 | 0.643242 | 5.50E-58 |
| CHCHD7   | brown | 0.425185 | 1.03E-22 | 0.221757 | 8.11E-07 | 0.489121 | 1.54E-30 |
| CHEK1    | brown | 0.677397 | 2.09E-66 | 0.326056 | 1.78E-13 | 0.840541 | #####    |
| CHEK2    | brown | 0.606522 | 4.68E-50 | 0.193973 | 1.69E-05 | 0.684718 | 2.32E-68 |
| CHN2     | brown | -0.32074 | 4.58E-13 | -0.12041 | 0.007943 | -0.35343 | 1.03E-15 |
| CHPF     | brown | -0.45717 | 2.02E-26 | -0.12784 | 0.004808 | -0.46855 | 7.74E-28 |
| CHRNA5   | brown | 0.351746 | 1.43E-15 | 0.186179 | 3.70E-05 | 0.394817 | 1.53E-19 |
| CHST1    | brown | -0.28056 | 3.19E-10 | -0.16776 | 0.000206 | -0.30154 | 1.19E-11 |
| CIP2A    | brown | 0.715695 | 2.57E-77 | 0.32821  | 1.21E-13 | 0.925709 | #####    |
| CIRBP    | brown | -0.42222 | 2.17E-22 | -0.24591 | 4.11E-08 | -0.45542 | 3.30E-26 |
| CIT      | brown | 0.469989 | 5.08E-28 | 0.057339 | 0.207477 | 0.56991  | 4.08E-43 |
| CKAP2    | brown | 0.58519  | 6.62E-46 | 0.301819 | 1.13E-11 | 0.818221 | #####    |
| CKAP2L   | brown | 0.709382 | 2.14E-75 | 0.269088 | 1.72E-09 | 0.903627 | #####    |
| CKS1B    | brown | 0.643466 | 4.88E-58 | 0.17648  | 9.34E-05 | 0.749223 | 1.82E-88 |
| CKS2     | brown | 0.601946 | 3.86E-49 | 0.156697 | 0.000533 | 0.658636 | 1.21E-61 |
| CLEC2L   | brown | 0.119515 | 0.008421 | 0.037347 | 0.411848 | 0.23026  | 2.95E-07 |
| CLIC5    | brown | -0.27231 | 1.08E-09 | -0.02225 | 0.624927 | -0.31198 | 2.08E-12 |
| CLSPN    | brown | 0.635966 | 2.50E-56 | 0.246699 | 3.71E-08 | 0.760743 | 1.02E-92 |

|          |       |          |          |          |          |          |          |
|----------|-------|----------|----------|----------|----------|----------|----------|
| CLU      | brown | -0.26335 | 3.88E-09 | -0.12331 | 0.006547 | -0.2958  | 2.99E-11 |
| CNBD2    | brown | 0.311787 | 2.15E-12 | 0.117203 | 0.009784 | 0.301795 | 1.14E-11 |
| CNNM3-L  | brown | 0.278161 | 4.56E-10 | 0.024564 | 0.589443 | 0.268663 | 1.83E-09 |
| CNTLN    | brown | 0.170864 | 0.000156 | 0.091047 | 0.045061 | 0.253684 | 1.47E-08 |
| COCH     | brown | 0.076608 | 0.091944 | 0.115652 | 0.010804 | 0.111777 | 0.013777 |
| COLEC11  | brown | -0.12927 | 0.004352 | -0.12432 | 0.006118 | -0.26363 | 3.73E-09 |
| COQ3     | brown | 0.639248 | 4.52E-57 | 0.246785 | 3.67E-08 | 0.586937 | 3.11E-46 |
| CORO2B   | brown | -0.3887  | 6.10E-19 | -0.09995 | 0.027738 | -0.29704 | 2.46E-11 |
| CPA6     | brown | 0.074859 | 0.099628 | 0.092332 | 0.042102 | 0.150662 | 0.000873 |
| CPQ      | brown | -0.36792 | 5.42E-17 | -0.11519 | 0.011124 | -0.35715 | 4.89E-16 |
| CPS1     | brown | 0.219988 | 9.97E-07 | 0.099207 | 0.028921 | 0.369167 | 4.17E-17 |
| CRABP1   | brown | 0.240427 | 8.32E-08 | 0.090955 | 0.045278 | 0.297875 | 2.15E-11 |
| CRAT     | brown | -0.37288 | 1.91E-17 | -0.16763 | 0.000209 | -0.46499 | 2.18E-27 |
| CRYM     | brown | -0.09607 | 0.034415 | 0.102543 | 0.023921 | -0.15229 | 0.000766 |
| CSPG5    | brown | 0.515069 | 3.25E-34 | 0.125309 | 0.00572  | 0.607363 | 3.16E-50 |
| CST3     | brown | -0.4176  | 6.85E-22 | -0.2597  | 6.46E-09 | -0.61855 | 1.54E-52 |
| CSTF3-DT | brown | 0.313428 | 1.62E-12 | 0.088348 | 0.051841 | 0.374867 | 1.25E-17 |
| CTF1     | brown | -0.24196 | 6.84E-08 | -0.22181 | 8.06E-07 | -0.23621 | 1.41E-07 |
| CUBN     | brown | -0.50614 | 6.49E-33 | -0.24449 | 4.94E-08 | -0.54275 | 1.67E-38 |
| CWF19L2  | brown | 0.372237 | 2.19E-17 | 0.2761   | 6.19E-10 | 0.528817 | 2.70E-36 |
| CX3CL1   | brown | -0.3679  | 5.44E-17 | -0.08074 | 0.075648 | -0.32232 | 3.46E-13 |
| CYB5R1   | brown | -0.36898 | 4.34E-17 | -0.14411 | 0.001462 | -0.51954 | 7.00E-35 |
| CYP1B1-A | brown | -0.16367 | 0.000295 | -0.0409  | 0.368766 | -0.19103 | 2.28E-05 |
| CYP27A1  | brown | -0.3197  | 5.49E-13 | -0.20367 | 6.15E-06 | -0.42706 | 6.40E-23 |
| DAB2     | brown | -0.46043 | 8.04E-27 | -0.03785 | 0.405604 | -0.45587 | 2.91E-26 |
| DARS2    | brown | 0.586641 | 3.54E-46 | 0.332301 | 5.74E-14 | 0.571916 | 1.79E-43 |
| DBF4     | brown | 0.653274 | 2.40E-60 | 0.304496 | 7.29E-12 | 0.784969 | #####    |
| DCK      | brown | 0.438876 | 2.98E-24 | 0.338084 | 1.97E-14 | 0.636555 | 1.84E-56 |
| DCXR-DT  | brown | 0.339383 | 1.54E-14 | 0.135227 | 0.002844 | 0.31027  | 2.78E-12 |
| DDIAS    | brown | 0.636917 | 1.53E-56 | 0.301762 | 1.14E-11 | 0.764418 | 4.00E-94 |
| DDIT3    | brown | 0.251273 | 2.03E-08 | -0.04238 | 0.351733 | 0.271481 | 1.22E-09 |
| DDN      | brown | 0.439416 | 2.58E-24 | 0.113422 | 0.012438 | 0.37973  | 4.40E-18 |
| DDN-AS1  | brown | 0.378848 | 5.33E-18 | 0.077178 | 0.089541 | 0.363045 | 1.48E-16 |
| DDX11    | brown | 0.288292 | 9.77E-11 | -0.05683 | 0.211518 | 0.315656 | 1.11E-12 |
| DDX11-A  | brown | 0.427833 | 5.26E-23 | 0.017835 | 0.695217 | 0.429393 | 3.53E-23 |
| DDX21    | brown | 0.414509 | 1.46E-21 | 0.281872 | 2.61E-10 | 0.540606 | 3.72E-38 |
| DDX47    | brown | 0.278822 | 4.13E-10 | 0.061974 | 0.172998 | 0.430474 | 2.67E-23 |
| DEK      | brown | 0.491871 | 6.51E-31 | 0.365088 | 9.73E-17 | 0.706485 | 1.57E-74 |
| DENND2B  | brown | -0.42668 | 7.05E-23 | -0.09002 | 0.047548 | -0.35856 | 3.68E-16 |
| DENND5B  | brown | 0.24139  | 7.36E-08 | 0.071742 | 0.114587 | 0.351548 | 1.49E-15 |
| DEPDC1   | brown | 0.746357 | 1.91E-87 | 0.335488 | 3.19E-14 | 0.926341 | #####    |
| DEPDC1-L | brown | 0.464003 | 2.89E-27 | 0.313635 | 1.57E-12 | 0.569637 | 4.56E-43 |
| DEPDC1B  | brown | 0.697403 | 6.87E-72 | 0.31626  | 9.98E-13 | 0.876435 | #####    |
| DEPDC4   | brown | 0.560901 | 1.54E-41 | 0.183687 | 4.71E-05 | 0.594029 | 1.38E-47 |
| DGCR11   | brown | 0.259988 | 6.21E-09 | 0.067219 | 0.139354 | 0.258107 | 8.04E-09 |
| DGKA     | brown | -0.32835 | 1.18E-13 | -0.16749 | 0.000211 | -0.41364 | 1.81E-21 |
| DHCR24   | brown | 0.427175 | 6.22E-23 | 0.253215 | 1.56E-08 | 0.445273 | 5.38E-25 |
| DHCR7    | brown | 0.27259  | 1.04E-09 | 0.130207 | 0.004074 | 0.248269 | 3.02E-08 |
| DHDH     | brown | 0.431913 | 1.84E-23 | 0.052638 | 0.247258 | 0.37057  | 3.11E-17 |
| DHFR     | brown | 0.514109 | 4.50E-34 | 0.201315 | 7.90E-06 | 0.64129  | 1.55E-57 |
| DHRS2    | brown | 0.372627 | 2.02E-17 | 0.069364 | 0.127142 | 0.395649 | 1.27E-19 |
| DIAPH3   | brown | 0.626919 | 2.49E-54 | 0.297879 | 2.15E-11 | 0.822777 | #####    |
| DLEU2    | brown | 0.523421 | 1.82E-35 | 0.203621 | 6.18E-06 | 0.673671 | 1.97E-65 |
| DLGAP2   | brown | -0.23403 | 1.86E-07 | -0.0879  | 0.053048 | -0.22936 | 3.28E-07 |
| DLGAP5   | brown | 0.73064  | 4.44E-82 | 0.331054 | 7.21E-14 | 0.912887 | #####    |
| DMBT1    | brown | -0.38128 | 3.14E-18 | -0.06942 | 0.126829 | -0.49419 | 3.13E-31 |
| DMBX1    | brown | 0.261908 | 4.75E-09 | 0.050539 | 0.26664  | 0.328195 | 1.21E-13 |
| DMC1     | brown | 0.329807 | 9.05E-14 | 0.0498   | 0.273701 | 0.372659 | 2.00E-17 |

|          |       |          |          |          |          |          |          |
|----------|-------|----------|----------|----------|----------|----------|----------|
| DMRT1    | brown | 0.375644 | 1.06E-17 | 0.139502 | 0.002074 | 0.392714 | 2.47E-19 |
| DMRT2    | brown | 0.250184 | 2.34E-08 | 0.082108 | 0.070822 | 0.271281 | 1.25E-09 |
| DMRT3    | brown | 0.286644 | 1.26E-10 | 0.101818 | 0.024939 | 0.315171 | 1.20E-12 |
| DMTN     | brown | -0.22049 | 9.40E-07 | -0.09349 | 0.039584 | -0.2844  | 1.78E-10 |
| DNA2     | brown | 0.629707 | 6.13E-55 | 0.275862 | 6.42E-10 | 0.805451 | #####    |
| DNAJB7   | brown | 0.156118 | 0.00056  | 0.099312 | 0.028751 | 0.258219 | 7.92E-09 |
| DNAJC28  | brown | 0.326444 | 1.66E-13 | 0.139465 | 0.00208  | 0.363969 | 1.23E-16 |
| DNAJC9   | brown | 0.494646 | 2.70E-31 | 0.088372 | 0.051777 | 0.594578 | 1.08E-47 |
| DNMT1    | brown | 0.32547  | 1.98E-13 | 0.051386 | 0.258694 | 0.382114 | 2.62E-18 |
| DNMT3B   | brown | 0.509405 | 2.19E-33 | 0.138522 | 0.002232 | 0.615486 | 6.77E-52 |
| DPEP1    | brown | -0.42601 | 8.36E-23 | -0.14945 | 0.000962 | -0.54989 | 1.13E-39 |
| DPF1     | brown | 0.302014 | 1.10E-11 | 0.10787  | 0.017482 | 0.309395 | 3.22E-12 |
| DRP2     | brown | 0.176732 | 9.12E-05 | -0.02566 | 0.572949 | 0.363497 | 1.35E-16 |
| DSCC1    | brown | 0.720073 | 1.12E-78 | 0.308194 | 3.94E-12 | 0.83886  | #####    |
| DSCR8    | brown | 0.234202 | 1.82E-07 | 0.150428 | 0.00089  | 0.268444 | 1.89E-09 |
| DSCR9    | brown | 0.378668 | 5.54E-18 | 0.022562 | 0.620135 | 0.37282  | 1.94E-17 |
| DSN1     | brown | 0.675466 | 6.72E-66 | 0.213025 | 2.20E-06 | 0.786459 | #####    |
| DTL      | brown | 0.66628  | 1.53E-63 | 0.289899 | 7.61E-11 | 0.81245  | #####    |
| DTX2     | brown | -0.26463 | 3.24E-09 | -0.17802 | 8.08E-05 | -0.44186 | 1.34E-24 |
| DTX3     | brown | -0.33302 | 5.03E-14 | -0.25548 | 1.15E-08 | -0.3746  | 1.33E-17 |
| DTX4     | brown | -0.16626 | 0.000235 | 0.023098 | 0.611852 | -0.20334 | 6.37E-06 |
| DUOX1    | brown | -0.31161 | 2.21E-12 | -0.13293 | 0.003357 | -0.48393 | 7.73E-30 |
| DUOX2    | brown | -0.22993 | 3.07E-07 | 0.009102 | 0.841533 | -0.29408 | 3.94E-11 |
| DUOXA1   | brown | -0.25249 | 1.72E-08 | -0.03701 | 0.416044 | -0.34789 | 3.03E-15 |
| DUOXA2   | brown | -0.1583  | 0.000466 | 0.032085 | 0.480831 | -0.22957 | 3.20E-07 |
| DUSP23   | brown | -0.32721 | 1.45E-13 | -0.19651 | 1.31E-05 | -0.47791 | 4.82E-29 |
| DUXAP10  | brown | 0.291369 | 6.04E-11 | 0.041386 | 0.363098 | 0.311107 | 2.41E-12 |
| DUXAP8   | brown | 0.284972 | 1.63E-10 | 0.069362 | 0.12715  | 0.340089 | 1.35E-14 |
| DUXAP9   | brown | 0.302057 | 1.09E-11 | 0.099581 | 0.028319 | 0.374851 | 1.26E-17 |
| E2F1     | brown | 0.630886 | 3.37E-55 | 0.12072  | 0.00778  | 0.721788 | 3.21E-79 |
| E2F2     | brown | 0.678785 | 9.01E-67 | 0.194138 | 1.67E-05 | 0.746973 | 1.16E-87 |
| E2F5     | brown | 0.363417 | 1.37E-16 | 0.244576 | 4.89E-08 | 0.523457 | 1.79E-35 |
| E2F7     | brown | 0.277593 | 4.96E-10 | 0.176697 | 9.15E-05 | 0.373592 | 1.64E-17 |
| E2F8     | brown | 0.614788 | 9.46E-52 | 0.253687 | 1.47E-08 | 0.745052 | 5.52E-87 |
| EBP      | brown | 0.334578 | 3.78E-14 | 0.018592 | 0.682965 | 0.297379 | 2.33E-11 |
| ECE2     | brown | 0.493261 | 4.20E-31 | 0.128609 | 0.004557 | 0.346741 | 3.79E-15 |
| ECEL1    | brown | -0.28227 | 2.46E-10 | -0.08885 | 0.050532 | -0.33472 | 3.67E-14 |
| ECT2     | brown | 0.600969 | 6.04E-49 | 0.339435 | 1.53E-14 | 0.801536 | #####    |
| EDN3     | brown | -0.46577 | 1.73E-27 | -0.08541 | 0.060162 | -0.5184  | 1.04E-34 |
| EFCAB13  | brown | 0.154013 | 0.000666 | 0.042902 | 0.345781 | 0.273748 | 8.75E-10 |
| EFCC1    | brown | -0.28916 | 8.53E-11 | -0.15943 | 0.000424 | -0.41663 | 8.70E-22 |
| EFNA1    | brown | -0.15601 | 0.000565 | -0.13596 | 0.002696 | -0.26274 | 4.23E-09 |
| EID3     | brown | 0.205178 | 5.23E-06 | 0.003225 | 0.94353  | 0.247663 | 3.27E-08 |
| ELANE    | brown | -0.28533 | 1.54E-10 | -0.16782 | 0.000205 | -0.27839 | 4.41E-10 |
| ELFN1-AS | brown | 0.445571 | 4.96E-25 | 0.10283  | 0.023527 | 0.365124 | 9.66E-17 |
| ELOVL6   | brown | 0.396063 | 1.15E-19 | 0.212779 | 2.27E-06 | 0.469796 | 5.37E-28 |
| ELOVL7   | brown | 0.442621 | 1.10E-24 | 0.284023 | 1.88E-10 | 0.553639 | 2.66E-40 |
| EMBP1    | brown | 0.274571 | 7.76E-10 | 0.07633  | 0.093132 | 0.318726 | 6.51E-13 |
| EME1     | brown | 0.706002 | 2.18E-74 | 0.163381 | 0.000303 | 0.811116 | #####    |
| ENO1     | brown | 0.510242 | 1.66E-33 | 0.249176 | 2.68E-08 | 0.566914 | 1.38E-42 |
| ENTPD8   | brown | -0.18738 | 3.29E-05 | -0.1605  | 0.000387 | -0.34289 | 7.94E-15 |
| EPHA6    | brown | 0.264368 | 3.37E-09 | 0.07239  | 0.111341 | 0.405028 | 1.43E-20 |
| EPS8L3   | brown | -0.22706 | 4.33E-07 | 0.042307 | 0.352512 | -0.37672 | 8.43E-18 |
| EQTN     | brown | 0.154548 | 0.000637 | 0.037683 | 0.407649 | 0.218624 | 1.17E-06 |
| ERCC6L   | brown | 0.760372 | 1.41E-92 | 0.329633 | 9.34E-14 | 0.896852 | #####    |
| ESCO2    | brown | 0.629264 | 7.67E-55 | 0.346403 | 4.05E-15 | 0.772503 | 2.60E-97 |
| ESPL1    | brown | 0.664781 | 3.63E-63 | 0.147973 | 0.001082 | 0.757641 | 1.50E-91 |
| ESRRB    | brown | 0.268743 | 1.81E-09 | 0.115112 | 0.011181 | 0.305274 | 6.41E-12 |

|          |       |          |          |          |          |          |          |
|----------|-------|----------|----------|----------|----------|----------|----------|
| EVA1C    | brown | -0.37956 | 4.57E-18 | -0.25015 | 2.35E-08 | -0.48281 | 1.09E-29 |
| EXD1     | brown | 0.230398 | 2.90E-07 | 0.079425 | 0.080569 | 0.272875 | 9.95E-10 |
| EXO1     | brown | 0.73708  | 3.13E-84 | 0.277191 | 5.27E-10 | 0.855049 | #####    |
| EYS      | brown | 0.224974 | 5.56E-07 | 0.16936  | 0.000179 | 0.269397 | 1.65E-09 |
| EZH2     | brown | 0.567474 | 1.10E-42 | 0.107403 | 0.017979 | 0.688988 | 1.58E-69 |
| F10      | brown | -0.3317  | 6.41E-14 | -0.19502 | 1.52E-05 | -0.3558  | 6.40E-16 |
| FAAP24   | brown | 0.624721 | 7.45E-54 | 0.118594 | 0.008942 | 0.686517 | 7.52E-69 |
| FADS1    | brown | 0.278712 | 4.20E-10 | 0.189504 | 2.66E-05 | 0.383938 | 1.76E-18 |
| FAM102A  | brown | -0.31669 | 9.26E-13 | -0.07035 | 0.121812 | -0.37851 | 5.73E-18 |
| FAM111B  | brown | 0.423696 | 1.50E-22 | 0.173966 | 0.000118 | 0.451544 | 9.69E-26 |
| FAM133A  | brown | 0.285459 | 1.51E-10 | 0.150277 | 0.000901 | 0.337212 | 2.31E-14 |
| FAM135B  | brown | -0.17352 | 0.000123 | -0.0361  | 0.427592 | -0.17237 | 0.000136 |
| FAM161A  | brown | 0.241053 | 7.68E-08 | 0.231701 | 2.47E-07 | 0.421922 | 2.34E-22 |
| FAM187B  | brown | -0.18544 | 3.97E-05 | -0.1087  | 0.016625 | -0.21393 | 1.99E-06 |
| FAM189A  | brown | -0.264   | 3.55E-09 | -0.09297 | 0.040696 | -0.31272 | 1.83E-12 |
| FAM209A  | brown | 0.160658 | 0.000382 | -0.09205 | 0.042742 | 0.176723 | 9.13E-05 |
| FAM216A  | brown | 0.417017 | 7.91E-22 | 0.103487 | 0.022649 | 0.447299 | 3.10E-25 |
| FAM241B  | brown | 0.292821 | 4.81E-11 | -0.06932 | 0.127358 | 0.250588 | 2.22E-08 |
| FAM43B   | brown | -0.3287  | 1.11E-13 | -0.11672 | 0.010091 | -0.36219 | 1.76E-16 |
| FAM49B   | brown | 0.483986 | 7.59E-30 | 0.331534 | 6.61E-14 | 0.633723 | 7.93E-56 |
| FAM72A   | brown | 0.665725 | 2.11E-63 | 0.282455 | 2.39E-10 | 0.776909 | 4.18E-99 |
| FAM72B   | brown | 0.68542  | 1.50E-68 | 0.247876 | 3.18E-08 | 0.836285 | #####    |
| FAM72C   | brown | 0.544024 | 1.04E-38 | 0.26641  | 2.52E-09 | 0.645384 | 1.75E-58 |
| FAM72D   | brown | 0.624234 | 9.49E-54 | 0.25668  | 9.78E-09 | 0.708775 | 3.26E-75 |
| FAM83D   | brown | 0.703314 | 1.35E-73 | 0.239663 | 9.17E-08 | 0.838249 | #####    |
| FANCA    | brown | 0.538911 | 6.95E-38 | 0.074037 | 0.103414 | 0.596966 | 3.70E-48 |
| FANCB    | brown | 0.70984  | 1.56E-75 | 0.352326 | 1.27E-15 | 0.854415 | #####    |
| FANCD2   | brown | 0.687393 | 4.33E-69 | 0.167053 | 0.000219 | 0.815122 | #####    |
| FANCE    | brown | 0.571241 | 2.36E-43 | 0.161864 | 0.000345 | 0.635968 | 2.49E-56 |
| FANCI    | brown | 0.666769 | 1.15E-63 | 0.267312 | 2.22E-09 | 0.805043 | #####    |
| FAR2     | brown | 0.317078 | 8.66E-13 | 0.296684 | 2.60E-11 | 0.376584 | 8.68E-18 |
| FBLIM1   | brown | -0.48749 | 2.57E-30 | -0.10982 | 0.015539 | -0.35803 | 4.10E-16 |
| FBLN7    | brown | -0.25883 | 7.28E-09 | -0.19324 | 1.83E-05 | -0.24665 | 3.73E-08 |
| FBXO43   | brown | 0.371438 | 2.59E-17 | 0.106835 | 0.0186   | 0.427104 | 6.33E-23 |
| FBXO5    | brown | 0.670326 | 1.43E-64 | 0.316172 | 1.01E-12 | 0.868113 | #####    |
| FCER1A   | brown | -0.40323 | 2.18E-20 | -0.14023 | 0.001964 | -0.48287 | 1.07E-29 |
| FCGBP    | brown | -0.2932  | 4.53E-11 | -0.10537 | 0.02028  | -0.4522  | 8.07E-26 |
| FCGRT    | brown | -0.28893 | 8.85E-11 | -0.09893 | 0.029369 | -0.3415  | 1.03E-14 |
| FEN1     | brown | 0.654401 | 1.29E-60 | 0.228013 | 3.86E-07 | 0.686806 | 6.27E-69 |
| FGA      | brown | -0.10895 | 0.016384 | 0.016128 | 0.723125 | -0.19241 | 1.99E-05 |
| FGB      | brown | -0.11812 | 0.009222 | -0.01061 | 0.815629 | -0.20574 | 4.92E-06 |
| FGD4     | brown | 0.260331 | 5.92E-09 | 0.187179 | 3.35E-05 | 0.382381 | 2.47E-18 |
| FGD5     | brown | -0.41711 | 7.73E-22 | -0.15204 | 0.000782 | -0.39258 | 2.55E-19 |
| FGF11    | brown | 0.341752 | 9.85E-15 | 0.086731 | 0.056298 | 0.401829 | 3.03E-20 |
| FGGY     | brown | -0.1557  | 0.000579 | -0.05971 | 0.189253 | -0.30673 | 5.03E-12 |
| FHL2     | brown | -0.45108 | 1.10E-25 | -0.12436 | 0.006101 | -0.41549 | 1.15E-21 |
| FHOD3    | brown | -0.42308 | 1.75E-22 | -0.04487 | 0.324127 | -0.37232 | 2.15E-17 |
| FIGN     | brown | 0.127472 | 0.004931 | 0.038124 | 0.402185 | 0.340521 | 1.24E-14 |
| FLJ22447 | brown | -0.11794 | 0.009327 | 0.14136  | 0.001804 | -0.16243 | 0.000329 |
| FLJ30679 | brown | 0.192907 | 1.89E-05 | 0.003732 | 0.934672 | 0.240079 | 8.70E-08 |
| FMOD     | brown | -0.36077 | 2.36E-16 | -0.08569 | 0.059323 | -0.37881 | 5.37E-18 |
| FNDC5    | brown | 0.160501 | 0.000387 | 0.029652 | 0.51474  | 0.306811 | 4.96E-12 |
| FNDC8    | brown | 0.271034 | 1.30E-09 | 0.0868   | 0.056101 | 0.292954 | 4.71E-11 |
| FOCAD-A  | brown | 0.177526 | 8.47E-05 | 0.020392 | 0.654171 | 0.173722 | 0.00012  |
| FOXG1    | brown | 0.095385 | 0.035728 | 0.00204  | 0.964253 | 0.135556 | 0.002777 |
| FOXM1    | brown | 0.665194 | 2.86E-63 | 0.235176 | 1.61E-07 | 0.80258  | #####    |
| FOXP1    | brown | -0.4168  | 8.35E-22 | -0.14557 | 0.001306 | -0.41654 | 8.89E-22 |
| FOXRED2  | brown | 0.275511 | 6.76E-10 | -0.01581 | 0.728412 | 0.279226 | 3.89E-10 |

|          |       |          |          |          |          |          |          |
|----------|-------|----------|----------|----------|----------|----------|----------|
| FRG1     | brown | 0.358771 | 3.53E-16 | 0.244334 | 5.04E-08 | 0.441059 | 1.67E-24 |
| FRMD4A   | brown | -0.24686 | 3.63E-08 | -0.10246 | 0.024042 | -0.26848 | 1.88E-09 |
| FRMPD3   | brown | -0.16385 | 0.000291 | -0.10984 | 0.015522 | -0.17719 | 8.74E-05 |
| FUCA1    | brown | -0.35515 | 7.29E-16 | -0.02248 | 0.621426 | -0.51081 | 1.37E-33 |
| FUOM     | brown | 0.346856 | 3.71E-15 | 0.048899 | 0.282481 | 0.28509  | 1.60E-10 |
| FURIN    | brown | -0.35634 | 5.75E-16 | -0.14439 | 0.001431 | -0.32595 | 1.82E-13 |
| FYB2     | brown | -0.22382 | 6.37E-07 | 0.021247 | 0.640669 | -0.24389 | 5.34E-08 |
| FZD5     | brown | 0.252548 | 1.71E-08 | 0.126002 | 0.005455 | 0.293037 | 4.65E-11 |
| G0S2     | brown | -0.26073 | 5.60E-09 | -0.13853 | 0.002231 | -0.41044 | 3.92E-21 |
| GAA      | brown | -0.18134 | 5.90E-05 | -0.11673 | 0.010084 | -0.18374 | 4.69E-05 |
| GADD45B  | brown | -0.39634 | 1.08E-19 | -0.19549 | 1.45E-05 | -0.41736 | 7.27E-22 |
| GADD45G  | brown | -0.33989 | 1.40E-14 | -0.26125 | 5.21E-09 | -0.53821 | 9.01E-38 |
| GALNT6   | brown | -0.1041  | 0.021861 | 0.051472 | 0.257894 | -0.26117 | 5.27E-09 |
| GAPDH    | brown | 0.45141  | 1.01E-25 | 0.173027 | 0.000128 | 0.439716 | 2.38E-24 |
| GAS2L3   | brown | 0.637449 | 1.16E-56 | 0.284511 | 1.75E-10 | 0.809561 | #####    |
| GAS6     | brown | -0.36945 | 3.93E-17 | -0.26898 | 1.75E-09 | -0.39261 | 2.53E-19 |
| GCH1     | brown | 0.359433 | 3.09E-16 | 0.246957 | 3.58E-08 | 0.409344 | 5.11E-21 |
| GEN1     | brown | 0.439441 | 2.56E-24 | 0.134423 | 0.003015 | 0.556629 | 8.30E-41 |
| GFI1B    | brown | -0.05603 | 0.218041 | -0.02515 | 0.580646 | -0.14173 | 0.001753 |
| GFY      | brown | 0.252635 | 1.69E-08 | 0.134653 | 0.002965 | 0.274538 | 7.80E-10 |
| GGH      | brown | 0.26683  | 2.38E-09 | 0.287751 | 1.06E-10 | 0.439505 | 2.52E-24 |
| GGT1     | brown | -0.14311 | 0.001579 | -0.16369 | 0.000295 | -0.35    | 2.01E-15 |
| GHET1    | brown | 0.294258 | 3.83E-11 | 0.082443 | 0.069673 | 0.330079 | 8.61E-14 |
| GIN1     | brown | 0.690893 | 4.68E-70 | 0.308728 | 3.60E-12 | 0.854684 | #####    |
| GIN2     | brown | 0.611931 | 3.69E-51 | 0.237591 | 1.19E-07 | 0.6827   | 8.13E-68 |
| GIN3     | brown | 0.475029 | 1.14E-28 | 0.248554 | 2.91E-08 | 0.474288 | 1.43E-28 |
| GIN4     | brown | 0.594334 | 1.20E-47 | 0.226952 | 4.39E-07 | 0.754929 | 1.53E-90 |
| GJB1     | brown | -0.15041 | 0.000891 | -0.0818  | 0.071893 | -0.35738 | 4.67E-16 |
| GMNN     | brown | 0.698254 | 3.93E-72 | 0.32936  | 9.82E-14 | 0.794233 | #####    |
| GMPR     | brown | -0.12684 | 0.00515  | -0.2211  | 8.76E-07 | -0.30667 | 5.08E-12 |
| GNG13    | brown | 0.268296 | 1.93E-09 | 0.014905 | 0.743353 | 0.250195 | 2.34E-08 |
| GNG3     | brown | 0.305087 | 6.61E-12 | 0.061922 | 0.173365 | 0.31201  | 2.07E-12 |
| GPATCH4  | brown | 0.520564 | 4.91E-35 | 0.107699 | 0.017663 | 0.388454 | 6.45E-19 |
| GPRI1    | brown | -0.35396 | 9.24E-16 | -0.17746 | 8.52E-05 | -0.50643 | 5.90E-33 |
| GPR137C  | brown | 0.187878 | 3.13E-05 | 0.071632 | 0.115143 | 0.404437 | 1.64E-20 |
| GPR160   | brown | 0.23881  | 1.02E-07 | 0.192157 | 2.04E-05 | 0.207161 | 4.22E-06 |
| GPR19    | brown | 0.407861 | 7.28E-21 | 0.158453 | 0.000461 | 0.495841 | 1.85E-31 |
| GPR62    | brown | 0.269535 | 1.61E-09 | 0.003973 | 0.930463 | 0.279528 | 3.72E-10 |
| GPSM2    | brown | 0.561437 | 1.25E-41 | 0.290708 | 6.70E-11 | 0.739162 | 6.11E-85 |
| GPX2     | brown | -0.24917 | 2.68E-08 | 0.010102 | 0.824381 | -0.42818 | 4.81E-23 |
| GRAMD2E  | brown | -0.22067 | 9.21E-07 | 0.028438 | 0.532101 | -0.23628 | 1.40E-07 |
| GRAMD4   | brown | -0.1263  | 0.005345 | -0.10911 | 0.016221 | -0.20005 | 9.03E-06 |
| GRK3     | brown | -0.22944 | 3.25E-07 | -0.08649 | 0.056991 | -0.29098 | 6.42E-11 |
| GSN      | brown | -0.48043 | 2.25E-29 | -0.1637  | 0.000294 | -0.38815 | 6.89E-19 |
| GSTCD    | brown | 0.363638 | 1.31E-16 | 0.287997 | 1.02E-10 | 0.527986 | 3.63E-36 |
| GSTCD-A' | brown | 0.234558 | 1.74E-07 | 0.12436  | 0.0061   | 0.321553 | 3.96E-13 |
| GTF3C2-A | brown | 0.339792 | 1.43E-14 | 0.085161 | 0.060926 | 0.377206 | 7.59E-18 |
| GTSE1    | brown | 0.637091 | 1.39E-56 | 0.168526 | 0.000193 | 0.768956 | 6.75E-96 |
| GTSE1-DT | brown | 0.263026 | 4.07E-09 | 0.019786 | 0.663813 | 0.206106 | 4.73E-06 |
| GUSBP2   | brown | 0.339819 | 1.42E-14 | 0.051619 | 0.256533 | 0.359586 | 2.99E-16 |
| H2AC14   | brown | 0.277139 | 5.31E-10 | 0.067987 | 0.134881 | 0.286289 | 1.33E-10 |
| H2AX     | brown | 0.321531 | 3.98E-13 | 0.056681 | 0.212749 | 0.387388 | 8.18E-19 |
| H2AZ1    | brown | 0.555087 | 1.52E-40 | 0.265988 | 2.68E-09 | 0.667057 | 9.72E-64 |
| H2BC13   | brown | 0.431575 | 2.01E-23 | 0.091637 | 0.043682 | 0.377969 | 6.44E-18 |
| H2BC17   | brown | 0.465422 | 1.92E-27 | 0.15866  | 0.000453 | 0.476128 | 8.23E-29 |
| H3C12    | brown | 0.327907 | 1.28E-13 | 0.146996 | 0.001168 | 0.358672 | 3.60E-16 |
| H3P47    | brown | 0.207956 | 3.86E-06 | 0.177946 | 8.14E-05 | 0.192775 | 1.91E-05 |
| H4C3     | brown | 0.409407 | 5.03E-21 | 0.094701 | 0.03708  | 0.381278 | 3.14E-18 |

|           |       |          |          |          |          |          |          |
|-----------|-------|----------|----------|----------|----------|----------|----------|
| HASPIN    | brown | 0.671379 | 7.70E-65 | 0.263273 | 3.93E-09 | 0.765823 | 1.14E-94 |
| HAUS8     | brown | 0.570957 | 2.65E-43 | 0.106052 | 0.019485 | 0.630037 | 5.19E-55 |
| HBA1      | brown | -0.26912 | 1.71E-09 | -0.1233  | 0.006554 | -0.36063 | 2.42E-16 |
| HBA2      | brown | -0.19821 | 1.09E-05 | -0.10922 | 0.016111 | -0.25343 | 1.52E-08 |
| HBB       | brown | -0.22012 | 9.81E-07 | -0.05949 | 0.190898 | -0.23953 | 9.32E-08 |
| HCG20     | brown | -0.23395 | 1.87E-07 | -0.00383 | 0.933035 | -0.27421 | 8.19E-10 |
| HCG9      | brown | -0.11541 | 0.010975 | -0.04817 | 0.28973  | -0.1964  | 1.32E-05 |
| HDAC11-   | brown | 0.293591 | 4.26E-11 | 0.085633 | 0.059501 | 0.322998 | 3.07E-13 |
| HELLS     | brown | 0.518317 | 1.07E-34 | 0.205737 | 4.92E-06 | 0.655487 | 7.04E-61 |
| HES5      | brown | -0.32774 | 1.31E-13 | -0.11223 | 0.013398 | -0.39626 | 1.10E-19 |
| HESX1     | brown | 0.357825 | 4.27E-16 | 0.143369 | 0.001548 | 0.423845 | 1.45E-22 |
| HHAT      | brown | -0.3228  | 3.18E-13 | -0.131   | 0.003852 | -0.39628 | 1.10E-19 |
| HJURP     | brown | 0.65039  | 1.17E-59 | 0.130534 | 0.003982 | 0.795142 | #####    |
| HLTF      | brown | 0.445795 | 4.67E-25 | 0.249441 | 2.59E-08 | 0.587381 | 2.56E-46 |
| HMGA1     | brown | 0.468537 | 7.77E-28 | 0.218959 | 1.12E-06 | 0.55843  | 4.09E-41 |
| HMGB2     | brown | 0.597278 | 3.21E-48 | 0.129921 | 0.004157 | 0.748631 | 2.96E-88 |
| HMGB3     | brown | 0.35836  | 3.83E-16 | 0.22289  | 7.10E-07 | 0.493208 | 4.27E-31 |
| HMGCS1    | brown | 0.384746 | 1.47E-18 | 0.357278 | 4.76E-16 | 0.531654 | 9.77E-37 |
| HMGN2     | brown | 0.441322 | 1.55E-24 | 0.183583 | 4.76E-05 | 0.56207  | 9.68E-42 |
| HMGN3-    | brown | 0.29557  | 3.11E-11 | 0.164932 | 0.000264 | 0.339432 | 1.53E-14 |
| HMMR      | brown | 0.634    | 6.88E-56 | 0.344954 | 5.35E-15 | 0.823089 | #####    |
| HNF1B     | brown | -0.14361 | 0.00152  | -0.10378 | 0.02227  | -0.22199 | 7.89E-07 |
| HOMER1    | brown | 0.302506 | 1.01E-11 | 0.287167 | 1.16E-10 | 0.497817 | 9.81E-32 |
| HOOK1     | brown | 0.405134 | 1.39E-20 | 0.262704 | 4.25E-09 | 0.474378 | 1.39E-28 |
| HORMAD    | brown | 0.221669 | 8.20E-07 | 0.091089 | 0.04496  | 0.228773 | 3.53E-07 |
| HP        | brown | -0.32872 | 1.10E-13 | -0.11779 | 0.009422 | -0.4583  | 1.47E-26 |
| HPR       | brown | -0.23121 | 2.62E-07 | -0.09864 | 0.029849 | -0.32984 | 8.99E-14 |
| HRAT92    | brown | -0.19853 | 1.06E-05 | -0.15407 | 0.000662 | -0.24682 | 3.65E-08 |
| HRC       | brown | -0.22922 | 3.34E-07 | -0.14731 | 0.00114  | -0.31169 | 2.18E-12 |
| HROB      | brown | 0.651307 | 7.08E-60 | 0.171434 | 0.000148 | 0.731035 | 3.29E-82 |
| HSF2BP    | brown | 0.470646 | 4.19E-28 | 0.163275 | 0.000305 | 0.526642 | 5.84E-36 |
| HSPB8     | brown | -0.35411 | 8.97E-16 | -0.05027 | 0.269193 | -0.37308 | 1.83E-17 |
| HSPD1     | brown | 0.588209 | 1.79E-46 | 0.372666 | 2.00E-17 | 0.669001 | 3.12E-64 |
| HYLS1     | brown | 0.342617 | 8.36E-15 | 0.158851 | 0.000445 | 0.344103 | 6.29E-15 |
| ICOSLG    | brown | 0.273869 | 8.60E-10 | 0.059575 | 0.190269 | 0.301256 | 1.24E-11 |
| ID1       | brown | -0.47081 | 3.99E-28 | -0.18518 | 4.07E-05 | -0.45551 | 3.22E-26 |
| ID3       | brown | -0.54542 | 6.15E-39 | -0.18024 | 6.55E-05 | -0.48519 | 5.23E-30 |
| IDI2-AS1  | brown | 0.255315 | 1.18E-08 | 0.085074 | 0.06119  | 0.273667 | 8.86E-10 |
| IDUA      | brown | -0.40207 | 2.86E-20 | -0.38588 | 1.14E-18 | -0.59371 | 1.58E-47 |
| IFFO2     | brown | -0.32952 | 9.53E-14 | 0.009831 | 0.82902  | -0.33533 | 3.28E-14 |
| IFITM2    | brown | -0.45705 | 2.09E-26 | -0.21413 | 1.95E-06 | -0.51884 | 8.93E-35 |
| IGF1R     | brown | -0.27845 | 4.37E-10 | -0.06632 | 0.14475  | -0.26673 | 2.41E-09 |
| IGF2BP3   | brown | 0.297079 | 2.44E-11 | 0.134834 | 0.002927 | 0.371093 | 2.79E-17 |
| IGFBP4    | brown | -0.58716 | 2.83E-46 | -0.13989 | 0.002016 | -0.62322 | 1.57E-53 |
| IGIP      | brown | -0.28549 | 1.51E-10 | -0.12208 | 0.007111 | -0.29933 | 1.70E-11 |
| IGSF22    | brown | -0.09911 | 0.029072 | -0.17102 | 0.000154 | -0.32696 | 1.51E-13 |
| IL12A-AS1 | brown | -0.08457 | 0.062741 | -0.02352 | 0.605285 | -0.09677 | 0.033118 |
| IL17D     | brown | 0.175799 | 9.94E-05 | 0.072722 | 0.109705 | 0.291405 | 6.01E-11 |
| IL1R1     | brown | -0.37691 | 8.08E-18 | 0.058579 | 0.1978   | -0.38163 | 2.91E-18 |
| IL33      | brown | -0.4461  | 4.30E-25 | -0.03367 | 0.459417 | -0.41237 | 2.46E-21 |
| ILDR1     | brown | -0.13611 | 0.002667 | -0.0686  | 0.131369 | -0.3655  | 8.95E-17 |
| IMPA2     | brown | 0.445989 | 4.43E-25 | 0.239894 | 8.90E-08 | 0.445417 | 5.17E-25 |
| INCENP    | brown | 0.495568 | 2.02E-31 | 0.119518 | 0.00842  | 0.579862 | 6.46E-45 |
| INHBB     | brown | -0.2585  | 7.62E-09 | 0.003056 | 0.946475 | -0.25085 | 2.14E-08 |
| INHBC     | brown | 0.271136 | 1.28E-09 | -0.02903 | 0.523651 | 0.306461 | 5.26E-12 |
| INHBE     | brown | 0.293399 | 4.39E-11 | 0.098044 | 0.030863 | 0.367686 | 5.68E-17 |
| INSYN1    | brown | -0.29722 | 2.39E-11 | -0.09567 | 0.035169 | -0.29634 | 2.75E-11 |
| IPO9-AS1  | brown | 0.353947 | 9.25E-16 | -0.02656 | 0.559518 | 0.32745  | 1.39E-13 |

|          |       |          |          |          |          |          |          |
|----------|-------|----------|----------|----------|----------|----------|----------|
| IQCN     | brown | -0.32434 | 2.42E-13 | -0.32139 | 4.08E-13 | -0.30951 | 3.16E-12 |
| IQGAP3   | brown | 0.503872 | 1.37E-32 | 0.061367 | 0.177258 | 0.623502 | 1.36E-53 |
| IRAK1    | brown | 0.48492  | 5.69E-30 | 0.183694 | 4.71E-05 | 0.449503 | 1.70E-25 |
| JPT1     | brown | 0.386672 | 9.59E-19 | 0.246325 | 3.89E-08 | 0.423688 | 1.50E-22 |
| KAAG1    | brown | 0.19885  | 1.02E-05 | 0.045523 | 0.317082 | 0.211861 | 2.51E-06 |
| KBTBD11  | brown | 0.229316 | 3.30E-07 | 0.103461 | 0.022683 | 0.243406 | 5.68E-08 |
| KBTBD8   | brown | 0.370191 | 3.37E-17 | 0.223921 | 6.29E-07 | 0.380064 | 4.09E-18 |
| KCNC4    | brown | -0.18499 | 4.15E-05 | -0.12709 | 0.005062 | -0.29377 | 4.14E-11 |
| KCND3    | brown | -0.41382 | 1.73E-21 | -0.12836 | 0.004636 | -0.37043 | 3.20E-17 |
| KCNE2    | brown | 0.31056  | 2.64E-12 | 0.072575 | 0.110425 | 0.390632 | 3.96E-19 |
| KCNG3    | brown | 0.32457  | 2.32E-13 | 0.155352 | 0.000596 | 0.373671 | 1.62E-17 |
| KCNIP4   | brown | 0.175405 | 0.000103 | 0.124731 | 0.005949 | 0.324622 | 2.30E-13 |
| KCNJ15   | brown | -0.19278 | 1.91E-05 | -0.06217 | 0.171677 | -0.2279  | 3.92E-07 |
| KCNK6    | brown | -0.38831 | 6.66E-19 | -0.12107 | 0.007604 | -0.57253 | 1.39E-43 |
| KCNMB3   | brown | 0.345197 | 5.10E-15 | 0.059368 | 0.191814 | 0.385324 | 1.29E-18 |
| KCNQ1    | brown | -0.25707 | 9.27E-09 | -0.13171 | 0.003664 | -0.401   | 3.68E-20 |
| KCNQ4    | brown | 0.370696 | 3.03E-17 | 0.01483  | 0.744593 | 0.285265 | 1.56E-10 |
| KCTD21   | brown | 0.319803 | 5.39E-13 | 0.063971 | 0.159542 | 0.368874 | 4.44E-17 |
| KCTD9    | brown | 0.247085 | 3.52E-08 | 0.244969 | 4.64E-08 | 0.370833 | 2.94E-17 |
| KDM4D    | brown | 0.367193 | 6.30E-17 | 0.079899 | 0.07877  | 0.382036 | 2.66E-18 |
| KHDC1L   | brown | 0.156002 | 0.000565 | 0.054602 | 0.23003  | 0.210252 | 3.00E-06 |
| KIAA1586 | brown | 0.32027  | 4.97E-13 | 0.233883 | 1.89E-07 | 0.500121 | 4.66E-32 |
| KIF11    | brown | 0.682032 | 1.23E-67 | 0.279238 | 3.88E-10 | 0.87111  | #####    |
| KIF14    | brown | 0.656261 | 4.58E-61 | 0.307764 | 4.23E-12 | 0.841916 | #####    |
| KIF15    | brown | 0.691519 | 3.14E-70 | 0.266303 | 2.56E-09 | 0.891914 | #####    |
| KIF18A   | brown | 0.691537 | 3.10E-70 | 0.292615 | 4.97E-11 | 0.864693 | #####    |
| KIF18B   | brown | 0.627848 | 1.56E-54 | 0.124522 | 0.006034 | 0.771948 | 4.34E-97 |
| KIF20A   | brown | 0.616028 | 5.22E-52 | 0.184366 | 4.41E-05 | 0.738674 | 8.97E-85 |
| KIF20B   | brown | 0.615959 | 5.39E-52 | 0.296891 | 2.51E-11 | 0.787439 | #####    |
| KIF22    | brown | 0.576498 | 2.67E-44 | 0.083443 | 0.066344 | 0.638236 | 7.67E-57 |
| KIF23    | brown | 0.690714 | 5.25E-70 | 0.250323 | 2.30E-08 | 0.855932 | #####    |
| KIF2C    | brown | 0.743211 | 2.44E-86 | 0.196555 | 1.30E-05 | 0.869043 | #####    |
| KIF4A    | brown | 0.695028 | 3.25E-71 | 0.255925 | 1.08E-08 | 0.830677 | #####    |
| KIF4B    | brown | 0.373105 | 1.82E-17 | 0.161038 | 0.00037  | 0.371516 | 2.55E-17 |
| KIFC1    | brown | 0.652475 | 3.73E-60 | 0.084989 | 0.061449 | 0.753825 | 3.89E-90 |
| KLC3     | brown | 0.445117 | 5.61E-25 | 0.12181  | 0.007238 | 0.453764 | 5.24E-26 |
| KLF1     | brown | 0.361415 | 2.07E-16 | 0.064705 | 0.154798 | 0.269735 | 1.57E-09 |
| KLHL14   | brown | 0.246468 | 3.82E-08 | 0.018564 | 0.683414 | 0.316584 | 9.44E-13 |
| KLHL15   | brown | 0.319176 | 6.01E-13 | 0.267742 | 2.09E-09 | 0.481713 | 1.52E-29 |
| KLHL23   | brown | 0.349494 | 2.22E-15 | 0.202247 | 7.16E-06 | 0.526663 | 5.80E-36 |
| KLHL3    | brown | -0.2459  | 4.11E-08 | -0.14042 | 0.001936 | -0.36081 | 2.33E-16 |
| KLK1     | brown | -0.18144 | 5.85E-05 | -0.09681 | 0.03305  | -0.26871 | 1.82E-09 |
| KLK15    | brown | -0.07262 | 0.110186 | -0.06895 | 0.129406 | -0.15163 | 0.000808 |
| KLK2     | brown | -0.23249 | 2.24E-07 | -0.14577 | 0.001285 | -0.33554 | 3.16E-14 |
| KLK3     | brown | -0.15613 | 0.000559 | -0.07546 | 0.096943 | -0.18046 | 6.42E-05 |
| KLK4     | brown | -0.3562  | 5.92E-16 | -0.16141 | 0.000359 | -0.49851 | 7.84E-32 |
| KLKP1    | brown | -0.33535 | 3.28E-14 | -0.17477 | 0.000109 | -0.43346 | 1.23E-23 |
| KNL1     | brown | 0.636951 | 1.50E-56 | 0.312159 | 2.02E-12 | 0.819458 | #####    |
| KNSTRN   | brown | 0.694551 | 4.43E-71 | 0.251408 | 1.99E-08 | 0.772864 | 1.86E-97 |
| KNTC1    | brown | 0.493909 | 3.42E-31 | 0.137905 | 0.002336 | 0.622372 | 2.38E-53 |
| KPNA2    | brown | 0.590972 | 5.33E-47 | 0.334854 | 3.59E-14 | 0.735592 | 9.96E-84 |
| KREMEN2  | brown | 0.247729 | 3.24E-08 | 0.04398  | 0.333775 | 0.20094  | 8.22E-06 |
| KSR1     | brown | -0.25302 | 1.61E-08 | -0.1581  | 0.000474 | -0.24682 | 3.65E-08 |
| KTN1-AS1 | brown | 0.54149  | 2.68E-38 | 0.115088 | 0.011198 | 0.507711 | 3.86E-33 |
| L2HGDH   | brown | 0.626261 | 3.46E-54 | 0.296346 | 2.74E-11 | 0.66105  | 3.08E-62 |
| LACTB2   | brown | 0.489263 | 1.48E-30 | 0.320932 | 4.42E-13 | 0.524802 | 1.12E-35 |
| LBR      | brown | 0.370434 | 3.20E-17 | 0.327654 | 1.34E-13 | 0.56647  | 1.65E-42 |
| LCTL     | brown | 0.328562 | 1.13E-13 | 0.170848 | 0.000156 | 0.427686 | 5.46E-23 |

|          |       |          |          |          |          |          |          |
|----------|-------|----------|----------|----------|----------|----------|----------|
| LDHA     | brown | 0.357217 | 4.82E-16 | 0.225979 | 4.93E-07 | 0.398298 | 6.89E-20 |
| LDHB     | brown | 0.298203 | 2.04E-11 | 0.243887 | 5.34E-08 | 0.392851 | 2.40E-19 |
| LDLRAD4  | brown | -0.62128 | 4.07E-53 | -0.17637 | 9.43E-05 | -0.50517 | 8.94E-33 |
| LIN9     | brown | 0.601415 | 4.93E-49 | 0.317869 | 7.55E-13 | 0.762005 | 3.38E-93 |
| LINC0009 | brown | -0.33197 | 6.10E-14 | -0.28004 | 3.44E-10 | -0.43466 | 9.02E-24 |
| LINC0024 | brown | -0.10953 | 0.015816 | -0.10119 | 0.025852 | -0.18112 | 6.03E-05 |
| LINC0044 | brown | 0.245201 | 4.51E-08 | 0.149854 | 0.000932 | 0.255221 | 1.19E-08 |
| LINC0047 | brown | 0.437601 | 4.17E-24 | 0.098959 | 0.029326 | 0.479358 | 3.11E-29 |
| LINC0048 | brown | -0.09394 | 0.038644 | -0.0586  | 0.197654 | -0.16361 | 0.000297 |
| LINC0056 | brown | -0.24637 | 3.87E-08 | -0.15535 | 0.000596 | -0.29307 | 4.62E-11 |
| LINC0061 | brown | 0.255328 | 1.17E-08 | 0.014764 | 0.745696 | 0.284772 | 1.68E-10 |
| LINC0063 | brown | 0.467156 | 1.16E-27 | 0.023947 | 0.598819 | 0.371391 | 2.62E-17 |
| LINC0066 | brown | 0.235244 | 1.60E-07 | -0.00485 | 0.915092 | 0.275601 | 6.67E-10 |
| LINC0066 | brown | 0.252912 | 1.63E-08 | 0.158935 | 0.000442 | 0.282349 | 2.43E-10 |
| LINC0094 | brown | -0.1898  | 2.58E-05 | -0.13266 | 0.003423 | -0.27078 | 1.35E-09 |
| LINC0099 | brown | -0.16852 | 0.000193 | -0.02779 | 0.541427 | -0.17913 | 7.28E-05 |
| LINC0101 | brown | 0.341322 | 1.07E-14 | 0.013451 | 0.767629 | 0.324136 | 2.51E-13 |
| LINC0106 | brown | 0.093425 | 0.039719 | 0.114827 | 0.011385 | 0.134802 | 0.002933 |
| LINC0106 | brown | 0.414188 | 1.58E-21 | 0.135587 | 0.002771 | 0.369327 | 4.04E-17 |
| LINC0106 | brown | 0.18363  | 4.74E-05 | 0.092425 | 0.041896 | 0.242212 | 6.63E-08 |
| LINC0112 | brown | 0.380272 | 3.91E-18 | 0.12036  | 0.007967 | 0.382435 | 2.44E-18 |
| LINC0122 | brown | 0.319822 | 5.37E-13 | 0.108687 | 0.016643 | 0.410895 | 3.52E-21 |
| LINC0123 | brown | 0.324978 | 2.16E-13 | 0.13815  | 0.002294 | 0.386841 | 9.24E-19 |
| LINC0135 | brown | 0.385028 | 1.38E-18 | 0.050803 | 0.264147 | 0.328797 | 1.09E-13 |
| LINC0140 | brown | 0.357364 | 4.68E-16 | 0.057998 | 0.202292 | 0.388607 | 6.23E-19 |
| LINC0154 | brown | 0.268806 | 1.79E-09 | 0.119328 | 0.008525 | 0.292386 | 5.15E-11 |
| LINC0155 | brown | 0.126248 | 0.005364 | 0.032716 | 0.472242 | 0.145563 | 0.001306 |
| LINC0157 | brown | 0.265693 | 2.79E-09 | 0.078445 | 0.084389 | 0.356159 | 5.96E-16 |
| LINC0160 | brown | -0.24551 | 4.33E-08 | -0.04381 | 0.3356   | -0.3544  | 8.46E-16 |
| LINC0169 | brown | 0.347094 | 3.54E-15 | 0.065707 | 0.148493 | 0.35656  | 5.50E-16 |
| LINC0169 | brown | 0.242363 | 6.50E-08 | 0.059754 | 0.188937 | 0.328915 | 1.06E-13 |
| LINC0175 | brown | -0.24347 | 5.64E-08 | -0.14303 | 0.001588 | -0.25156 | 1.95E-08 |
| LINC0177 | brown | 0.331305 | 6.89E-14 | 0.077112 | 0.089818 | 0.368098 | 5.22E-17 |
| LINC0184 | brown | 0.084233 | 0.063805 | 0.042009 | 0.355923 | 0.143371 | 0.001547 |
| LINC0184 | brown | 0.286825 | 1.23E-10 | 0.095101 | 0.036285 | 0.277724 | 4.87E-10 |
| LINC0187 | brown | 0.162749 | 0.00032  | 0.099484 | 0.028474 | 0.220713 | 9.16E-07 |
| LINC0204 | brown | 0.359483 | 3.06E-16 | 0.013556 | 0.765862 | 0.32963  | 9.35E-14 |
| LINC0206 | brown | 0.231588 | 2.51E-07 | 0.01451  | 0.749925 | 0.212836 | 2.25E-06 |
| LINC0215 | brown | 0.18318  | 4.95E-05 | 0.105267 | 0.02041  | 0.25977  | 6.40E-09 |
| LINC0245 | brown | 0.352503 | 1.23E-15 | 0.110769 | 0.014661 | 0.398106 | 7.20E-20 |
| LINC0265 | brown | -0.15622 | 0.000555 | 0.019775 | 0.663983 | -0.22809 | 3.83E-07 |
| LINC0271 | brown | -0.15844 | 0.000461 | 0.012192 | 0.788846 | -0.20295 | 6.64E-06 |
| LINC0286 | brown | 0.22167  | 8.20E-07 | 0.005173 | 0.909535 | 0.23403  | 1.86E-07 |
| LINGO4   | brown | -0.1441  | 0.001464 | -0.14932 | 0.000972 | -0.31856 | 6.70E-13 |
| LMNB1    | brown | 0.606471 | 4.79E-50 | 0.254877 | 1.25E-08 | 0.805958 | #####    |
| LMNB2    | brown | 0.450968 | 1.14E-25 | 0.09927  | 0.028819 | 0.57065  | 3.01E-43 |
| LOC10012 | brown | -0.0503  | 0.268865 | -0.07273 | 0.10968  | -0.09713 | 0.032465 |
| LOC10013 | brown | 0.390986 | 3.65E-19 | -0.03836 | 0.399251 | 0.426551 | 7.29E-23 |
| LOC10028 | brown | 0.377427 | 7.24E-18 | 0.08958  | 0.048647 | 0.38895  | 5.77E-19 |
| LOC10028 | brown | 0.60204  | 3.70E-49 | 0.088548 | 0.051312 | 0.681225 | 2.02E-67 |
| LOC10050 | brown | 0.108309 | 0.017027 | 0.085593 | 0.059623 | 0.161207 | 0.000365 |
| LOC10050 | brown | 0.478783 | 3.70E-29 | 0.131521 | 0.003713 | 0.457479 | 1.85E-26 |
| LOC10050 | brown | 0.370109 | 3.43E-17 | 0.10763  | 0.017736 | 0.406995 | 8.95E-21 |
| LOC10155 | brown | 0.384589 | 1.52E-18 | 0.152662 | 0.000743 | 0.342896 | 7.92E-15 |
| LOC10192 | brown | 0.270337 | 1.44E-09 | 0.040369 | 0.375028 | 0.291311 | 6.10E-11 |
| LOC10192 | brown | 0.270542 | 1.40E-09 | -0.015   | 0.741787 | 0.305136 | 6.55E-12 |
| LOC10192 | brown | 0.384197 | 1.66E-18 | 0.016729 | 0.713248 | 0.359571 | 3.00E-16 |
| LOC10192 | brown | 0.188172 | 3.04E-05 | 0.005397 | 0.905638 | 0.296246 | 2.79E-11 |

|                |          |          |          |          |          |          |
|----------------|----------|----------|----------|----------|----------|----------|
| LOC10192 brown | 0.404813 | 1.50E-20 | 0.077908 | 0.086542 | 0.424136 | 1.34E-22 |
| LOC10192 brown | 0.618888 | 1.31E-52 | 0.169647 | 0.000174 | 0.593157 | 2.03E-47 |
| LOC10192 brown | -0.1917  | 2.13E-05 | -0.06511 | 0.152249 | -0.26288 | 4.15E-09 |
| LOC10192 brown | 0.191145 | 2.26E-05 | 0.092988 | 0.040659 | 0.281679 | 2.69E-10 |
| LOC10192 brown | 0.206039 | 4.76E-06 | 0.193592 | 1.76E-05 | 0.249756 | 2.48E-08 |
| LOC10192 brown | 0.421851 | 2.38E-22 | 0.04391  | 0.334551 | 0.383502 | 1.93E-18 |
| LOC10192 brown | 0.508577 | 2.89E-33 | 0.184272 | 4.45E-05 | 0.493677 | 3.68E-31 |
| LOC10192 brown | 0.361674 | 1.96E-16 | 0.094849 | 0.036784 | 0.366466 | 7.32E-17 |
| LOC10192 brown | 0.238468 | 1.07E-07 | 0.039494 | 0.38547  | 0.298941 | 1.81E-11 |
| LOC10254 brown | -0.11349 | 0.012386 | -0.06197 | 0.173025 | -0.13867 | 0.002207 |
| LOC10272 brown | 0.193208 | 1.83E-05 | 0.034454 | 0.449027 | 0.200289 | 8.80E-06 |
| LOC10272 brown | 0.399747 | 4.92E-20 | 0.161428 | 0.000358 | 0.446788 | 3.57E-25 |
| LOC10272 brown | 0.267459 | 2.17E-09 | -0.01274 | 0.779602 | 0.229024 | 3.42E-07 |
| LOC10272 brown | 0.473243 | 1.94E-28 | 0.223642 | 6.50E-07 | 0.370815 | 2.95E-17 |
| LOC10527 brown | 0.26019  | 6.04E-09 | 0.078946 | 0.082418 | 0.309854 | 2.98E-12 |
| LOC10536 brown | 0.2032   | 6.46E-06 | 0.157732 | 0.000489 | 0.187241 | 3.33E-05 |
| LOC10537 brown | -0.31018 | 2.82E-12 | -0.08728 | 0.054737 | -0.36161 | 1.98E-16 |
| LOC10537 brown | -0.04329 | 0.341452 | -0.05747 | 0.206435 | -0.23205 | 2.37E-07 |
| LOC10537 brown | 0.320095 | 5.12E-13 | 0.037792 | 0.406298 | 0.333022 | 5.03E-14 |
| LOC10537 brown | 0.305926 | 5.75E-12 | -0.01172 | 0.796896 | 0.282761 | 2.28E-10 |
| LOC10537 brown | 0.413996 | 1.66E-21 | 0.131155 | 0.00381  | 0.410168 | 4.19E-21 |
| LOC10537 brown | 0.328121 | 1.23E-13 | 0.069985 | 0.123762 | 0.382717 | 2.30E-18 |
| LOC10537 brown | 0.198015 | 1.12E-05 | -0.04797 | 0.291762 | 0.206279 | 4.64E-06 |
| LOC10537 brown | 0.131924 | 0.003608 | -0.02492 | 0.584076 | 0.151455 | 0.000819 |
| LOC10537 brown | 0.35054  | 1.81E-15 | 0.058846 | 0.195759 | 0.323506 | 2.81E-13 |
| LOC10669 brown | 0.21946  | 1.06E-06 | 0.101009 | 0.026118 | 0.293667 | 4.21E-11 |
| LOC10798 brown | 0.373988 | 1.51E-17 | 0.039098 | 0.390259 | 0.381772 | 2.82E-18 |
| LOC10798 brown | 0.305011 | 6.69E-12 | 0.078389 | 0.084611 | 0.326625 | 1.61E-13 |
| LOC1487C brown | 0.260579 | 5.72E-09 | 0.066806 | 0.141807 | 0.300031 | 1.51E-11 |
| LOC22072 brown | 0.327477 | 1.38E-13 | 0.009926 | 0.827393 | 0.454326 | 4.48E-26 |
| LOC28317 brown | -0.32175 | 3.83E-13 | -0.1512  | 0.000836 | -0.48554 | 4.71E-30 |
| LOC40112 brown | 0.252069 | 1.82E-08 | -0.05355 | 0.239127 | 0.239118 | 9.82E-08 |
| LOC44034 brown | 0.233485 | 1.98E-07 | 0.063332 | 0.163758 | 0.21461  | 1.84E-06 |
| LOC64136 brown | 0.351103 | 1.62E-15 | 0.142225 | 0.001689 | 0.393622 | 2.01E-19 |
| LOC72897 brown | 0.367217 | 6.27E-17 | 0.261691 | 4.90E-09 | 0.330209 | 8.41E-14 |
| LOC7301C brown | 0.253691 | 1.47E-08 | 0.159833 | 0.00041  | 0.367876 | 5.46E-17 |
| LOC73115 brown | 0.25704  | 9.31E-09 | 0.030521 | 0.502491 | 0.222638 | 7.32E-07 |
| LPAL2 brown    | -0.14212 | 0.001703 | -0.06956 | 0.126088 | -0.17395 | 0.000118 |
| LPAR6 brown    | -0.48275 | 1.11E-29 | -0.1101  | 0.015274 | -0.42536 | 9.86E-23 |
| LPL brown      | -0.30395 | 7.98E-12 | 0.013378 | 0.768855 | -0.31227 | 1.98E-12 |
| LRATD2 brown   | 0.256008 | 1.07E-08 | 0.177458 | 8.52E-05 | 0.369894 | 3.59E-17 |
| LRCOL1 brown   | -0.29388 | 4.07E-11 | -0.20143 | 7.80E-06 | -0.35734 | 4.71E-16 |
| LRIF1 brown    | 0.20714  | 4.22E-06 | 0.239323 | 9.57E-08 | 0.317442 | 8.13E-13 |
| LRR1 brown     | 0.703491 | 1.20E-73 | 0.38582  | 1.16E-18 | 0.797161 | #####    |
| LRRC14B brown  | 0.385898 | 1.14E-18 | 0.139074 | 0.002142 | 0.389441 | 5.17E-19 |
| LRRC7 brown    | 0.209192 | 3.37E-06 | 0.101771 | 0.025006 | 0.357665 | 4.41E-16 |
| LRRCC1 brown   | 0.342443 | 8.64E-15 | 0.272379 | 1.07E-09 | 0.540973 | 3.24E-38 |
| LSM12 brown    | 0.504893 | 9.80E-33 | 0.309175 | 3.34E-12 | 0.586275 | 4.14E-46 |
| LTF brown      | -0.24461 | 4.87E-08 | -0.07497 | 0.099139 | -0.3992  | 5.58E-20 |
| LUARIS brown   | -0.15128 | 0.000831 | -0.03366 | 0.459572 | -0.19446 | 1.61E-05 |
| LVRN brown     | 0.256008 | 1.07E-08 | 0.059449 | 0.191208 | 0.385797 | 1.16E-18 |
| LXN brown      | -0.22078 | 9.09E-07 | 0.031998 | 0.482029 | -0.27348 | 9.11E-10 |
| LY6H brown     | -0.2663  | 2.56E-09 | -0.14884 | 0.00101  | -0.32284 | 3.16E-13 |
| LYRM4-A5 brown | 0.312384 | 1.94E-12 | 0.13261  | 0.003435 | 0.299276 | 1.71E-11 |
| MAD2L1 brown   | 0.669964 | 1.77E-64 | 0.365023 | 9.87E-17 | 0.837913 | #####    |
| MAFTRR brown   | -0.22857 | 3.62E-07 | -0.12653 | 0.005263 | -0.27355 | 9.02E-10 |
| MAGEA11 brown  | 0.295105 | 3.35E-11 | 0.186755 | 3.49E-05 | 0.325065 | 2.13E-13 |
| MAGEB17 brown  | 0.208126 | 3.79E-06 | 0.047535 | 0.296148 | 0.245054 | 4.59E-08 |

|          |       |          |          |          |          |          |          |
|----------|-------|----------|----------|----------|----------|----------|----------|
| MAL2     | brown | 0.375084 | 1.20E-17 | 0.320685 | 4.62E-13 | 0.47371  | 1.69E-28 |
| MAL2-AS  | brown | 0.177035 | 8.86E-05 | 0.108627 | 0.016704 | 0.243565 | 5.57E-08 |
| MAMSTR   | brown | 0.358384 | 3.81E-16 | 0.107225 | 0.018171 | 0.397272 | 8.72E-20 |
| MAN1B1   | brown | 0.283153 | 2.15E-10 | 0.09724  | 0.03227  | 0.259273 | 6.85E-09 |
| MAP6D1   | brown | 0.538677 | 7.58E-38 | 0.138791 | 0.002188 | 0.535498 | 2.43E-37 |
| MAP7D2   | brown | 0.300673 | 1.36E-11 | 0.174309 | 0.000114 | 0.337122 | 2.35E-14 |
| 1-Mar    | brown | 0.378996 | 5.16E-18 | 0.189078 | 2.78E-05 | 0.273115 | 9.60E-10 |
| MASTL    | brown | 0.593087 | 2.09E-47 | 0.268418 | 1.89E-09 | 0.793297 | #####    |
| MC1R     | brown | -0.2296  | 3.19E-07 | -0.27242 | 1.06E-09 | -0.31115 | 2.39E-12 |
| MCM10    | brown | 0.736024 | 7.12E-84 | 0.2962   | 2.81E-11 | 0.915448 | #####    |
| MCM2     | brown | 0.614639 | 1.02E-51 | 0.141117 | 0.001837 | 0.691563 | 3.05E-70 |
| MCM4     | brown | 0.659733 | 6.50E-62 | 0.282333 | 2.44E-10 | 0.80863  | #####    |
| MCM5     | brown | 0.367406 | 6.03E-17 | -0.05782 | 0.203714 | 0.350338 | 1.88E-15 |
| MCM6     | brown | 0.663687 | 6.83E-63 | 0.274795 | 7.51E-10 | 0.795232 | #####    |
| MCM7     | brown | 0.496923 | 1.31E-31 | -0.00064 | 0.988711 | 0.576927 | 2.23E-44 |
| MCM8     | brown | 0.656153 | 4.86E-61 | 0.249261 | 2.65E-08 | 0.807794 | #####    |
| MCM8-AS  | brown | 0.190873 | 2.32E-05 | 0.024512 | 0.590226 | 0.202951 | 6.64E-06 |
| MED14OS  | brown | 0.274378 | 7.98E-10 | 0.15989  | 0.000408 | 0.353408 | 1.03E-15 |
| MED30    | brown | 0.465254 | 2.02E-27 | 0.174499 | 0.000112 | 0.578116 | 1.35E-44 |
| MEGF11   | brown | -0.16486 | 0.000266 | -0.08277 | 0.068563 | -0.24956 | 2.55E-08 |
| MEIOC    | brown | 0.426184 | 8.00E-23 | 0.101154 | 0.025903 | 0.536862 | 1.48E-37 |
| MELK     | brown | 0.740558 | 2.02E-85 | 0.314046 | 1.46E-12 | 0.876188 | #####    |
| MFSD2B   | brown | 0.464249 | 2.69E-27 | 0.163426 | 0.000301 | 0.488487 | 1.88E-30 |
| MFSD4B   | brown | 0.209785 | 3.16E-06 | 0.163142 | 0.000309 | 0.265326 | 2.94E-09 |
| MGLL     | brown | -0.39507 | 1.44E-19 | -0.04118 | 0.365443 | -0.49096 | 8.69E-31 |
| MGST1    | brown | 0.231596 | 2.50E-07 | 0.229456 | 3.25E-07 | 0.155527 | 0.000588 |
| MIA      | brown | -0.14411 | 0.001462 | -0.05703 | 0.209945 | -0.26369 | 3.70E-09 |
| MICB     | brown | 0.334742 | 3.66E-14 | 0.045592 | 0.31635  | 0.334196 | 4.05E-14 |
| MINDY1   | brown | -0.24738 | 3.39E-08 | -0.0733  | 0.106921 | -0.35749 | 4.56E-16 |
| MIR17HG  | brown | 0.423115 | 1.74E-22 | 0.103088 | 0.023179 | 0.480703 | 2.07E-29 |
| MIR4258  | brown | 0.255575 | 1.14E-08 | 0.010227 | 0.822257 | 0.339319 | 1.56E-14 |
| MIR4292  | brown | 0.31036  | 2.74E-12 | -0.00701 | 0.877589 | 0.383439 | 1.96E-18 |
| MIR4653  | brown | 0.171585 | 0.000146 | 0.142771 | 0.00162  | 0.285003 | 1.62E-10 |
| MIR4768  | brown | -0.26773 | 2.09E-09 | -0.11669 | 0.010109 | -0.354   | 9.16E-16 |
| MIR559   | brown | 0.212875 | 2.24E-06 | 0.127184 | 0.00503  | 0.269865 | 1.54E-09 |
| MIR570   | brown | 0.265946 | 2.69E-09 | 0.044198 | 0.331389 | 0.321054 | 4.33E-13 |
| MIR589   | brown | 0.356954 | 5.08E-16 | 0.109393 | 0.015946 | 0.39151  | 3.25E-19 |
| MIR659   | brown | 0.269212 | 1.69E-09 | 0.115033 | 0.011237 | 0.286867 | 1.22E-10 |
| MIR924HC | brown | 0.254813 | 1.26E-08 | 0.080374 | 0.077004 | 0.382942 | 2.18E-18 |
| MIS18A   | brown | 0.666366 | 1.45E-63 | 0.19824  | 1.09E-05 | 0.771148 | 9.07E-97 |
| MIS18BP1 | brown | 0.476542 | 7.27E-29 | 0.288318 | 9.73E-11 | 0.66512  | 2.99E-63 |
| MKI67    | brown | 0.605818 | 6.49E-50 | 0.196516 | 1.31E-05 | 0.75799  | 1.11E-91 |
| MMP17    | brown | -0.25974 | 6.42E-09 | -0.16469 | 0.00027  | -0.29011 | 7.36E-11 |
| MMP24OS  | brown | -0.25346 | 1.51E-08 | -0.16519 | 0.000259 | -0.46609 | 1.58E-27 |
| MMP8     | brown | 0.146296 | 0.001234 | 0.089112 | 0.049841 | 0.235775 | 1.49E-07 |
| MMS22L   | brown | 0.544082 | 1.02E-38 | 0.272433 | 1.06E-09 | 0.719222 | 2.06E-78 |
| MND1     | brown | 0.646647 | 8.90E-59 | 0.255653 | 1.12E-08 | 0.753169 | 6.77E-90 |
| MORC2-A  | brown | 0.261354 | 5.14E-09 | 0.052768 | 0.24609  | 0.258937 | 7.18E-09 |
| MPP6     | brown | 0.511522 | 1.08E-33 | 0.290368 | 7.07E-11 | 0.596001 | 5.70E-48 |
| MR1      | brown | -0.27546 | 6.80E-10 | -0.11076 | 0.014667 | -0.34939 | 2.27E-15 |
| MRPL33   | brown | 0.398374 | 6.76E-20 | 0.255803 | 1.10E-08 | 0.467114 | 1.18E-27 |
| MSH2     | brown | 0.5434   | 1.31E-38 | 0.312297 | 1.97E-12 | 0.707011 | 1.09E-74 |
| MSH4     | brown | 0.13383  | 0.003147 | 0.022997 | 0.613411 | 0.184909 | 4.18E-05 |
| MSL3P1   | brown | 0.2005   | 8.61E-06 | 0.11488  | 0.011347 | 0.201832 | 7.48E-06 |
| MSRA     | brown | -0.27652 | 5.82E-10 | -0.11666 | 0.010131 | -0.40156 | 3.23E-20 |
| MT1A     | brown | 0.266538 | 2.48E-09 | 0.152277 | 0.000767 | 0.191541 | 2.17E-05 |
| MT1G     | brown | 0.259729 | 6.43E-09 | 0.093184 | 0.040235 | 0.20004  | 9.04E-06 |
| MT1H     | brown | 0.32774  | 1.32E-13 | 0.163952 | 0.000288 | 0.3281   | 1.23E-13 |

|                      |       |          |          |          |          |          |          |
|----------------------|-------|----------|----------|----------|----------|----------|----------|
| MTBP                 | brown | 0.609188 | 1.35E-50 | 0.251302 | 2.02E-08 | 0.785048 | #####    |
| MTCL1                | brown | -0.26115 | 5.28E-09 | -0.11107 | 0.014392 | -0.2488  | 2.81E-08 |
| MTFR2                | brown | 0.73509  | 1.47E-83 | 0.285225 | 1.57E-10 | 0.857517 | #####    |
| MTHFD1L              | brown | 0.433353 | 1.27E-23 | 0.158057 | 0.000476 | 0.520997 | 4.23E-35 |
| MTHFD2               | brown | 0.584016 | 1.10E-45 | 0.259724 | 6.44E-09 | 0.660593 | 3.99E-62 |
| MTMR7                | brown | 0.32395  | 2.59E-13 | 0.121064 | 0.007605 | 0.392786 | 2.43E-19 |
| MTSS2                | brown | -0.3612  | 2.16E-16 | -0.10917 | 0.016167 | -0.34178 | 9.79E-15 |
| MUC2                 | brown | -0.11171 | 0.013835 | -0.0323  | 0.47796  | -0.23706 | 1.27E-07 |
| MVB12B               | brown | -0.23022 | 2.96E-07 | -0.11155 | 0.013971 | -0.2408  | 7.93E-08 |
| MYBL1                | brown | 0.533685 | 4.69E-37 | 0.209811 | 3.15E-06 | 0.70961  | 1.83E-75 |
| MYBL2                | brown | 0.650802 | 9.34E-60 | 0.193147 | 1.84E-05 | 0.735852 | 8.14E-84 |
| MYBPC2               | brown | -0.16445 | 0.000276 | -0.14386 | 0.001491 | -0.23242 | 2.26E-07 |
| MYH10                | brown | 0.019339 | 0.670948 | 0.051853 | 0.25438  | 0.264294 | 3.40E-09 |
| MYL3                 | brown | -0.2496  | 2.53E-08 | -0.01902 | 0.676032 | -0.24481 | 4.74E-08 |
| MYLIP                | brown | -0.26661 | 2.45E-09 | -0.07896 | 0.082378 | -0.26299 | 4.09E-09 |
| MYO18B               | brown | 0.123336 | 0.006537 | -0.01197 | 0.792652 | 0.115483 | 0.010921 |
| MYOM2                | brown | -0.28423 | 1.83E-10 | -0.13493 | 0.002906 | -0.29908 | 1.77E-11 |
| MYZAP                | brown | -0.13131 | 0.003769 | 0.108134 | 0.017207 | -0.16382 | 0.000291 |
| MZT1                 | brown | 0.432343 | 1.65E-23 | 0.328463 | 1.15E-13 | 0.607395 | 3.12E-50 |
| NACC2                | brown | -0.33564 | 3.10E-14 | -0.20209 | 7.27E-06 | -0.35673 | 5.32E-16 |
| NALCN                | brown | -0.2711  | 1.29E-09 | -0.17882 | 7.50E-05 | -0.30923 | 3.31E-12 |
| NATD1                | brown | -0.39757 | 8.14E-20 | -0.20521 | 5.21E-06 | -0.37971 | 4.42E-18 |
| NBPF20               | brown | 0.281907 | 2.60E-10 | 0.06818  | 0.133775 | 0.306735 | 5.03E-12 |
| NCAPD2               | brown | 0.621484 | 3.68E-53 | 0.221457 | 8.40E-07 | 0.770146 | 2.28E-96 |
| NCAPD3               | brown | 0.501786 | 2.71E-32 | 0.108892 | 0.016438 | 0.588053 | 1.91E-46 |
| NCAPG                | brown | 0.740551 | 2.04E-85 | 0.302615 | 9.93E-12 | 0.906054 | #####    |
| NCAPG2               | brown | 0.65252  | 3.64E-60 | 0.2407   | 8.04E-08 | 0.832851 | #####    |
| NCAPH                | brown | 0.71682  | 1.16E-77 | 0.264281 | 3.41E-09 | 0.860463 | #####    |
| NDC1                 | brown | 0.683393 | 5.29E-68 | 0.355088 | 7.38E-16 | 0.835936 | #####    |
| NDC80                | brown | 0.683375 | 5.35E-68 | 0.267168 | 2.26E-09 | 0.856327 | #####    |
| NEB                  | brown | 0.194846 | 1.55E-05 | 0.093052 | 0.040519 | 0.192702 | 1.93E-05 |
| NECTIN3              | brown | 0.237475 | 1.21E-07 | 0.138261 | 0.002276 | 0.36187  | 1.88E-16 |
| NEIL3                | brown | 0.73491  | 1.69E-83 | 0.238195 | 1.10E-07 | 0.863996 | #####    |
| NEK2                 | brown | 0.633547 | 8.68E-56 | 0.294243 | 3.84E-11 | 0.741288 | 1.13E-85 |
| NETO2                | brown | 0.239642 | 9.19E-08 | 0.146891 | 0.001178 | 0.320128 | 5.09E-13 |
| NHSL1                | brown | 0.141727 | 0.001754 | 0.177878 | 8.19E-05 | 0.15146  | 0.000819 |
| NIPAL2               | brown | -0.12503 | 0.00583  | 0.002572 | 0.954939 | -0.24702 | 3.56E-08 |
| NKX6-1               | brown | 0.114231 | 0.011821 | 0.006698 | 0.883033 | 0.17881  | 7.50E-05 |
| NMU                  | brown | 0.441958 | 1.31E-24 | 0.129704 | 0.004221 | 0.555246 | 1.42E-40 |
| NMUR2                | brown | -0.33591 | 2.95E-14 | -0.03124 | 0.492461 | -0.34438 | 5.97E-15 |
| NOX5                 | brown | -0.3327  | 5.34E-14 | -0.1308  | 0.003906 | -0.44245 | 1.15E-24 |
| NPIP8                | brown | 0.214659 | 1.83E-06 | -0.04629 | 0.30896  | 0.212892 | 2.24E-06 |
| NPM1                 | brown | 0.400354 | 4.27E-20 | 0.294699 | 3.57E-11 | 0.530166 | 1.67E-36 |
| NPW                  | brown | 0.352369 | 1.26E-15 | 0.063965 | 0.159576 | 0.306714 | 5.04E-12 |
| NR1D1                | brown | -0.32442 | 2.39E-13 | -0.23055 | 2.84E-07 | -0.40898 | 5.57E-21 |
| NR6A1                | brown | 0.335746 | 3.04E-14 | 0.130093 | 0.004107 | 0.404838 | 1.49E-20 |
| NRG2                 | brown | -0.204   | 5.94E-06 | -0.08541 | 0.06017  | -0.27222 | 1.09E-09 |
| NRM                  | brown | 0.17773  | 8.31E-05 | -0.02243 | 0.622196 | 0.277833 | 4.79E-10 |
| NT5DC2               | brown | 0.203937 | 5.97E-06 | -0.04523 | 0.320236 | 0.265189 | 3.00E-09 |
| NTS                  | brown | 0.177569 | 8.43E-05 | 0.102487 | 0.023998 | 0.238418 | 1.07E-07 |
| NUDCD1               | brown | 0.372747 | 1.97E-17 | 0.274028 | 8.40E-10 | 0.497046 | 1.26E-31 |
| NUF2                 | brown | 0.681807 | 1.41E-67 | 0.271703 | 1.18E-09 | 0.854709 | #####    |
| NUP210               | brown | 0.379229 | 4.91E-18 | 0.028122 | 0.536674 | 0.394724 | 1.56E-19 |
| NUSAP1               | brown | 0.671836 | 5.87E-65 | 0.249952 | 2.42E-08 | 0.848357 | #####    |
| NXPH4                | brown | 0.270539 | 1.40E-09 | 0.113122 | 0.012673 | 0.334068 | 4.15E-14 |
| OCIAD1- <del>L</del> | brown | 0.244358 | 5.03E-08 | 0.173967 | 0.000118 | 0.36836  | 4.94E-17 |
| ODC1                 | brown | 0.457195 | 2.01E-26 | 0.18154  | 5.79E-05 | 0.555534 | 1.27E-40 |
| OIP5                 | brown | 0.71684  | 1.14E-77 | 0.255349 | 1.17E-08 | 0.804922 | #####    |

|          |       |          |          |          |          |          |          |
|----------|-------|----------|----------|----------|----------|----------|----------|
| OIT3     | brown | 0.188915 | 2.82E-05 | 0.119264 | 0.00856  | 0.206991 | 4.29E-06 |
| OLAH     | brown | 0.196536 | 1.30E-05 | 0.149233 | 0.000979 | 0.2048   | 5.44E-06 |
| OPN1SW   | brown | 0.207924 | 3.88E-06 | 0.068829 | 0.130105 | 0.32851  | 1.14E-13 |
| OR1L8    | brown | -0.20764 | 4.00E-06 | -0.09463 | 0.037214 | -0.21677 | 1.44E-06 |
| OR2B6    | brown | 0.418679 | 5.25E-22 | 0.092479 | 0.041775 | 0.456064 | 2.76E-26 |
| OR7D2    | brown | 0.117834 | 0.009394 | 0.053792 | 0.237025 | 0.12172  | 0.007282 |
| ORC1     | brown | 0.735846 | 8.18E-84 | 0.230794 | 2.76E-07 | 0.801941 | #####    |
| ORC6     | brown | 0.584571 | 8.65E-46 | 0.196681 | 1.28E-05 | 0.719251 | 2.02E-78 |
| ORM1     | brown | -0.12326 | 0.006568 | -0.06233 | 0.170565 | -0.36161 | 1.99E-16 |
| ORM2     | brown | -0.13059 | 0.003967 | -0.04239 | 0.351609 | -0.34552 | 4.80E-15 |
| OSBPL10- | brown | 0.114157 | 0.011877 | 0.035497 | 0.435415 | 0.176177 | 9.60E-05 |
| OSBPL5   | brown | -0.45714 | 2.04E-26 | -0.23685 | 1.31E-07 | -0.47726 | 5.87E-29 |
| OSBPL7   | brown | -0.25107 | 2.08E-08 | -0.24814 | 3.07E-08 | -0.35378 | 9.56E-16 |
| OTUD6B   | brown | 0.456728 | 2.29E-26 | 0.343707 | 6.79E-15 | 0.638079 | 8.33E-57 |
| OTX1     | brown | 0.364803 | 1.03E-16 | 0.178614 | 7.64E-05 | 0.34614  | 4.26E-15 |
| OXCT1    | brown | 0.242966 | 6.01E-08 | 0.183069 | 5.00E-05 | 0.320578 | 4.70E-13 |
| P2RX4    | brown | -0.3386  | 1.78E-14 | -0.24855 | 2.91E-08 | -0.57646 | 2.70E-44 |
| P2RX5-TA | brown | 0.396478 | 1.05E-19 | 0.110084 | 0.015289 | 0.422971 | 1.80E-22 |
| PAK6     | brown | 0.417191 | 7.58E-22 | 0.161831 | 0.000346 | 0.390085 | 4.47E-19 |
| PAQR5    | brown | 0.315945 | 1.05E-12 | 0.246534 | 3.79E-08 | 0.281133 | 2.92E-10 |
| PARM1    | brown | -0.43512 | 8.01E-24 | -0.02553 | 0.574823 | -0.47491 | 1.18E-28 |
| PARPBP   | brown | 0.692168 | 2.07E-70 | 0.326906 | 1.53E-13 | 0.858736 | #####    |
| PAX6     | brown | 0.157459 | 0.000501 | 0.047391 | 0.297611 | 0.148033 | 0.001077 |
| PBK      | brown | 0.651964 | 4.94E-60 | 0.303513 | 8.57E-12 | 0.797397 | #####    |
| PBXIP1   | brown | -0.46162 | 5.73E-27 | -0.20185 | 7.46E-06 | -0.42008 | 3.71E-22 |
| PCLAF    | brown | 0.51119  | 1.21E-33 | 0.261502 | 5.03E-09 | 0.57235  | 1.50E-43 |
| PCNA     | brown | 0.61995  | 7.80E-53 | 0.275629 | 6.64E-10 | 0.716082 | 1.95E-77 |
| PCSK6    | brown | -0.14946 | 0.000962 | -0.01762 | 0.698638 | -0.21474 | 1.82E-06 |
| PDCL2    | brown | 0.348783 | 2.55E-15 | 0.120662 | 0.00781  | 0.41172  | 2.88E-21 |
| PDE3B    | brown | 0.229356 | 3.29E-07 | 0.190228 | 2.47E-05 | 0.369813 | 3.65E-17 |
| PDE4DIP  | brown | -0.04782 | 0.293287 | -0.02223 | 0.625301 | -0.19485 | 1.55E-05 |
| PDGFA    | brown | -0.3428  | 8.07E-15 | -0.14174 | 0.001753 | -0.30185 | 1.13E-11 |
| PDGFD    | brown | -0.3728  | 1.94E-17 | -0.01076 | 0.813159 | -0.32483 | 2.22E-13 |
| PDK1     | brown | 0.40662  | 9.79E-21 | 0.23695  | 1.29E-07 | 0.478586 | 3.93E-29 |
| PDK3     | brown | 0.251895 | 1.87E-08 | 0.203812 | 6.05E-06 | 0.268338 | 1.92E-09 |
| PDLIM4   | brown | -0.35777 | 4.31E-16 | -0.15921 | 0.000432 | -0.43906 | 2.84E-24 |
| PDPR     | brown | -0.20427 | 5.77E-06 | -0.11846 | 0.009023 | -0.17755 | 8.45E-05 |
| PDSS1    | brown | 0.694524 | 4.51E-71 | 0.249302 | 2.63E-08 | 0.684414 | 2.80E-68 |
| PEBP4    | brown | -0.17791 | 8.16E-05 | -0.18096 | 6.12E-05 | -0.27231 | 1.08E-09 |
| PET117   | brown | 0.509967 | 1.82E-33 | 0.201341 | 7.88E-06 | 0.468881 | 7.03E-28 |
| PEX6     | brown | -0.12342 | 0.006499 | -0.13056 | 0.003974 | -0.28233 | 2.44E-10 |
| PHF21B   | brown | -0.38478 | 1.46E-18 | -0.18492 | 4.18E-05 | -0.34756 | 3.23E-15 |
| PHF6     | brown | 0.272464 | 1.06E-09 | 0.250344 | 2.29E-08 | 0.48201  | 1.39E-29 |
| PHGDH    | brown | 0.307371 | 4.52E-12 | 0.12706  | 0.005073 | 0.353535 | 1.00E-15 |
| PHLDA3   | brown | -0.40833 | 6.51E-21 | -0.19199 | 2.07E-05 | -0.44564 | 4.86E-25 |
| PHOSPHC  | brown | 0.430382 | 2.74E-23 | 0.286959 | 1.20E-10 | 0.477607 | 5.28E-29 |
| PHYH     | brown | 0.280725 | 3.11E-10 | 0.125078 | 0.00581  | 0.288888 | 8.91E-11 |
| PHYHD1   | brown | -0.25244 | 1.73E-08 | -0.11668 | 0.01012  | -0.35897 | 3.39E-16 |
| PIF1     | brown | 0.564263 | 4.03E-42 | 0.010511 | 0.817407 | 0.624047 | 1.04E-53 |
| PIMREG   | brown | 0.674461 | 1.23E-65 | 0.243788 | 5.41E-08 | 0.828491 | #####    |
| PITX2    | brown | 0.11292  | 0.012833 | 0.074223 | 0.102545 | 0.121018 | 0.007629 |
| PIWIL2   | brown | -0.20232 | 7.10E-06 | -0.06543 | 0.150229 | -0.20447 | 5.64E-06 |
| PKD2L2   | brown | 0.146393 | 0.001225 | 0.116342 | 0.010339 | 0.17778  | 8.27E-05 |
| PKMYT1   | brown | 0.585185 | 6.63E-46 | 0.086328 | 0.057456 | 0.601028 | 5.88E-49 |
| PKN2-AS1 | brown | 0.211279 | 2.68E-06 | 0.090491 | 0.046393 | 0.310509 | 2.67E-12 |
| PLB1     | brown | -0.28235 | 2.43E-10 | -0.11565 | 0.010806 | -0.40223 | 2.76E-20 |
| PLCXD1   | brown | 0.366365 | 7.48E-17 | 0.109074 | 0.016258 | 0.393891 | 1.89E-19 |
| PLK1     | brown | 0.664733 | 3.74E-63 | 0.173635 | 0.000121 | 0.702815 | 1.88E-73 |

|          |       |          |          |          |          |          |          |
|----------|-------|----------|----------|----------|----------|----------|----------|
| PLK4     | brown | 0.565191 | 2.77E-42 | 0.25602  | 1.07E-08 | 0.690031 | 8.12E-70 |
| PLP2     | brown | 0.197592 | 1.17E-05 | 0.056821 | 0.211616 | 0.231607 | 2.50E-07 |
| PLPPR2   | brown | -0.29423 | 3.85E-11 | -0.26448 | 3.32E-09 | -0.30982 | 3.00E-12 |
| PLS3-AS1 | brown | 0.227823 | 3.95E-07 | 0.027758 | 0.541961 | 0.220997 | 8.87E-07 |
| PLXNA2   | brown | -0.2498  | 2.46E-08 | -0.08162 | 0.072504 | -0.36995 | 3.54E-17 |
| PLXNB3   | brown | -0.23134 | 2.58E-07 | -0.16459 | 0.000272 | -0.30139 | 1.21E-11 |
| PM20D2   | brown | 0.381256 | 3.16E-18 | 0.261352 | 5.14E-09 | 0.538273 | 8.79E-38 |
| PMS2P4   | brown | 0.351206 | 1.59E-15 | 0.105486 | 0.020148 | 0.396382 | 1.07E-19 |
| PNP      | brown | 0.302093 | 1.08E-11 | 0.160585 | 0.000385 | 0.293581 | 4.26E-11 |
| PNPLA4   | brown | -0.05551 | 0.222397 | 0.044074 | 0.33275  | -0.17381 | 0.00012  |
| PNPLA7   | brown | -0.35191 | 1.38E-15 | -0.36341 | 1.37E-16 | -0.51535 | 2.95E-34 |
| POC1A    | brown | 0.579592 | 7.24E-45 | 0.147207 | 0.001149 | 0.59065  | 6.14E-47 |
| POGLUT2  | brown | 0.094732 | 0.037019 | 0.175884 | 9.87E-05 | 0.331352 | 6.83E-14 |
| POLA2    | brown | 0.520052 | 5.87E-35 | 0.084828 | 0.061944 | 0.465605 | 1.82E-27 |
| POLD1    | brown | 0.443497 | 8.68E-25 | -0.06738 | 0.138409 | 0.421287 | 2.75E-22 |
| POLE     | brown | 0.413481 | 1.88E-21 | -0.06021 | 0.185589 | 0.491426 | 7.50E-31 |
| POLE2    | brown | 0.684008 | 3.61E-68 | 0.242794 | 6.15E-08 | 0.754251 | 2.71E-90 |
| POLQ     | brown | 0.721985 | 2.78E-79 | 0.250612 | 2.21E-08 | 0.87888  | #####    |
| POLR3G   | brown | 0.522608 | 2.41E-35 | 0.312799 | 1.81E-12 | 0.491315 | 7.76E-31 |
| PPA1     | brown | 0.21127  | 2.68E-06 | 0.222386 | 7.54E-07 | 0.227189 | 4.27E-07 |
| PPAT     | brown | 0.621126 | 4.39E-53 | 0.317005 | 8.77E-13 | 0.746824 | 1.31E-87 |
| PPIAL4A  | brown | 0.281693 | 2.68E-10 | 0.091726 | 0.043476 | 0.228021 | 3.86E-07 |
| PPIC     | brown | -0.22669 | 4.53E-07 | -0.06383 | 0.16049  | -0.2623  | 4.50E-09 |
| PPIF     | brown | 0.479897 | 2.64E-29 | 0.140061 | 0.001989 | 0.306281 | 5.42E-12 |
| PPP1R1B  | brown | -0.21521 | 1.72E-06 | -0.03216 | 0.47978  | -0.37124 | 2.70E-17 |
| PRC1     | brown | 0.674693 | 1.07E-65 | 0.191171 | 2.25E-05 | 0.821275 | #####    |
| PRELID2  | brown | 0.419731 | 4.05E-22 | 0.298023 | 2.10E-11 | 0.535709 | 2.25E-37 |
| PRELID3A | brown | 0.509906 | 1.86E-33 | 0.085559 | 0.059724 | 0.599614 | 1.12E-48 |
| PRICKLE2 | brown | -0.52863 | 2.89E-36 | -0.11497 | 0.01128  | -0.43011 | 2.93E-23 |
| PRIM1    | brown | 0.704725 | 5.19E-74 | 0.284593 | 1.73E-10 | 0.791458 | #####    |
| PRIM2    | brown | 0.542306 | 1.97E-38 | 0.26769  | 2.10E-09 | 0.717821 | 5.64E-78 |
| PRKAB1   | brown | -0.27824 | 4.50E-10 | -0.20752 | 4.05E-06 | -0.42983 | 3.16E-23 |
| PROCA1   | brown | 0.239175 | 9.75E-08 | -0.08724 | 0.054868 | 0.2872   | 1.16E-10 |
| PROSER2- | brown | 0.24258  | 6.32E-08 | 0.0495   | 0.276601 | 0.216731 | 1.45E-06 |
| PRPF18   | brown | 0.400873 | 3.79E-20 | 0.35756  | 4.50E-16 | 0.533524 | 4.98E-37 |
| PRR11    | brown | 0.69111  | 4.08E-70 | 0.263667 | 3.72E-09 | 0.844856 | #####    |
| PRR19    | brown | 0.439431 | 2.57E-24 | 0.13346  | 0.003232 | 0.391762 | 3.07E-19 |
| PRR26    | brown | -0.18496 | 4.16E-05 | -0.09427 | 0.037952 | -0.29088 | 6.52E-11 |
| PRRT3-AS | brown | 0.366528 | 7.23E-17 | 0.081967 | 0.071307 | 0.255029 | 1.22E-08 |
| PRSS22   | brown | -0.25926 | 6.86E-09 | -0.06162 | 0.175473 | -0.3252  | 2.08E-13 |
| PRSS56   | brown | -0.28206 | 2.54E-10 | -0.07674 | 0.091369 | -0.37455 | 1.34E-17 |
| PSAT1    | brown | 0.346901 | 3.67E-15 | 0.194261 | 1.65E-05 | 0.496891 | 1.32E-31 |
| PSIP1    | brown | 0.319394 | 5.79E-13 | 0.220731 | 9.14E-07 | 0.506313 | 6.14E-33 |
| PSMC3IP  | brown | 0.50487  | 9.88E-33 | 0.108346 | 0.016989 | 0.572474 | 1.42E-43 |
| PSMG3-A  | brown | -0.24785 | 3.19E-08 | -0.1894  | 2.69E-05 | -0.31616 | 1.02E-12 |
| PSRC1    | brown | 0.662795 | 1.14E-62 | 0.110422 | 0.014976 | 0.743364 | 2.15E-86 |
| PTCH1    | brown | -0.5188  | 9.04E-35 | -0.20763 | 4.01E-06 | -0.49746 | 1.10E-31 |
| PTCH2    | brown | -0.40697 | 9.00E-21 | -0.268   | 2.01E-09 | -0.42107 | 2.90E-22 |
| PTGER2   | brown | -0.42926 | 3.65E-23 | -0.10085 | 0.026356 | -0.38707 | 8.77E-19 |
| PTH1R    | brown | -0.39913 | 5.68E-20 | -0.11169 | 0.013848 | -0.37734 | 7.38E-18 |
| PTPRM    | brown | -0.29494 | 3.43E-11 | -0.08258 | 0.069206 | -0.25447 | 1.32E-08 |
| PTPRU    | brown | -0.26335 | 3.89E-09 | -0.08975 | 0.048221 | -0.25937 | 6.76E-09 |
| PTTG1    | brown | 0.59316  | 2.02E-47 | 0.214625 | 1.84E-06 | 0.679285 | 6.64E-67 |
| PTTG3P   | brown | 0.32551  | 1.96E-13 | 0.106694 | 0.018756 | 0.283506 | 2.04E-10 |
| PXMP2    | brown | 0.535273 | 2.64E-37 | 0.167202 | 0.000217 | 0.559826 | 2.36E-41 |
| PYROXD2  | brown | -0.23749 | 1.21E-07 | -0.27113 | 1.28E-09 | -0.35507 | 7.41E-16 |
| RAB32    | brown | 0.32539  | 2.01E-13 | 0.188616 | 2.91E-05 | 0.387922 | 7.26E-19 |
| RAB40AL  | brown | 0.190128 | 2.50E-05 | 0.098079 | 0.030803 | 0.29023  | 7.22E-11 |

|          |       |          |          |          |          |          |          |
|----------|-------|----------|----------|----------|----------|----------|----------|
| RAB6D    | brown | 0.193505 | 1.78E-05 | 0.068479 | 0.132075 | 0.201944 | 7.39E-06 |
| RAB9B    | brown | 0.037744 | 0.406897 | 0.101256 | 0.025753 | 0.231235 | 2.62E-07 |
| RAC3     | brown | 0.401189 | 3.52E-20 | 0.049747 | 0.274215 | 0.390463 | 4.11E-19 |
| RACGAP1  | brown | 0.709671 | 1.75E-75 | 0.245514 | 4.33E-08 | 0.860927 | #####    |
| RAD21-A  | brown | 0.327179 | 1.46E-13 | 0.124111 | 0.006204 | 0.382924 | 2.19E-18 |
| RAD51    | brown | 0.72234  | 2.14E-79 | 0.234166 | 1.82E-07 | 0.806023 | #####    |
| RAD51AP  | brown | 0.716748 | 1.22E-77 | 0.366498 | 7.27E-17 | 0.90382  | #####    |
| RAD54B   | brown | 0.451639 | 9.44E-26 | 0.229425 | 3.26E-07 | 0.534425 | 3.59E-37 |
| RAD54L   | brown | 0.729424 | 1.11E-81 | 0.194889 | 1.54E-05 | 0.852912 | #####    |
| RAD9B    | brown | 0.384996 | 1.39E-18 | 0.124514 | 0.006037 | 0.463697 | 3.16E-27 |
| RAET1K   | brown | 0.433398 | 1.25E-23 | 0.11004  | 0.01533  | 0.403785 | 1.91E-20 |
| RARA     | brown | -0.46603 | 1.61E-27 | -0.26509 | 3.04E-09 | -0.58747 | 2.46E-46 |
| RASD1    | brown | -0.40328 | 2.15E-20 | -0.1645  | 0.000275 | -0.46237 | 4.62E-27 |
| RBBP8    | brown | 0.271451 | 1.22E-09 | 0.165956 | 0.000242 | 0.384108 | 1.69E-18 |
| RBL1     | brown | 0.631714 | 2.21E-55 | 0.217441 | 1.34E-06 | 0.731241 | 2.81E-82 |
| RBM15-A  | brown | 0.341413 | 1.05E-14 | -0.01994 | 0.661285 | 0.255589 | 1.13E-08 |
| RBP2     | brown | 0.188232 | 3.02E-05 | 0.128811 | 0.004493 | 0.264998 | 3.08E-09 |
| RBPMS    | brown | -0.45486 | 3.86E-26 | -0.16926 | 0.00018  | -0.49505 | 2.38E-31 |
| RD3      | brown | 0.253101 | 1.59E-08 | 0.063136 | 0.165068 | 0.274915 | 7.38E-10 |
| RDM1     | brown | 0.663544 | 7.41E-63 | 0.204878 | 5.40E-06 | 0.668344 | 4.59E-64 |
| RECQL4   | brown | 0.468223 | 8.51E-28 | -0.01037 | 0.81979  | 0.502484 | 2.16E-32 |
| REEP4    | brown | 0.344805 | 5.50E-15 | -0.02827 | 0.534474 | 0.337895 | 2.04E-14 |
| RELT     | brown | 0.375275 | 1.15E-17 | 0.064837 | 0.153954 | 0.421612 | 2.53E-22 |
| REXO5    | brown | 0.443657 | 8.32E-25 | 0.071954 | 0.113518 | 0.319251 | 5.94E-13 |
| RFC3     | brown | 0.606073 | 5.77E-50 | 0.342174 | 9.09E-15 | 0.783052 | #####    |
| RFC4     | brown | 0.694692 | 4.04E-71 | 0.22589  | 4.98E-07 | 0.808159 | #####    |
| RFXAP    | brown | 0.429547 | 3.39E-23 | 0.199663 | 9.40E-06 | 0.485895 | 4.21E-30 |
| RGL1     | brown | -0.53703 | 1.39E-37 | -0.17125 | 0.000151 | -0.52827 | 3.28E-36 |
| RGPD8    | brown | 0.244638 | 4.85E-08 | 0.131717 | 0.003661 | 0.339256 | 1.58E-14 |
| RGS20    | brown | 0.053836 | 0.236646 | 0.143379 | 0.001546 | 0.156103 | 0.00056  |
| RGS9BP   | brown | 0.338384 | 1.86E-14 | 0.193292 | 1.82E-05 | 0.351331 | 1.55E-15 |
| RIPPLY3  | brown | 0.137157 | 0.002469 | 0.052999 | 0.244022 | 0.156706 | 0.000533 |
| RMI1     | brown | 0.33869  | 1.76E-14 | 0.261728 | 4.87E-09 | 0.434571 | 9.24E-24 |
| RMI2     | brown | 0.601216 | 5.40E-49 | 0.18597  | 3.77E-05 | 0.663853 | 6.20E-63 |
| RN7SL832 | brown | 0.354229 | 8.75E-16 | 0.090217 | 0.047061 | 0.366915 | 6.67E-17 |
| RNASEH1  | brown | 0.569125 | 5.62E-43 | 0.201429 | 7.80E-06 | 0.562004 | 9.94E-42 |
| RNASEH2  | brown | 0.512694 | 7.27E-34 | 0.0582   | 0.200719 | 0.512571 | 7.58E-34 |
| RNASEL   | brown | -0.22299 | 7.02E-07 | -0.02465 | 0.588152 | -0.2275  | 4.11E-07 |
| RNF122   | brown | -0.27265 | 1.03E-09 | -0.24358 | 5.56E-08 | -0.28322 | 2.13E-10 |
| RNFT2    | brown | 0.320454 | 4.81E-13 | -0.0973  | 0.03216  | 0.268215 | 1.95E-09 |
| RNU6-8   | brown | 0.293565 | 4.27E-11 | 0.017595 | 0.699112 | 0.301278 | 1.24E-11 |
| RNVU1-2  | brown | 0.330722 | 7.66E-14 | 0.092072 | 0.042688 | 0.27342  | 9.18E-10 |
| RNVU1-4  | brown | 0.179461 | 7.06E-05 | 0.050934 | 0.262913 | 0.186549 | 3.56E-05 |
| ROCK1P1  | brown | 0.300263 | 1.46E-11 | 0.094278 | 0.037938 | 0.423907 | 1.42E-22 |
| ROR2     | brown | -0.36154 | 2.01E-16 | -0.16169 | 0.00035  | -0.35058 | 1.80E-15 |
| RORC     | brown | -0.05964 | 0.189771 | -0.11519 | 0.011127 | -0.28635 | 1.32E-10 |
| RPA4     | brown | 0.249321 | 2.63E-08 | 0.073621 | 0.10537  | 0.303489 | 8.60E-12 |
| RPH3AL   | brown | -0.12205 | 0.007122 | -0.08917 | 0.049703 | -0.30371 | 8.29E-12 |
| RPL39L   | brown | 0.423127 | 1.73E-22 | 0.076383 | 0.092902 | 0.430765 | 2.48E-23 |
| RPP40    | brown | 0.604379 | 1.26E-49 | 0.284679 | 1.70E-10 | 0.508603 | 2.87E-33 |
| RPS10-NL | brown | 0.353091 | 1.10E-15 | 0.105643 | 0.019962 | 0.402521 | 2.58E-20 |
| RPS6KA2  | brown | -0.44312 | 9.61E-25 | -0.17406 | 0.000117 | -0.39677 | 9.79E-20 |
| RPS6KA2- | brown | 0.227557 | 4.08E-07 | 0.04957  | 0.27593  | 0.32824  | 1.20E-13 |
| RRM1     | brown | 0.540648 | 3.66E-38 | 0.253248 | 1.56E-08 | 0.669445 | 2.41E-64 |
| RRM2     | brown | 0.638556 | 6.49E-57 | 0.290662 | 6.75E-11 | 0.741639 | 8.57E-86 |
| RTKN2    | brown | 0.547342 | 2.97E-39 | 0.324655 | 2.29E-13 | 0.764063 | 5.49E-94 |
| RTN4RL1  | brown | -0.11183 | 0.013736 | -0.06969 | 0.125354 | -0.15932 | 0.000428 |
| RUNX1    | brown | -0.39343 | 2.10E-19 | -0.09647 | 0.033673 | -0.39181 | 3.03E-19 |

|          |       |          |          |          |          |          |          |
|----------|-------|----------|----------|----------|----------|----------|----------|
| RXFP1    | brown | -0.17833 | 7.86E-05 | -0.01668 | 0.713994 | -0.17226 | 0.000138 |
| SAMMSOI  | brown | 0.288808 | 9.02E-11 | 0.105045 | 0.020678 | 0.31449  | 1.35E-12 |
| SAP30    | brown | 0.358675 | 3.60E-16 | 0.162991 | 0.000313 | 0.353695 | 9.73E-16 |
| SAPCD2   | brown | 0.425191 | 1.03E-22 | 0.130561 | 0.003974 | 0.421014 | 2.94E-22 |
| SASS6    | brown | 0.645941 | 1.30E-58 | 0.304899 | 6.82E-12 | 0.801548 | #####    |
| SATB1    | brown | -0.38478 | 1.46E-18 | -0.13602 | 0.002684 | -0.3457  | 4.63E-15 |
| SBDSP1   | brown | 0.378796 | 5.39E-18 | 0.095992 | 0.034564 | 0.508102 | 3.39E-33 |
| SCARA3   | brown | -0.26046 | 5.81E-09 | -0.25029 | 2.31E-08 | -0.24218 | 6.65E-08 |
| SCARNA1  | brown | 0.315269 | 1.18E-12 | -0.00692 | 0.879099 | 0.244207 | 5.13E-08 |
| SCARNA2  | brown | 0.233429 | 2.00E-07 | -0.01329 | 0.770322 | 0.215024 | 1.76E-06 |
| SCD      | brown | 0.265491 | 2.87E-09 | 0.258222 | 7.92E-09 | 0.309684 | 3.07E-12 |
| SCLY     | brown | 0.442025 | 1.29E-24 | 0.03487  | 0.443562 | 0.361626 | 1.98E-16 |
| SCML2    | brown | 0.472208 | 2.64E-28 | 0.138642 | 0.002212 | 0.582201 | 2.39E-45 |
| SCRT1    | brown | 0.273771 | 8.72E-10 | 0.002302 | 0.959677 | 0.270546 | 1.39E-09 |
| SCUBE1   | brown | -0.34046 | 1.26E-14 | -0.16687 | 0.000223 | -0.38219 | 2.57E-18 |
| SEC14L2  | brown | -0.24544 | 4.37E-08 | -0.14514 | 0.00135  | -0.31264 | 1.86E-12 |
| SELENBP1 | brown | -0.11242 | 0.01324  | -0.11666 | 0.01013  | -0.313   | 1.75E-12 |
| SEMA3F   | brown | -0.2955  | 3.14E-11 | -0.11124 | 0.014241 | -0.30665 | 5.10E-12 |
| SEPTIN3  | brown | 0.351329 | 1.55E-15 | 0.032768 | 0.471545 | 0.396171 | 1.12E-19 |
| SERPINA1 | brown | -0.43076 | 2.48E-23 | -0.13849 | 0.002237 | -0.60525 | 8.43E-50 |
| SERPINA1 | brown | -0.39687 | 9.56E-20 | -0.12576 | 0.005545 | -0.55394 | 2.37E-40 |
| SERPINA3 | brown | -0.33577 | 3.03E-14 | -0.11038 | 0.015014 | -0.45541 | 3.31E-26 |
| SERPINA4 | brown | -0.31426 | 1.41E-12 | -0.09729 | 0.032186 | -0.4814  | 1.67E-29 |
| SERPINA5 | brown | -0.35697 | 5.07E-16 | -0.07062 | 0.120387 | -0.43272 | 1.50E-23 |
| SERPINB6 | brown | -0.3426  | 8.38E-15 | -0.18408 | 4.53E-05 | -0.41771 | 6.67E-22 |
| SEZ6L2   | brown | -0.18852 | 2.93E-05 | -0.09034 | 0.046753 | -0.20799 | 3.85E-06 |
| SFMBT1   | brown | 0.475623 | 9.57E-29 | 0.152783 | 0.000736 | 0.531361 | 1.09E-36 |
| SFXN3    | brown | -0.54176 | 2.42E-38 | -0.21383 | 2.01E-06 | -0.53092 | 1.27E-36 |
| SFXN5    | brown | 0.181012 | 6.09E-05 | -0.05371 | 0.23772  | 0.177203 | 8.73E-05 |
| SGO1     | brown | 0.740385 | 2.32E-85 | 0.293189 | 4.54E-11 | 0.903729 | #####    |
| SGO2     | brown | 0.656592 | 3.80E-61 | 0.400631 | 4.01E-20 | 0.848871 | #####    |
| SGTB     | brown | 0.218651 | 1.16E-06 | 0.226318 | 4.73E-07 | 0.440977 | 1.70E-24 |
| SH2D4B   | brown | 0.252313 | 1.76E-08 | 0.017371 | 0.702754 | 0.309171 | 3.34E-12 |
| SH3GL2   | brown | 0.177567 | 8.43E-05 | 0.02462  | 0.588591 | 0.263277 | 3.93E-09 |
| SH3RF3   | brown | -0.59998 | 9.48E-49 | -0.16706 | 0.000219 | -0.56602 | 1.99E-42 |
| SH3TC1   | brown | -0.24651 | 3.80E-08 | -0.14074 | 0.001891 | -0.42273 | 1.91E-22 |
| SHC2     | brown | -0.50912 | 2.41E-33 | -0.26239 | 4.45E-09 | -0.52238 | 2.61E-35 |
| SHCBP1   | brown | 0.591754 | 3.77E-47 | 0.220069 | 9.87E-07 | 0.622089 | 2.74E-53 |
| SHISA9   | brown | 0.128563 | 0.004571 | 0.046134 | 0.310627 | 0.182665 | 5.20E-05 |
| SHMT1    | brown | 0.324839 | 2.21E-13 | -0.00593 | 0.896443 | 0.258508 | 7.61E-09 |
| SHOC1    | brown | -0.25182 | 1.89E-08 | -0.09593 | 0.034688 | -0.2815  | 2.76E-10 |
| SIAE     | brown | -0.2348  | 1.69E-07 | -0.04245 | 0.350886 | -0.26713 | 2.28E-09 |
| SIX2     | brown | 0.225998 | 4.92E-07 | 0.086993 | 0.055554 | 0.261504 | 5.03E-09 |
| SKA1     | brown | 0.671995 | 5.34E-65 | 0.215521 | 1.66E-06 | 0.796022 | #####    |
| SKA3     | brown | 0.705674 | 2.72E-74 | 0.283762 | 1.96E-10 | 0.808415 | #####    |
| SKP2     | brown | 0.588629 | 1.49E-46 | 0.339388 | 1.54E-14 | 0.73123  | 2.84E-82 |
| SLC10A5  | brown | 0.264367 | 3.37E-09 | 0.144161 | 0.001456 | 0.321336 | 4.12E-13 |
| SLC12A9- | brown | 0.404094 | 1.78E-20 | 0.054177 | 0.233682 | 0.316496 | 9.58E-13 |
| SLC16A1  | brown | 0.272041 | 1.12E-09 | 0.118577 | 0.008952 | 0.37064  | 3.07E-17 |
| SLC16A10 | brown | 0.314261 | 1.41E-12 | 0.258609 | 7.51E-09 | 0.430172 | 2.89E-23 |
| SLC22A16 | brown | 0.213418 | 2.11E-06 | 0.109856 | 0.015503 | 0.330029 | 8.69E-14 |
| SLC22A23 | brown | -0.2823  | 2.45E-10 | -0.12466 | 0.005979 | -0.37496 | 1.23E-17 |
| SLC23A2  | brown | -0.27891 | 4.08E-10 | -0.16387 | 0.00029  | -0.24747 | 3.35E-08 |
| SLC25A19 | brown | 0.64815  | 3.95E-59 | 0.176788 | 9.07E-05 | 0.531011 | 1.23E-36 |
| SLC25A33 | brown | 0.422345 | 2.11E-22 | 0.141064 | 0.001845 | 0.379978 | 4.17E-18 |
| SLC26A4  | brown | -0.17413 | 0.000116 | 0.024325 | 0.593068 | -0.18075 | 6.25E-05 |
| SLC26A8  | brown | -0.1285  | 0.004592 | -0.10187 | 0.024871 | -0.27498 | 7.31E-10 |
| SLC27A1  | brown | -0.38135 | 3.10E-18 | -0.30179 | 1.14E-11 | -0.52077 | 4.57E-35 |

|          |       |          |          |          |          |          |          |
|----------|-------|----------|----------|----------|----------|----------|----------|
| SLC29A2  | brown | 0.432609 | 1.54E-23 | 0.047896 | 0.292483 | 0.408044 | 6.97E-21 |
| SLC35F4  | brown | 0.050865 | 0.263563 | -0.0133  | 0.770082 | 0.181978 | 5.55E-05 |
| SLC35G6  | brown | 0.216462 | 1.49E-06 | 0.000302 | 0.994701 | 0.215325 | 1.70E-06 |
| SLC36A4  | brown | 0.212518 | 2.33E-06 | 0.218017 | 1.25E-06 | 0.359258 | 3.20E-16 |
| SLC38A1  | brown | 0.408261 | 6.62E-21 | 0.244776 | 4.76E-08 | 0.56764  | 1.03E-42 |
| SLC38A2  | brown | 0.186229 | 3.68E-05 | 0.173195 | 0.000126 | 0.403039 | 2.28E-20 |
| SLC46A2  | brown | -0.38746 | 8.05E-19 | -0.18158 | 5.77E-05 | -0.49563 | 1.97E-31 |
| SLC46A3  | brown | -0.39278 | 2.44E-19 | -0.03675 | 0.419343 | -0.43667 | 5.33E-24 |
| SLC52A3  | brown | -0.17225 | 0.000138 | 0.008319 | 0.854997 | -0.30421 | 7.65E-12 |
| SLC5A10  | brown | -0.16411 | 0.000284 | -0.12239 | 0.006964 | -0.27654 | 5.81E-10 |
| SLC66A1L | brown | 0.259546 | 6.60E-09 | 0.075912 | 0.094942 | 0.285777 | 1.44E-10 |
| SLC7A8   | brown | -0.17964 | 6.94E-05 | -0.03796 | 0.404215 | -0.19663 | 1.29E-05 |
| SLFNL1   | brown | 0.342543 | 8.48E-15 | 0.01692  | 0.710126 | 0.391189 | 3.49E-19 |
| SLFNL1-A | brown | 0.30941  | 3.21E-12 | -0.04954 | 0.276173 | 0.314379 | 1.38E-12 |
| SLX1A    | brown | 0.164717 | 0.000269 | -0.00282 | 0.950523 | 0.171843 | 0.000143 |
| SMC1B    | brown | 0.41501  | 1.30E-21 | 0.122291 | 0.00701  | 0.475484 | 9.98E-29 |
| SMC2     | brown | 0.463503 | 3.34E-27 | 0.256743 | 9.69E-09 | 0.646477 | 9.75E-59 |
| SMC4     | brown | 0.555764 | 1.16E-40 | 0.276625 | 5.73E-10 | 0.740648 | 1.89E-85 |
| SMG1P6   | brown | 0.242601 | 6.30E-08 | 0.116498 | 0.010237 | 0.308064 | 4.03E-12 |
| SMIM22   | brown | -0.20198 | 7.36E-06 | -0.10986 | 0.015496 | -0.44996 | 1.50E-25 |
| SMS      | brown | 0.243256 | 5.79E-08 | 0.196301 | 1.33E-05 | 0.302645 | 9.89E-12 |
| SNED1    | brown | -0.57426 | 6.78E-44 | -0.25613 | 1.05E-08 | -0.49209 | 6.08E-31 |
| SNHG1    | brown | 0.395245 | 1.39E-19 | -0.00784 | 0.863219 | 0.466352 | 1.47E-27 |
| SNHG15   | brown | 0.4189   | 4.97E-22 | -0.12395 | 0.006272 | 0.328783 | 1.09E-13 |
| SNHG21   | brown | 0.40997  | 4.39E-21 | -0.07069 | 0.11999  | 0.36719  | 6.30E-17 |
| SNHG26   | brown | 0.335407 | 3.24E-14 | 0.066578 | 0.143177 | 0.355607 | 6.65E-16 |
| SNORA11  | brown | 0.358853 | 3.47E-16 | 0.128135 | 0.00471  | 0.42872  | 4.19E-23 |
| SNORA71  | brown | 0.337608 | 2.15E-14 | 0.092049 | 0.04274  | 0.322524 | 3.34E-13 |
| SNORA71  | brown | 0.330834 | 7.51E-14 | 0.015294 | 0.736898 | 0.354179 | 8.84E-16 |
| SNORA80  | brown | 0.207753 | 3.95E-06 | -0.02197 | 0.629379 | 0.217708 | 1.30E-06 |
| SNORA9B  | brown | 0.272878 | 9.94E-10 | 0.053977 | 0.235419 | 0.296979 | 2.48E-11 |
| SNORD14  | brown | 0.208515 | 3.64E-06 | 0.046339 | 0.308472 | 0.224416 | 5.93E-07 |
| SNORD3B  | brown | 0.175384 | 0.000103 | 0.02315  | 0.611053 | 0.190186 | 2.49E-05 |
| SNORD3B  | brown | 0.2154   | 1.69E-06 | -0.00211 | 0.963059 | 0.197962 | 1.12E-05 |
| SNORD72  | brown | 0.315753 | 1.09E-12 | 0.108038 | 0.017307 | 0.331298 | 6.90E-14 |
| SNORD83  | brown | 0.250897 | 2.13E-08 | 0.067202 | 0.139456 | 0.232386 | 2.27E-07 |
| SNORD91  | brown | 0.182777 | 5.14E-05 | 0.059201 | 0.19307  | 0.229085 | 3.40E-07 |
| SNURF    | brown | 0.190917 | 2.31E-05 | 0.185151 | 4.09E-05 | 0.247653 | 3.27E-08 |
| SNX16    | brown | 0.163097 | 0.00031  | 0.274724 | 7.59E-10 | 0.343441 | 7.14E-15 |
| SOD3     | brown | -0.33813 | 1.95E-14 | -0.13463 | 0.00297  | -0.31759 | 7.93E-13 |
| SOX9     | brown | -0.2984  | 1.97E-11 | -0.08616 | 0.057952 | -0.2923  | 5.22E-11 |
| SP2-AS1  | brown | 0.382041 | 2.66E-18 | 0.097072 | 0.032572 | 0.406486 | 1.01E-20 |
| SP8      | brown | 0.141526 | 0.001781 | 0.016965 | 0.709389 | 0.252926 | 1.62E-08 |
| SPAG5    | brown | 0.654681 | 1.10E-60 | 0.171564 | 0.000147 | 0.783254 | #####    |
| SPC24    | brown | 0.522793 | 2.26E-35 | 0.044282 | 0.330463 | 0.596078 | 5.51E-48 |
| SPC25    | brown | 0.693799 | 7.22E-71 | 0.292171 | 5.33E-11 | 0.874718 | #####    |
| SPDL1    | brown | 0.650259 | 1.26E-59 | 0.337531 | 2.18E-14 | 0.844172 | #####    |
| SPDYE6   | brown | 0.210873 | 2.80E-06 | -0.02633 | 0.563004 | 0.199139 | 9.93E-06 |
| SQLE     | brown | 0.21575  | 1.62E-06 | 0.382418 | 2.45E-18 | 0.320025 | 5.18E-13 |
| SRGAP2C  | brown | 0.291486 | 5.93E-11 | 0.202786 | 6.76E-06 | 0.485149 | 5.30E-30 |
| SRSF12   | brown | 0.34826  | 2.82E-15 | 0.182115 | 5.48E-05 | 0.523053 | 2.07E-35 |
| ST3GAL5  | brown | -0.3288  | 1.09E-13 | -0.20964 | 3.21E-06 | -0.36635 | 7.51E-17 |
| STAB2    | brown | -0.23396 | 1.87E-07 | -0.20303 | 6.58E-06 | -0.238   | 1.13E-07 |
| STAM-AS  | brown | 0.30792  | 4.12E-12 | 0.028932 | 0.525011 | 0.362913 | 1.52E-16 |
| STARD4   | brown | 0.22455  | 5.84E-07 | 0.32553  | 1.96E-13 | 0.430862 | 2.42E-23 |
| STC2     | brown | 0.134294 | 0.003043 | 0.117946 | 0.009326 | 0.149647 | 0.000947 |
| STEAP1B  | brown | 0.295319 | 3.23E-11 | 0.124293 | 0.006128 | 0.362142 | 1.78E-16 |
| STEAP3   | brown | -0.17307 | 0.000128 | -0.08491 | 0.061682 | -0.35805 | 4.08E-16 |

|           |       |          |          |          |          |          |          |
|-----------|-------|----------|----------|----------|----------|----------|----------|
| STIL      | brown | 0.637092 | 1.39E-56 | 0.215283 | 1.71E-06 | 0.717014 | 1.01E-77 |
| STING1    | brown | -0.46172 | 5.56E-27 | -0.04628 | 0.309112 | -0.51857 | 9.78E-35 |
| STK26     | brown | 0.209389 | 3.30E-06 | 0.150475 | 0.000887 | 0.351425 | 1.52E-15 |
| STK4-AS1  | brown | 0.359671 | 2.94E-16 | 0.144467 | 0.001422 | 0.306202 | 5.49E-12 |
| STMN1     | brown | 0.354908 | 7.65E-16 | 0.236188 | 1.42E-07 | 0.617767 | 2.25E-52 |
| STRIT1    | brown | -0.28821 | 9.89E-11 | -0.11057 | 0.014844 | -0.36246 | 1.67E-16 |
| SULF2     | brown | -0.45669 | 2.31E-26 | -0.09753 | 0.03176  | -0.38681 | 9.30E-19 |
| SULT2B1   | brown | -0.24772 | 3.24E-08 | 0.046742 | 0.304286 | -0.3546  | 8.13E-16 |
| SUMO4     | brown | 0.224166 | 6.11E-07 | 0.015654 | 0.730941 | 0.291932 | 5.53E-11 |
| SUSD2     | brown | -0.29436 | 3.77E-11 | -0.14622 | 0.001241 | -0.35702 | 5.02E-16 |
| SUSD6     | brown | -0.46214 | 4.94E-27 | -0.12593 | 0.005483 | -0.43572 | 6.85E-24 |
| SUV39H1   | brown | 0.512406 | 8.01E-34 | 0.024534 | 0.589899 | 0.454907 | 3.81E-26 |
| SUV39H2   | brown | 0.668554 | 4.06E-64 | 0.345352 | 4.95E-15 | 0.809242 | #####    |
| SYCE2     | brown | 0.483249 | 9.51E-30 | 0.023099 | 0.611836 | 0.488142 | 2.10E-30 |
| SYCP2     | brown | 0.146845 | 0.001182 | 0.042473 | 0.350629 | 0.239917 | 8.88E-08 |
| SYDE2     | brown | 0.216755 | 1.45E-06 | 0.14067  | 0.0019   | 0.299958 | 1.53E-11 |
| SYNGR4    | brown | 0.2799   | 3.52E-10 | 0.053746 | 0.237428 | 0.250169 | 2.35E-08 |
| SYP       | brown | 0.274323 | 8.05E-10 | 0.015583 | 0.732117 | 0.268992 | 1.74E-09 |
| TACC3     | brown | 0.60518  | 8.72E-50 | 0.11187  | 0.013699 | 0.714056 | 8.20E-77 |
| TACSTD2   | brown | -0.29276 | 4.85E-11 | -0.0687  | 0.130839 | -0.29175 | 5.69E-11 |
| TAF1A     | brown | 0.439595 | 2.46E-24 | 0.283583 | 2.02E-10 | 0.609238 | 1.32E-50 |
| TAF4B     | brown | 0.459619 | 1.01E-26 | 0.227251 | 4.23E-07 | 0.53478  | 3.16E-37 |
| TAF5      | brown | 0.628915 | 9.14E-55 | 0.236203 | 1.42E-07 | 0.749643 | 1.28E-88 |
| TAS2R14   | brown | 0.285235 | 1.57E-10 | 0.163957 | 0.000288 | 0.368921 | 4.39E-17 |
| TAS2R20   | brown | 0.259594 | 6.55E-09 | 0.03487  | 0.443572 | 0.360629 | 2.42E-16 |
| TAS2R31   | brown | 0.223529 | 6.59E-07 | 0.061764 | 0.174464 | 0.353191 | 1.07E-15 |
| TBC1D2    | brown | -0.25127 | 2.03E-08 | -0.10543 | 0.020209 | -0.42542 | 9.72E-23 |
| TBC1D31   | brown | 0.676709 | 3.17E-66 | 0.353833 | 9.46E-16 | 0.782297 | #####    |
| TBR1      | brown | 0.16064  | 0.000383 | 0.136591 | 0.002574 | 0.232935 | 2.12E-07 |
| TCAM1P    | brown | 0.306036 | 5.65E-12 | 0.093936 | 0.038645 | 0.372864 | 1.92E-17 |
| TCF19     | brown | 0.562368 | 8.60E-42 | 0.166005 | 0.000241 | 0.664753 | 3.69E-63 |
| TCF7      | brown | -0.43138 | 2.12E-23 | -0.08908 | 0.049924 | -0.47001 | 5.05E-28 |
| TCN2      | brown | -0.14404 | 0.00147  | -0.09191 | 0.043056 | -0.14391 | 0.001484 |
| TEDC2     | brown | 0.571053 | 2.55E-43 | 0.083598 | 0.065837 | 0.573131 | 1.08E-43 |
| TENM1     | brown | 0.128914 | 0.004461 | 0.071709 | 0.114755 | 0.294618 | 3.62E-11 |
| TERT      | brown | 0.414341 | 1.52E-21 | 0.04597  | 0.312351 | 0.382196 | 2.57E-18 |
| TESC      | brown | -0.31523 | 1.19E-12 | -0.14826 | 0.001058 | -0.46987 | 5.26E-28 |
| TEX19     | brown | 0.425487 | 9.55E-23 | 0.126246 | 0.005365 | 0.39656  | 1.03E-19 |
| TEX30     | brown | 0.533972 | 4.23E-37 | 0.281505 | 2.76E-10 | 0.628646 | 1.05E-54 |
| TEX53     | brown | -0.14961 | 0.00095  | -0.01099 | 0.809179 | -0.19178 | 2.12E-05 |
| TFRC      | brown | 0.498491 | 7.89E-32 | 0.36694  | 6.64E-17 | 0.565773 | 2.19E-42 |
| TGIF2-RAI | brown | 0.315486 | 1.14E-12 | 0.045295 | 0.319518 | 0.381137 | 3.24E-18 |
| TGM7      | brown | 0.189917 | 2.55E-05 | 0.001481 | 0.97405  | 0.236738 | 1.33E-07 |
| THOC3     | brown | 0.446587 | 3.77E-25 | 0.154855 | 0.000621 | 0.49654  | 1.48E-31 |
| THRA      | brown | -0.25034 | 2.29E-08 | -0.14813 | 0.001068 | -0.27693 | 5.48E-10 |
| TICRR     | brown | 0.695773 | 2.00E-71 | 0.17273  | 0.000132 | 0.803741 | #####    |
| TIGAR     | brown | 0.361363 | 2.09E-16 | 0.34709  | 3.54E-15 | 0.395908 | 1.19E-19 |
| TIGD3     | brown | 0.439953 | 2.24E-24 | 0.149299 | 0.000974 | 0.389401 | 5.22E-19 |
| TIMELESS  | brown | 0.641712 | 1.24E-57 | 0.234278 | 1.80E-07 | 0.805309 | #####    |
| TIMM8A    | brown | 0.730133 | 6.52E-82 | 0.28857  | 9.36E-11 | 0.734518 | 2.29E-83 |
| TIMP1     | brown | -0.40867 | 6.00E-21 | -0.18007 | 6.66E-05 | -0.42773 | 5.40E-23 |
| TINAGL1   | brown | -0.29668 | 2.60E-11 | -0.18372 | 4.70E-05 | -0.35059 | 1.79E-15 |
| TIPIN     | brown | 0.565335 | 2.62E-42 | 0.16888  | 0.000187 | 0.478846 | 3.63E-29 |
| TK1       | brown | 0.519608 | 6.84E-35 | 0.156226 | 0.000555 | 0.536593 | 1.63E-37 |
| TLDC2     | brown | 0.309971 | 2.92E-12 | 0.187413 | 3.27E-05 | 0.303336 | 8.82E-12 |
| TLE2      | brown | -0.35242 | 1.25E-15 | -0.20668 | 4.44E-06 | -0.36883 | 4.47E-17 |
| TLR5      | brown | -0.12402 | 0.006242 | -0.02971 | 0.513917 | -0.26797 | 2.02E-09 |
| TLX3      | brown | 0.216497 | 1.49E-06 | 0.074624 | 0.100698 | 0.250401 | 2.28E-08 |

|          |       |          |          |          |          |          |          |
|----------|-------|----------|----------|----------|----------|----------|----------|
| TMC4     | brown | -0.30601 | 5.67E-12 | -0.14737 | 0.001134 | -0.49449 | 2.84E-31 |
| TMC7     | brown | 0.181523 | 5.80E-05 | 0.209601 | 3.23E-06 | 0.225362 | 5.31E-07 |
| TMED3    | brown | -0.2162  | 1.54E-06 | -0.05872 | 0.196707 | -0.40926 | 5.21E-21 |
| TMEFF1   | brown | 0.233593 | 1.96E-07 | 0.061473 | 0.176505 | 0.437337 | 4.47E-24 |
| TMEM114  | brown | -0.38034 | 3.86E-18 | -0.17106 | 0.000153 | -0.43873 | 3.10E-24 |
| TMEM154  | brown | -0.26869 | 1.82E-09 | 0.005781 | 0.898952 | -0.36749 | 5.92E-17 |
| TMEM159  | brown | -0.13558 | 0.002772 | 0.051733 | 0.255488 | -0.24802 | 3.12E-08 |
| TMEM170  | brown | 0.296813 | 2.55E-11 | 0.204123 | 5.86E-06 | 0.468249 | 8.45E-28 |
| TMEM175  | brown | -0.32972 | 9.20E-14 | -0.36629 | 7.60E-17 | -0.50928 | 2.29E-33 |
| TMEM229  | brown | -0.23487 | 1.67E-07 | -0.14463 | 0.001404 | -0.45244 | 7.56E-26 |
| TMEM233  | brown | -0.25865 | 7.47E-09 | -0.06646 | 0.143896 | -0.22281 | 7.17E-07 |
| TMEM249  | brown | 0.290334 | 7.11E-11 | -0.05358 | 0.238918 | 0.31761  | 7.90E-13 |
| TMEM45B  | brown | -0.12026 | 0.00802  | 0.077669 | 0.087515 | -0.22303 | 6.99E-07 |
| TMEM63A  | brown | -0.29307 | 4.62E-11 | -0.1597  | 0.000415 | -0.45675 | 2.27E-26 |
| TMEM65   | brown | 0.285688 | 1.46E-10 | 0.378219 | 6.10E-18 | 0.49747  | 1.10E-31 |
| TMEM72-  | brown | -0.15919 | 0.000433 | -0.18841 | 2.97E-05 | -0.15461 | 0.000634 |
| TMEM97   | brown | 0.447968 | 2.59E-25 | 0.20732  | 4.14E-06 | 0.43399  | 1.07E-23 |
| TMPO     | brown | 0.47975  | 2.76E-29 | 0.273347 | 9.28E-10 | 0.713211 | 1.49E-76 |
| TMPO-AS  | brown | 0.58743  | 2.51E-46 | 0.168888 | 0.000186 | 0.670633 | 1.20E-64 |
| TMSB15B  | brown | 0.176601 | 9.23E-05 | 0.093079 | 0.040461 | 0.365671 | 8.63E-17 |
| TMSB15B- | brown | 0.073082 | 0.107956 | 0.107114 | 0.018292 | 0.228822 | 3.51E-07 |
| TNFRSF10 | brown | -0.1659  | 0.000243 | -0.12573 | 0.005559 | -0.28142 | 2.80E-10 |
| TNS2     | brown | -0.60046 | 7.60E-49 | -0.32982 | 9.04E-14 | -0.59849 | 1.86E-48 |
| TOM1     | brown | -0.48658 | 3.40E-30 | -0.27886 | 4.11E-10 | -0.6675  | 7.51E-64 |
| TOM1L2   | brown | -0.44233 | 1.19E-24 | -0.23066 | 2.81E-07 | -0.44718 | 3.21E-25 |
| TONSL    | brown | 0.536757 | 1.53E-37 | 0.022766 | 0.616975 | 0.619796 | 8.41E-53 |
| TOP2A    | brown | 0.616226 | 4.74E-52 | 0.307241 | 4.62E-12 | 0.814562 | #####    |
| TOPBP1   | brown | 0.600604 | 7.13E-49 | 0.220425 | 9.47E-07 | 0.777238 | 3.06E-99 |
| TP53INP2 | brown | -0.47407 | 1.52E-28 | -0.12747 | 0.004931 | -0.41709 | 7.77E-22 |
| TPBG     | brown | -0.394   | 1.85E-19 | -0.15373 | 0.000681 | -0.31478 | 1.29E-12 |
| TPCN1    | brown | -0.24527 | 4.47E-08 | -0.24715 | 3.49E-08 | -0.31941 | 5.77E-13 |
| TPD52    | brown | 0.433147 | 1.34E-23 | 0.3986   | 6.42E-20 | 0.542244 | 2.02E-38 |
| TPM3P9   | brown | 0.274819 | 7.48E-10 | -0.01805 | 0.691666 | 0.217577 | 1.32E-06 |
| TPST2    | brown | -0.40741 | 8.11E-21 | -0.26482 | 3.16E-09 | -0.46918 | 6.43E-28 |
| TPX2     | brown | 0.723568 | 8.72E-80 | 0.257841 | 8.34E-09 | 0.891215 | #####    |
| TRADD    | brown | -0.27498 | 7.31E-10 | -0.20176 | 7.53E-06 | -0.48107 | 1.85E-29 |
| TRAIP    | brown | 0.621492 | 3.67E-53 | -0.01582 | 0.728184 | 0.645043 | 2.10E-58 |
| TRAPPC3L | brown | 0.127974 | 0.004763 | 0.022656 | 0.618683 | 0.161297 | 0.000362 |
| TRDN     | brown | 0.211383 | 2.65E-06 | 0.063632 | 0.16177  | 0.225803 | 5.03E-07 |
| TRIM36   | brown | 0.16682  | 0.000224 | 0.12805  | 0.004737 | 0.206626 | 4.47E-06 |
| TRIM59   | brown | 0.436271 | 5.92E-24 | 0.180888 | 6.16E-05 | 0.483951 | 7.67E-30 |
| TRIP13   | brown | 0.64709  | 7.01E-59 | 0.296504 | 2.68E-11 | 0.724906 | 3.25E-80 |
| TRMT9B   | brown | -0.45496 | 3.75E-26 | -0.14081 | 0.001881 | -0.49239 | 5.53E-31 |
| TROAP    | brown | 0.596305 | 4.98E-48 | 0.059335 | 0.192064 | 0.6966   | 1.16E-71 |
| TRPV4    | brown | -0.21951 | 1.05E-06 | -0.15764 | 0.000493 | -0.34637 | 4.07E-15 |
| TSPAN11  | brown | -0.55004 | 1.06E-39 | -0.15989 | 0.000408 | -0.55413 | 2.20E-40 |
| TSPAN9   | brown | -0.48598 | 4.10E-30 | -0.22665 | 4.55E-07 | -0.47434 | 1.40E-28 |
| TTC32    | brown | 0.392609 | 2.53E-19 | 0.083489 | 0.066192 | 0.440429 | 1.97E-24 |
| TTF2     | brown | 0.564754 | 3.30E-42 | 0.189175 | 2.75E-05 | 0.671294 | 8.09E-65 |
| TTK      | brown | 0.717215 | 8.71E-78 | 0.313408 | 1.63E-12 | 0.905134 | #####    |
| TUBA1C   | brown | 0.55772  | 5.41E-41 | 0.183706 | 4.70E-05 | 0.627098 | 2.28E-54 |
| TUBA8    | brown | 0.395432 | 1.33E-19 | -0.06724 | 0.139232 | 0.31465  | 1.32E-12 |
| TXNDC12  | brown | 0.142066 | 0.00171  | 0.098866 | 0.029479 | 0.170486 | 0.000162 |
| TXNDC16  | brown | 0.261762 | 4.85E-09 | 0.187333 | 3.30E-05 | 0.415915 | 1.04E-21 |
| TXNIP    | brown | -0.29442 | 3.73E-11 | -0.12538 | 0.005691 | -0.29028 | 7.17E-11 |
| TYMS     | brown | 0.620008 | 7.58E-53 | 0.222946 | 7.06E-07 | 0.758649 | 6.31E-92 |
| TYMSOS   | brown | 0.499045 | 6.60E-32 | 0.12076  | 0.00776  | 0.491172 | 8.12E-31 |
| TYW1B    | brown | 0.168918 | 0.000186 | -0.03474 | 0.445285 | 0.172823 | 0.000131 |

|          |       |          |          |          |          |          |          |
|----------|-------|----------|----------|----------|----------|----------|----------|
| U2AF1    | brown | 0.230438 | 2.88E-07 | 0.025017 | 0.582588 | 0.291203 | 6.20E-11 |
| UBB      | brown | -0.26898 | 1.75E-09 | -0.08817 | 0.052307 | -0.32165 | 3.90E-13 |
| UBBP4    | brown | -0.22249 | 7.45E-07 | -0.12404 | 0.006234 | -0.35027 | 1.91E-15 |
| UBE2C    | brown | 0.602533 | 2.95E-49 | 0.177986 | 8.11E-05 | 0.737798 | 1.78E-84 |
| UBE2E1-A | brown | 0.274118 | 8.29E-10 | 0.098435 | 0.030198 | 0.415398 | 1.18E-21 |
| UBE2F-SC | brown | 0.244895 | 4.69E-08 | 0.039059 | 0.390731 | 0.300676 | 1.36E-11 |
| UBE2NL   | brown | 0.192082 | 2.05E-05 | 0.138796 | 0.002187 | 0.150987 | 0.000851 |
| UBE2S    | brown | 0.525302 | 9.38E-36 | 0.063097 | 0.165332 | 0.59071  | 5.98E-47 |
| UBE2T    | brown | 0.638882 | 5.48E-57 | 0.225649 | 5.13E-07 | 0.734231 | 2.85E-83 |
| UBE2V1   | brown | 0.522292 | 2.69E-35 | 0.287483 | 1.11E-10 | 0.634873 | 4.39E-56 |
| UBL7-AS1 | brown | 0.515673 | 2.64E-34 | 0.238412 | 1.07E-07 | 0.546491 | 4.10E-39 |
| UBQLNL   | brown | -0.26519 | 3.00E-09 | -0.20413 | 5.85E-06 | -0.34733 | 3.38E-15 |
| UBXN8    | brown | 0.323356 | 2.88E-13 | 0.105758 | 0.019827 | 0.256696 | 9.76E-09 |
| UHRF1    | brown | 0.436747 | 5.22E-24 | 0.143614 | 0.001519 | 0.467963 | 9.18E-28 |
| ULBP1    | brown | 0.38712  | 8.68E-19 | 0.13845  | 0.002244 | 0.399881 | 4.77E-20 |
| USHBP1   | brown | -0.22881 | 3.51E-07 | -0.14833 | 0.001052 | -0.26531 | 2.95E-09 |
| USP1     | brown | 0.549732 | 1.20E-39 | 0.350002 | 2.01E-15 | 0.773853 | 7.41E-98 |
| USP46-AS | brown | 0.320334 | 4.91E-13 | 0.206991 | 4.29E-06 | 0.313049 | 1.73E-12 |
| VAMP2    | brown | -0.33042 | 8.09E-14 | -0.23263 | 2.20E-07 | -0.37366 | 1.62E-17 |
| VPS13B-D | brown | 0.285699 | 1.46E-10 | 0.092959 | 0.040721 | 0.326946 | 1.52E-13 |
| VPS33B-D | brown | 0.356156 | 5.96E-16 | 0.101221 | 0.025805 | 0.346165 | 4.24E-15 |
| VRK1     | brown | 0.656986 | 3.05E-61 | 0.359074 | 3.32E-16 | 0.784029 | #####    |
| VSIG2    | brown | -0.11361 | 0.012291 | -0.04266 | 0.348473 | -0.19456 | 1.60E-05 |
| VWA1     | brown | -0.37303 | 1.85E-17 | -0.15073 | 0.000868 | -0.4864  | 3.61E-30 |
| WASF1    | brown | 0.232827 | 2.15E-07 | 0.155118 | 0.000608 | 0.375709 | 1.05E-17 |
| WDHD1    | brown | 0.691424 | 3.33E-70 | 0.285542 | 1.49E-10 | 0.879656 | #####    |
| WDR62    | brown | 0.530133 | 1.69E-36 | 0.047187 | 0.299693 | 0.568581 | 7.02E-43 |
| WDR76    | brown | 0.641316 | 1.52E-57 | 0.24223  | 6.61E-08 | 0.711947 | 3.60E-76 |
| WDR86    | brown | -0.40205 | 2.88E-20 | -0.22896 | 3.45E-07 | -0.40521 | 1.37E-20 |
| WDR88    | brown | 0.403304 | 2.14E-20 | 0.09724  | 0.032272 | 0.471735 | 3.04E-28 |
| WFDC10B  | brown | -0.13364 | 0.00319  | 0.02226  | 0.624825 | -0.20989 | 3.12E-06 |
| WFS1     | brown | -0.5034  | 1.60E-32 | -0.24533 | 4.43E-08 | -0.57041 | 3.33E-43 |
| WHRN     | brown | -0.48021 | 2.41E-29 | -0.28785 | 1.05E-10 | -0.51509 | 3.22E-34 |
| WIPI1    | brown | -0.23612 | 1.43E-07 | -0.01536 | 0.735865 | -0.24217 | 6.66E-08 |
| WNT4     | brown | -0.39555 | 1.29E-19 | -0.07343 | 0.106268 | -0.36189 | 1.87E-16 |
| XG       | brown | -0.31036 | 2.73E-12 | 0.005308 | 0.907186 | -0.46518 | 2.06E-27 |
| XKR9     | brown | 0.288619 | 9.29E-11 | 0.138565 | 0.002225 | 0.319212 | 5.98E-13 |
| XRCC2    | brown | 0.67633  | 3.99E-66 | 0.212589 | 2.31E-06 | 0.839945 | #####    |
| XRCC3    | brown | 0.433195 | 1.32E-23 | -0.01094 | 0.810124 | 0.408651 | 6.03E-21 |
| XRCC4    | brown | 0.461068 | 6.70E-27 | 0.321815 | 3.78E-13 | 0.568435 | 7.45E-43 |
| XYLB     | brown | 0.468643 | 7.53E-28 | 0.175491 | 0.000102 | 0.355343 | 7.01E-16 |
| YBX2     | brown | 0.407689 | 7.59E-21 | 0.102294 | 0.024267 | 0.498412 | 8.10E-32 |
| YY2      | brown | 0.261079 | 5.34E-09 | 0.114528 | 0.011602 | 0.345346 | 4.96E-15 |
| ZBTB10   | brown | 0.175436 | 0.000103 | 0.152493 | 0.000753 | 0.381976 | 2.70E-18 |
| ZBTB11-A | brown | 0.52511  | 1.00E-35 | 0.130287 | 0.004051 | 0.458027 | 1.59E-26 |
| ZBTB8B   | brown | 0.167887 | 0.000204 | 0.078181 | 0.085442 | 0.392383 | 2.66E-19 |
| ZDHHC13  | brown | 0.194067 | 1.68E-05 | 0.162875 | 0.000316 | 0.350679 | 1.76E-15 |
| ZDHHC23  | brown | 0.410355 | 4.01E-21 | 0.109291 | 0.016045 | 0.396858 | 9.60E-20 |
| ZFP69B   | brown | 0.446892 | 3.47E-25 | 0.195559 | 1.44E-05 | 0.538151 | 9.20E-38 |
| ZFYVE28  | brown | -0.36636 | 7.48E-17 | -0.26565 | 2.81E-09 | -0.5136  | 5.35E-34 |
| ZGRF1    | brown | 0.501506 | 2.97E-32 | 0.118379 | 0.009068 | 0.665383 | 2.57E-63 |
| ZHX1-C8c | brown | 0.46154  | 5.86E-27 | 0.150639 | 0.000875 | 0.416213 | 9.64E-22 |
| ZNF107   | brown | 0.190116 | 2.50E-05 | 0.177653 | 8.37E-05 | 0.348603 | 2.64E-15 |
| ZNF114   | brown | 0.3036   | 8.45E-12 | 0.11017  | 0.015208 | 0.367004 | 6.55E-17 |
| ZNF165   | brown | 0.473381 | 1.87E-28 | 0.177784 | 8.26E-05 | 0.441567 | 1.46E-24 |
| ZNF192P1 | brown | 0.276208 | 6.10E-10 | 0.004176 | 0.926921 | 0.369598 | 3.81E-17 |
| ZNF213   | brown | -0.29838 | 1.98E-11 | -0.32737 | 1.41E-13 | -0.47573 | 9.26E-29 |
| ZNF222   | brown | 0.3307   | 7.69E-14 | 0.134826 | 0.002928 | 0.432413 | 1.62E-23 |

|          |       |          |          |          |          |          |          |
|----------|-------|----------|----------|----------|----------|----------|----------|
| ZNF239   | brown | 0.344114 | 6.28E-15 | 0.037756 | 0.406739 | 0.321888 | 3.74E-13 |
| ZNF257   | brown | 0.158198 | 0.000471 | 0.099689 | 0.028148 | 0.215525 | 1.66E-06 |
| ZNF273   | brown | 0.328646 | 1.12E-13 | 0.170643 | 0.000159 | 0.462601 | 4.32E-27 |
| ZNF280B  | brown | 0.259117 | 7.00E-09 | 0.08611  | 0.058092 | 0.412691 | 2.28E-21 |
| ZNF280C  | brown | 0.391027 | 3.62E-19 | 0.259877 | 6.30E-09 | 0.566488 | 1.64E-42 |
| ZNF322   | brown | 0.382431 | 2.44E-18 | 0.312139 | 2.02E-12 | 0.554548 | 1.87E-40 |
| ZNF354C  | brown | 0.187865 | 3.13E-05 | 0.125425 | 0.005675 | 0.346992 | 3.61E-15 |
| ZNF367   | brown | 0.610421 | 7.54E-51 | 0.287839 | 1.05E-10 | 0.782757 | #####    |
| ZNF385A  | brown | -0.23546 | 1.55E-07 | -0.11056 | 0.014852 | -0.37479 | 1.27E-17 |
| ZNF485   | brown | 0.522504 | 2.50E-35 | 0.166445 | 0.000232 | 0.396772 | 9.79E-20 |
| ZNF492   | brown | 0.244079 | 5.21E-08 | 0.116892 | 0.009981 | 0.357666 | 4.41E-16 |
| ZNF503-A | brown | 0.15877  | 0.000448 | 0.209341 | 3.32E-06 | 0.158603 | 0.000455 |
| ZNF519   | brown | 0.443527 | 8.61E-25 | 0.132531 | 0.003455 | 0.664391 | 4.55E-63 |
| ZNF530   | brown | 0.51493  | 3.40E-34 | 0.039282 | 0.388031 | 0.566729 | 1.49E-42 |
| ZNF560   | brown | 0.130586 | 0.003967 | 0.016923 | 0.710081 | 0.166412 | 0.000232 |
| ZNF564   | brown | 0.319216 | 5.97E-13 | 0.037268 | 0.412835 | 0.350675 | 1.76E-15 |
| ZNF572   | brown | 0.175818 | 9.93E-05 | 0.15665  | 0.000535 | 0.309745 | 3.03E-12 |
| ZNF573   | brown | 0.347107 | 3.53E-15 | 0.176356 | 9.44E-05 | 0.364927 | 1.01E-16 |
| ZNF578   | brown | 0.135734 | 0.002741 | 0.041097 | 0.366469 | 0.214857 | 1.79E-06 |
| ZNF620   | brown | 0.495782 | 1.88E-31 | 0.102168 | 0.024443 | 0.54302  | 1.51E-38 |
| ZNF624   | brown | 0.118562 | 0.008961 | 0.167335 | 0.000214 | 0.259043 | 7.07E-09 |
| ZNF625   | brown | 0.281202 | 2.89E-10 | 0.164737 | 0.000269 | 0.401253 | 3.47E-20 |
| ZNF665   | brown | 0.260202 | 6.03E-09 | -0.02188 | 0.630676 | 0.301182 | 1.26E-11 |
| ZNF670   | brown | 0.470641 | 4.19E-28 | 0.295799 | 3.00E-11 | 0.614226 | 1.24E-51 |
| ZNF670-Z | brown | 0.520356 | 5.28E-35 | 0.191342 | 2.21E-05 | 0.592594 | 2.60E-47 |
| ZNF671   | brown | -0.19287 | 1.90E-05 | -0.19741 | 1.19E-05 | -0.28579 | 1.44E-10 |
| ZNF675   | brown | 0.412514 | 2.38E-21 | 0.304608 | 7.15E-12 | 0.556971 | 7.26E-41 |
| ZNF680   | brown | 0.322942 | 3.10E-13 | 0.28455  | 1.74E-10 | 0.477834 | 4.93E-29 |
| ZNF681   | brown | 0.282481 | 2.38E-10 | 0.157228 | 0.00051  | 0.35345  | 1.02E-15 |
| ZNF687-A | brown | 0.486869 | 3.12E-30 | 0.174286 | 0.000114 | 0.424217 | 1.32E-22 |
| ZNF695   | brown | 0.716504 | 1.45E-77 | 0.272117 | 1.11E-09 | 0.851102 | #####    |
| ZNF703   | brown | -0.39094 | 3.69E-19 | -0.10763 | 0.017735 | -0.40272 | 2.46E-20 |
| ZNF714   | brown | 0.317695 | 7.78E-13 | 0.149306 | 0.000973 | 0.42652  | 7.35E-23 |
| ZNF718   | brown | 0.218008 | 1.25E-06 | 0.055883 | 0.219271 | 0.300284 | 1.45E-11 |
| ZNF724   | brown | 0.489921 | 1.20E-30 | 0.189772 | 2.59E-05 | 0.624352 | 8.95E-54 |
| ZNF726   | brown | 0.167392 | 0.000213 | 0.036499 | 0.422558 | 0.274967 | 7.32E-10 |
| ZNF730   | brown | 0.178488 | 7.74E-05 | 0.122173 | 0.007065 | 0.322243 | 3.51E-13 |
| ZNF732   | brown | 0.041339 | 0.36365  | 0.016774 | 0.712522 | 0.118714 | 0.008873 |
| ZNF738   | brown | 0.247615 | 3.29E-08 | 0.096847 | 0.032979 | 0.375403 | 1.12E-17 |
| ZNF8-ERV | brown | 0.317926 | 7.48E-13 | 0.126896 | 0.005131 | 0.363786 | 1.27E-16 |
| ZNF829   | brown | 0.2478   | 3.21E-08 | 0.045158 | 0.320986 | 0.33519  | 3.37E-14 |
| ZNF85    | brown | 0.226465 | 4.65E-07 | 0.136429 | 0.002605 | 0.298191 | 2.04E-11 |
| ZNF850   | brown | 0.465804 | 1.72E-27 | 0.089166 | 0.049702 | 0.628498 | 1.13E-54 |
| ZNF876P  | brown | 0.153162 | 0.000714 | 0.09115  | 0.044818 | 0.251417 | 1.99E-08 |
| ZNF878   | brown | 0.426295 | 7.78E-23 | 0.222826 | 7.16E-07 | 0.510706 | 1.42E-33 |
| ZNF879   | brown | 0.367503 | 5.90E-17 | 0.155061 | 0.000611 | 0.453035 | 6.41E-26 |
| ZNF90    | brown | 0.099038 | 0.029197 | -0.05824 | 0.200435 | 0.128134 | 0.00471  |
| ZSCAN12  | brown | 0.296825 | 2.54E-11 | 0.115941 | 0.010607 | 0.448789 | 2.07E-25 |
| ZSCAN20  | brown | 0.369615 | 3.80E-17 | 0.068559 | 0.131624 | 0.458704 | 1.31E-26 |
| ZWINT    | brown | 0.668373 | 4.51E-64 | 0.210364 | 2.97E-06 | 0.794909 | #####    |
| ZYG11A   | brown | 0.349063 | 2.42E-15 | 0.061075 | 0.17933  | 0.41401  | 1.65E-21 |
