# Supplementary material for: A Risk Signature with Nine Stemness Index-Associated Genes for Predicting Survival of Patients with Uterine Corpus Endometrial Carcinoma
Source: Hindawi journal article supplement (doi:10.1155/2021/6653247), 2021-03-06
Supplement: f1 [file 6653247.f1.zip]

Supplementary table 2 Genes in the brown module related to overall survival in the training cohort of endometrial cancer patients.

| id         | HR       | HR.95L   | HR.95H   | pvalue   |
|------------|----------|----------|----------|----------|
| PDCL2      | 1.202536 | 1.105274 | 1.308357 | 1.82E-05 |
| NR6A1      | 1.497918 | 1.243566 | 1.804294 | 2.08E-05 |
| B3GAT2     | 1.444188 | 1.214839 | 1.716837 | 3.11E-05 |
| LINC01224  | 1.2672   | 1.133315 | 1.416903 | 3.23E-05 |
| C5orf34    | 1.567055 | 1.266587 | 1.9388   | 3.54E-05 |
| CDH18      | 1.156851 | 1.079208 | 1.240079 | 3.95E-05 |
| LOC22072   | 1.478773 | 1.215454 | 1.799138 | 9.22E-05 |
| AQP11      | 1.578798 | 1.248516 | 1.996453 | 0.000137 |
| TTK        | 1.482887 | 1.210756 | 1.816183 | 0.00014  |
| CD3EAP     | 1.75104  | 1.308351 | 2.343517 | 0.000165 |
| HMGN3-AS1  | 1.576976 | 1.24288  | 2.000879 | 0.000177 |
| GPR19      | 1.369988 | 1.161234 | 1.616269 | 0.00019  |
| RPP40      | 1.641607 | 1.265176 | 2.130037 | 0.000192 |
| CHCHD7     | 1.506059 | 1.213155 | 1.869683 | 0.000206 |
| PRELID3A   | 1.390015 | 1.167744 | 1.654593 | 0.000212 |
| LINC02068  | 1.352349 | 1.152633 | 1.58667  | 0.000214 |
| TLE2       | 0.734093 | 0.622527 | 0.865653 | 0.000238 |
| LINC01691  | 1.230556 | 1.100123 | 1.376453 | 0.000284 |
| TBC1D31    | 1.513559 | 1.209044 | 1.894769 | 0.000299 |
| SLC38A1    | 1.373259 | 1.154259 | 1.633809 | 0.000346 |
| DHCR24     | 1.44574  | 1.180622 | 1.770392 | 0.000362 |
| EPHA6      | 1.236362 | 1.09986  | 1.389806 | 0.000379 |
| LOC10192   | 1.521948 | 1.206299 | 1.920193 | 0.000398 |
| MMS22L     | 1.504274 | 1.195238 | 1.893213 | 0.000501 |
| ESRRB      | 1.248181 | 1.100942 | 1.415112 | 0.000537 |
| RPA4       | 1.457732 | 1.177126 | 1.805229 | 0.000551 |
| ZNF519     | 1.422962 | 1.164048 | 1.739466 | 0.000577 |
| MTBP       | 1.439596 | 1.167353 | 1.775331 | 0.000657 |
| ELOVL7     | 1.309103 | 1.12075  | 1.52911  | 0.000678 |
| CBWD2      | 1.433816 | 1.164299 | 1.765722 | 0.000694 |
| INHBE      | 1.231818 | 1.090565 | 1.391368 | 0.000793 |
| TRIP13     | 1.466232 | 1.172168 | 1.834068 | 0.000805 |
| CPS1       | 1.213536 | 1.083601 | 1.359052 | 0.00081  |
| TPX2       | 1.433649 | 1.161088 | 1.770193 | 0.000813 |
| ACTRT3     | 1.384616 | 1.1424   | 1.678187 | 0.00091  |
| MAL2       | 1.407533 | 1.149031 | 1.724191 | 0.000961 |
| ZNF503-AS1 | 1.297939 | 1.110406 | 1.517143 | 0.001056 |
| SLC36A4    | 1.305858 | 1.11238  | 1.532988 | 0.001108 |
| ATAD2      | 1.388576 | 1.138811 | 1.693121 | 0.001176 |
| TAS2R20    | 1.387968 | 1.138101 | 1.692693 | 0.001206 |
| LRATD2     | 1.40935  | 1.144978 | 1.734765 | 0.001207 |
| SHISA9     | 1.163002 | 1.061055 | 1.274744 | 0.001255 |
| EMBP1      | 1.336013 | 1.119858 | 1.59389  | 0.001295 |
| NIPAL2     | 1.518896 | 1.177225 | 1.959731 | 0.001305 |
| SUMO4      | 1.436449 | 1.151564 | 1.791813 | 0.001322 |
| MPP6       | 1.350304 | 1.122616 | 1.624173 | 0.001435 |
| PMS2P4     | 1.434309 | 1.148629 | 1.791041 | 0.001459 |
| FRMPD3     | 1.283904 | 1.099673 | 1.499    | 0.001566 |
| E2F1       | 1.367694 | 1.12636  | 1.660737 | 0.001571 |
| PRELID2    | 1.347726 | 1.119943 | 1.621838 | 0.001582 |
| PLP2       | 1.530939 | 1.174157 | 1.996134 | 0.001656 |
| ACAT2      | 1.415257 | 1.13878  | 1.758859 | 0.001737 |
| SPDL1      | 1.41983  | 1.139697 | 1.768818 | 0.001771 |
| CCNE1      | 1.286407 | 1.09826  | 1.506785 | 0.001798 |

|          |          |          |          |          |
|----------|----------|----------|----------|----------|
| CASC11   | 1.310741 | 1.105859 | 1.553582 | 0.001807 |
| ZNF85    | 1.410919 | 1.136085 | 1.752239 | 0.001844 |
| CEP72    | 1.468696 | 1.153068 | 1.87072  | 0.001847 |
| CORO2B   | 1.314083 | 1.106391 | 1.560762 | 0.001859 |
| LRRC7    | 1.255348 | 1.087818 | 1.448677 | 0.00186  |
| LINC0286 | 1.279248 | 1.095341 | 1.494031 | 0.001871 |
| ZNF695   | 1.344568 | 1.115689 | 1.620402 | 0.001872 |
| ASPM     | 1.354806 | 1.117722 | 1.642179 | 0.001975 |
| SNHG26   | 1.296694 | 1.099652 | 1.529044 | 0.002005 |
| ASNS     | 1.410717 | 1.133676 | 1.755461 | 0.002037 |
| EYS      | 1.455227 | 1.146571 | 1.846973 | 0.002039 |
| LYRM4-A  | 1.443288 | 1.142544 | 1.823194 | 0.002086 |
| RFC4     | 1.387346 | 1.126056 | 1.709266 | 0.002105 |
| RGS9BP   | 1.235987 | 1.079656 | 1.414954 | 0.002135 |
| FAM49B   | 1.411605 | 1.132669 | 1.759233 | 0.002147 |
| SLC16A10 | 1.25196  | 1.0845   | 1.445276 | 0.002161 |
| SYCP2    | 1.216643 | 1.073163 | 1.379307 | 0.002193 |
| RAD9B    | 1.403528 | 1.129694 | 1.743737 | 0.002205 |
| MFSD2B   | 1.307495 | 1.101032 | 1.552675 | 0.002231 |
| KCNMB3   | 1.343527 | 1.111667 | 1.623746 | 0.002249 |
| DUXAP8   | 1.190473 | 1.064263 | 1.331651 | 0.002294 |
| FAM72D   | 1.37154  | 1.119032 | 1.681025 | 0.00234  |
| SLC23A2  | 1.558073 | 1.170742 | 2.07355  | 0.002358 |
| MTHFD2   | 1.377961 | 1.120251 | 1.694956 | 0.002406 |
| DUXAP9   | 1.194354 | 1.064729 | 1.33976  | 0.002446 |
| HSPD1    | 1.419935 | 1.131736 | 1.781526 | 0.002453 |
| SH3GL2   | 1.187672 | 1.062517 | 1.327569 | 0.002467 |
| LINC0154 | 1.415035 | 1.12992  | 1.772094 | 0.002495 |
| DRP2     | 1.339529 | 1.10818  | 1.619176 | 0.002513 |
| MTFR2    | 1.37712  | 1.118996 | 1.694787 | 0.002514 |
| UBE2C    | 1.380483 | 1.119644 | 1.702089 | 0.002548 |
| SAMMSO1  | 1.242599 | 1.078899 | 1.431138 | 0.002582 |
| RBM15-A  | 1.503239 | 1.152129 | 1.961349 | 0.00267  |
| LACTB2   | 1.396265 | 1.122359 | 1.737015 | 0.002735 |
| TTC32    | 1.447623 | 1.135199 | 1.846032 | 0.002861 |
| ZNF273   | 1.416749 | 1.126428 | 1.781897 | 0.002906 |
| ZSCAN12  | 1.336902 | 1.10429  | 1.618512 | 0.00291  |
| PRRT3-AS | 1.283827 | 1.088541 | 1.514148 | 0.003001 |
| ESPL1    | 1.401658 | 1.121363 | 1.752015 | 0.003015 |
| DMBX1    | 1.155769 | 1.050313 | 1.271813 | 0.003022 |
| KLC3     | 1.21832  | 1.069248 | 1.388176 | 0.003023 |
| C5orf30  | 1.374189 | 1.113757 | 1.695517 | 0.003028 |
| FAM135B  | 1.239437 | 1.075463 | 1.428411 | 0.003029 |
| AURKA    | 1.374513 | 1.113213 | 1.697146 | 0.003107 |
| SNORA71  | 1.272051 | 1.084505 | 1.49203  | 0.003109 |
| TOPBP1   | 1.426963 | 1.127077 | 1.806642 | 0.003139 |
| CKAP2L   | 1.348893 | 1.105665 | 1.645627 | 0.003177 |
| CENPL    | 1.461574 | 1.135766 | 1.880844 | 0.003185 |
| BOLA3-A  | 1.285102 | 1.087586 | 1.518489 | 0.003218 |
| ZDHHC23  | 1.448119 | 1.131851 | 1.852761 | 0.003228 |
| CCDC150  | 1.285645 | 1.087427 | 1.519994 | 0.003271 |
| TLDC2    | 1.315321 | 1.094952 | 1.580042 | 0.003395 |
| KCNIP4   | 1.300111 | 1.090577 | 1.549903 | 0.003423 |
| TENM1    | 1.128436 | 1.040669 | 1.223606 | 0.003446 |
| KIF2C    | 1.36276  | 1.106446 | 1.67845  | 0.003597 |
| ZDHHC13  | 1.394029 | 1.114549 | 1.74359  | 0.003615 |
| CCDC9B   | 1.343191 | 1.10063  | 1.639208 | 0.00369  |
| CENPA    | 1.349316 | 1.102206 | 1.651828 | 0.003698 |

|          |          |          |          |          |
|----------|----------|----------|----------|----------|
| RDM1     | 1.319585 | 1.093667 | 1.592171 | 0.003798 |
| ZHX1-C8c | 1.388896 | 1.111356 | 1.735745 | 0.003874 |
| CCDC177  | 1.288004 | 1.084489 | 1.52971  | 0.003923 |
| SPDYE6   | 1.391752 | 1.111694 | 1.742364 | 0.003931 |
| H4C3     | 1.219495 | 1.065512 | 1.395731 | 0.00396  |
| POLQ     | 1.352369 | 1.101317 | 1.660651 | 0.003963 |
| PPAT     | 1.363617 | 1.103989 | 1.684301 | 0.004002 |
| SPC25    | 1.372856 | 1.106347 | 1.703565 | 0.004006 |
| KSR1     | 1.420583 | 1.117791 | 1.805397 | 0.004099 |
| ZNF354C  | 1.276296 | 1.080443 | 1.507652 | 0.004102 |
| FAM72A   | 1.330193 | 1.094462 | 1.616698 | 0.004145 |
| SPAG5    | 1.390124 | 1.109533 | 1.741675 | 0.004189 |
| NUF2     | 1.319387 | 1.091222 | 1.595259 | 0.004221 |
| GEN1     | 1.442337 | 1.12066  | 1.856348 | 0.004444 |
| RAB9B    | 1.261766 | 1.074813 | 1.481238 | 0.004487 |
| LOC10272 | 1.254793 | 1.072938 | 1.467471 | 0.004494 |
| MAP7D2   | 1.187745 | 1.054674 | 1.337605 | 0.00454  |
| HJURP    | 1.410785 | 1.112181 | 1.789561 | 0.004565 |
| GNG3     | 1.364007 | 1.100393 | 1.690773 | 0.004611 |
| SUV39H1  | 1.489436 | 1.130203 | 1.96285  | 0.004667 |
| RAB40AL  | 1.365597 | 1.100337 | 1.694803 | 0.004689 |
| SLC35F4  | 1.295586 | 1.08264  | 1.550417 | 0.004703 |
| ZNF192P1 | 1.25599  | 1.071719 | 1.471943 | 0.004869 |
| HDAC11-  | 1.459866 | 1.121675 | 1.900024 | 0.004893 |
| ZNF829   | 1.289734 | 1.08007  | 1.540097 | 0.00494  |
| ECE2     | 1.423144 | 1.112197 | 1.821024 | 0.005026 |
| ZNF850   | 1.345818 | 1.093603 | 1.656202 | 0.005031 |
| SRGAP2C  | 1.354453 | 1.095611 | 1.674448 | 0.00505  |
| MGST1    | 1.249541 | 1.069333 | 1.460118 | 0.005054 |
| COQ3     | 1.428858 | 1.113335 | 1.833802 | 0.005058 |
| SLC16A1  | 1.240334 | 1.066778 | 1.442127 | 0.005103 |
| DUXAP10  | 1.167142 | 1.04747  | 1.300485 | 0.005107 |
| BUB1     | 1.332214 | 1.089808 | 1.628537 | 0.005122 |
| CEBPZ    | 1.356688 | 1.095594 | 1.680004 | 0.005156 |
| B4GALT6  | 1.290288 | 1.079251 | 1.542591 | 0.005159 |
| PSAT1    | 1.276303 | 1.07536  | 1.514794 | 0.005251 |
| OSBPL7   | 1.552347 | 1.139413 | 2.114931 | 0.005318 |
| SLC25A19 | 1.428126 | 1.111507 | 1.834936 | 0.005326 |
| ARID3C   | 1.270789 | 1.073666 | 1.504104 | 0.005329 |
| FANCE    | 1.423097 | 1.110125 | 1.824303 | 0.005362 |
| MCM8     | 1.390627 | 1.102015 | 1.754825 | 0.005462 |
| LINC0106 | 1.24801  | 1.067347 | 1.459253 | 0.005489 |
| VPS33B-D | 1.417139 | 1.10772  | 1.812988 | 0.005538 |
| ACADM    | 1.321649 | 1.084592 | 1.610518 | 0.00569  |
| NECTIN3  | 1.226331 | 1.061068 | 1.417333 | 0.005735 |
| TRDN     | 1.222    | 1.059792 | 1.409037 | 0.005795 |
| KCNK6    | 0.774744 | 0.646184 | 0.928882 | 0.005836 |
| RAB32    | 1.339003 | 1.087758 | 1.648279 | 0.005899 |
| FAM216A  | 1.348475 | 1.089919 | 1.668366 | 0.00591  |
| LY6H     | 1.194702 | 1.052445 | 1.356188 | 0.005956 |
| ZNF107   | 1.404695 | 1.1022   | 1.790207 | 0.006025 |
| GGH      | 1.294846 | 1.076462 | 1.557534 | 0.006111 |
| PDSS1    | 1.416163 | 1.104034 | 1.816536 | 0.006162 |
| ZNF879   | 1.372503 | 1.094151 | 1.721667 | 0.006181 |
| TAS2R31  | 1.320583 | 1.082054 | 1.611694 | 0.006222 |
| UBE2E1-A | 1.295824 | 1.076209 | 1.560253 | 0.006236 |
| NTS      | 1.104351 | 1.028527 | 1.185764 | 0.006238 |
| WDR88    | 1.318683 | 1.081379 | 1.608061 | 0.006278 |

|          |          |          |          |          |
|----------|----------|----------|----------|----------|
| TPD52    | 1.381531 | 1.095336 | 1.742505 | 0.006356 |
| PLCXD1   | 1.3397   | 1.085692 | 1.653135 | 0.006401 |
| SNHG1    | 1.393104 | 1.097336 | 1.768591 | 0.006473 |
| SEPTIN3  | 1.216668 | 1.056462 | 1.401167 | 0.00648  |
| CBWD3    | 1.349684 | 1.087072 | 1.675739 | 0.006604 |
| FAM161A  | 1.34128  | 1.084995 | 1.658102 | 0.006648 |
| DIAPH3   | 1.296767 | 1.074649 | 1.564794 | 0.006708 |
| OTUD6B   | 1.325996 | 1.08096  | 1.626578 | 0.006794 |
| GUSBP2   | 1.330936 | 1.08174  | 1.637539 | 0.006876 |
| ZNF675   | 1.35544  | 1.086918 | 1.690301 | 0.006937 |
| ACTL8    | 1.121802 | 1.031961 | 1.219464 | 0.006962 |
| ZNF8-ERV | 1.42985  | 1.102774 | 1.853935 | 0.006972 |
| IQGAP3   | 1.391754 | 1.094566 | 1.769631 | 0.006992 |
| TMEM114  | 0.823845 | 0.715604 | 0.948458 | 0.007011 |
| CENPO    | 1.406975 | 1.097596 | 1.803559 | 0.007039 |
| ALMS1-IT | 1.278694 | 1.069217 | 1.529212 | 0.007078 |
| LOC10798 | 1.389944 | 1.092986 | 1.767584 | 0.007253 |
| C1orf112 | 1.35725  | 1.085782 | 1.696591 | 0.007301 |
| DMC1     | 0.800057 | 0.67971  | 0.941713 | 0.007318 |
| APLF     | 1.347878 | 1.083606 | 1.676602 | 0.007339 |
| MYBL1    | 1.319856 | 1.077418 | 1.616846 | 0.007361 |
| STK26    | 1.242283 | 1.059865 | 1.456098 | 0.007417 |
| LIN9     | 1.350933 | 1.083498 | 1.684379 | 0.00753  |
| DMRT1    | 1.148439 | 1.037523 | 1.271212 | 0.007567 |
| RPS6KA2- | 1.300148 | 1.072207 | 1.576546 | 0.007611 |
| LINC0204 | 1.260857 | 1.06349  | 1.494852 | 0.007615 |
| NMU      | 1.207546 | 1.0513   | 1.387014 | 0.007639 |
| RAC3     | 1.286157 | 1.068988 | 1.547444 | 0.007654 |
| ZNF730   | 1.175398 | 1.043377 | 1.324124 | 0.007849 |
| DLEU2    | 1.29925  | 1.070529 | 1.576839 | 0.008054 |
| SCLY     | 1.475558 | 1.106112 | 1.9684   | 0.008148 |
| TMSB15B  | 1.265096 | 1.061885 | 1.507196 | 0.008487 |
| FAM72B   | 1.279189 | 1.064745 | 1.536823 | 0.008537 |
| ASB9     | 1.253604 | 1.059186 | 1.483709 | 0.008571 |
| SPC24    | 1.361384 | 1.081602 | 1.713539 | 0.008582 |
| ZNF280C  | 1.379021 | 1.084706 | 1.753193 | 0.008696 |
| GTF3C2-A | 1.418939 | 1.091954 | 1.84384  | 0.00884  |
| PM20D2   | 1.310159 | 1.07025  | 1.603847 | 0.008848 |
| P2RX4    | 0.663102 | 0.48746  | 0.902031 | 0.008879 |
| SCML2    | 1.222181 | 1.051442 | 1.420644 | 0.008966 |
| FAM83D   | 1.287374 | 1.065192 | 1.555899 | 0.008966 |
| MIR570   | 1.289361 | 1.064838 | 1.561224 | 0.009227 |
| PHGDH    | 1.320049 | 1.070628 | 1.627577 | 0.009359 |
| TMEM65   | 1.320828 | 1.070767 | 1.629287 | 0.009364 |
| SLC66A1L | 1.111761 | 1.026372 | 1.204253 | 0.009366 |
| PDK1     | 1.33259  | 1.07299  | 1.654998 | 0.009398 |
| KIF14    | 1.31585  | 1.069087 | 1.61957  | 0.009585 |
| PRIM2    | 1.345086 | 1.074469 | 1.68386  | 0.009691 |
| C19orf57 | 1.230215 | 1.051094 | 1.439861 | 0.009862 |
| CIP2A    | 1.280615 | 1.061225 | 1.545361 | 0.009887 |
| ACSBG2   | 1.318881 | 1.068418 | 1.628058 | 0.01     |
| ARHGAP2  | 1.23023  | 1.050584 | 1.440594 | 0.010092 |
| MTMR7    | 1.355326 | 1.074902 | 1.708908 | 0.01015  |
| KNSTRN   | 1.375541 | 1.078555 | 1.754304 | 0.010189 |
| EME1     | 1.306762 | 1.064981 | 1.603434 | 0.010375 |
| CENPF    | 1.318739 | 1.067235 | 1.629512 | 0.010387 |
| ZNF239   | 1.345437 | 1.071892 | 1.688791 | 0.010509 |
| SLC22A16 | 1.135405 | 1.029972 | 1.251632 | 0.010653 |

|           |          |          |          |          |
|-----------|----------|----------|----------|----------|
| MAP6D1    | 1.313571 | 1.065417 | 1.619524 | 0.010676 |
| SLC10A5   | 1.381173 | 1.077807 | 1.769927 | 0.010707 |
| NDC80     | 1.285141 | 1.059816 | 1.558372 | 0.010753 |
| HLTF      | 1.315397 | 1.064848 | 1.624898 | 0.010998 |
| PIIF      | 1.373917 | 1.075259 | 1.755527 | 0.011079 |
| PAQR5     | 1.227205 | 1.047777 | 1.43736  | 0.011128 |
| TK1       | 1.405715 | 1.08057  | 1.828698 | 0.011171 |
| ZNF670-Z  | 1.346425 | 1.069762 | 1.694639 | 0.011258 |
| PHF6      | 1.34231  | 1.068972 | 1.685541 | 0.011274 |
| FAM72C    | 1.290033 | 1.059144 | 1.571255 | 0.011372 |
| KCNQ4     | 1.247192 | 1.051051 | 1.479937 | 0.011396 |
| DEPDC1    | 1.264569 | 1.054062 | 1.517116 | 0.011514 |
| UBE2V1    | 1.312419 | 1.062584 | 1.620996 | 0.011623 |
| LINC0112  | 1.288989 | 1.058107 | 1.57025  | 0.011708 |
| TMEM170   | 1.30112  | 1.059978 | 1.597122 | 0.011839 |
| RBP2      | 1.146675 | 1.030491 | 1.27596  | 0.012039 |
| CKAP2     | 1.323359 | 1.06286  | 1.647703 | 0.012244 |
| DEK       | 1.296308 | 1.05803  | 1.588248 | 0.01227  |
| FIGN      | 1.206115 | 1.041091 | 1.397296 | 0.012547 |
| MCM4      | 1.324363 | 1.062192 | 1.651243 | 0.012559 |
| RNVU1-4   | 1.291057 | 1.056246 | 1.578067 | 0.012622 |
| BRIP1     | 1.301714 | 1.058089 | 1.601434 | 0.01263  |
| KLF1      | 1.331826 | 1.062323 | 1.669701 | 0.012989 |
| KIF23     | 1.311959 | 1.058921 | 1.625464 | 0.013005 |
| CENPQ     | 1.319588 | 1.059694 | 1.643222 | 0.01321  |
| PHOSPHC   | 1.27327  | 1.051636 | 1.541613 | 0.013288 |
| OCIAD1-/- | 1.284626 | 1.053506 | 1.566449 | 0.013322 |
| ZNF573    | 1.460928 | 1.081993 | 1.972573 | 0.013348 |
| HESX1     | 1.303327 | 1.056394 | 1.607982 | 0.013442 |
| LOC10537  | 1.246427 | 1.046624 | 1.484373 | 0.013467 |
| LINC0061  | 1.33789  | 1.062017 | 1.685425 | 0.013486 |
| CCDC85C   | 1.323264 | 1.059416 | 1.652823 | 0.013562 |
| NEB       | 1.236416 | 1.044699 | 1.463317 | 0.013563 |
| LOC10013  | 1.33865  | 1.061789 | 1.687702 | 0.013621 |
| MSH2      | 1.341548 | 1.061838 | 1.694938 | 0.013781 |
| CADM2     | 1.158797 | 1.030494 | 1.303074 | 0.013828 |
| PROSER2-  | 1.260071 | 1.04792  | 1.515171 | 0.013988 |
| CHEK2     | 1.372686 | 1.06614  | 1.767372 | 0.014024 |
| TMPO-AS   | 1.301519 | 1.054561 | 1.60631  | 0.014095 |
| C18orf54  | 1.276321 | 1.050285 | 1.551003 | 0.014156 |
| PRR11     | 1.294752 | 1.053226 | 1.591665 | 0.014196 |
| SGO2      | 1.271069 | 1.048939 | 1.540237 | 0.014385 |
| FANCB     | 1.301939 | 1.053056 | 1.609644 | 0.014787 |
| CENPI     | 1.294416 | 1.051566 | 1.593351 | 0.014922 |
| LOC10192  | 1.347952 | 1.059829 | 1.714403 | 0.014951 |
| TMPO      | 1.305159 | 1.053026 | 1.617661 | 0.015027 |
| OPN1SW    | 1.304546 | 1.052887 | 1.616357 | 0.015046 |
| CDKN2C    | 1.231682 | 1.04121  | 1.456999 | 0.015053 |
| CDCA5     | 1.277845 | 1.048512 | 1.557338 | 0.015126 |
| MCM6      | 1.349682 | 1.059646 | 1.719104 | 0.015128 |
| ATAD5     | 1.3067   | 1.052871 | 1.621723 | 0.015203 |
| C9orf153  | 1.335422 | 1.057053 | 1.687099 | 0.015301 |
| SMC4      | 1.253967 | 1.044303 | 1.505726 | 0.015336 |
| XKR9      | 1.175497 | 1.031339 | 1.339806 | 0.015426 |
| TICRR     | 1.324631 | 1.054862 | 1.66339  | 0.015535 |
| CCN6      | 1.151877 | 1.027057 | 1.291866 | 0.015684 |
| DEPDC1B   | 1.25504  | 1.04377  | 1.509073 | 0.015715 |
| NCAPG2    | 1.313578 | 1.052558 | 1.639329 | 0.015815 |

|          |          |          |          |          |
|----------|----------|----------|----------|----------|
| ZNF492   | 1.155772 | 1.027441 | 1.300132 | 0.015919 |
| EXO1     | 1.281867 | 1.047205 | 1.569113 | 0.016081 |
| HMGAI    | 1.263068 | 1.044188 | 1.52783  | 0.016159 |
| TAF4B    | 1.266561 | 1.0447   | 1.535537 | 0.016171 |
| FNDC5    | 1.205954 | 1.035021 | 1.405116 | 0.016335 |
| LOC10050 | 1.336527 | 1.054573 | 1.693865 | 0.016417 |
| CHAC2    | 1.264922 | 1.043643 | 1.533118 | 0.016604 |
| BARD1    | 1.323461 | 1.052163 | 1.664714 | 0.016648 |
| DSCC1    | 1.287966 | 1.04698  | 1.58442  | 0.01665  |
| IPO9-AS1 | 1.333722 | 1.053614 | 1.688298 | 0.016659 |
| DSCR9    | 1.284547 | 1.046415 | 1.576872 | 0.016681 |
| YBX2     | 1.136201 | 1.023397 | 1.261439 | 0.01669  |
| CRABP1   | 1.096134 | 1.016759 | 1.181704 | 0.016696 |
| GAS6     | 1.224704 | 1.037185 | 1.446124 | 0.016823 |
| CYP1B1-A | 1.230225 | 1.03794  | 1.458131 | 0.016876 |
| KNTC1    | 1.357838 | 1.056315 | 1.745431 | 0.016959 |
| UBE2S    | 1.268359 | 1.043327 | 1.541929 | 0.017051 |
| DLGAP5   | 1.253644 | 1.040686 | 1.510181 | 0.017322 |
| EZH2     | 1.33456  | 1.05222  | 1.69266  | 0.017328 |
| PAX6     | 1.202471 | 1.032983 | 1.399769 | 0.017379 |
| SRSF12   | 1.221838 | 1.035722 | 1.441399 | 0.01749  |
| CDC48    | 1.310669 | 1.048473 | 1.638434 | 0.01752  |
| KCNE2    | 1.243925 | 1.038841 | 1.489496 | 0.017572 |
| TXNDC12  | 1.356244 | 1.054635 | 1.74411  | 0.017574 |
| LINC0140 | 1.328248 | 1.050223 | 1.679873 | 0.017841 |
| CIT      | 1.361042 | 1.054614 | 1.756505 | 0.017858 |
| CDC7     | 1.252745 | 1.039442 | 1.509819 | 0.017973 |
| ANKRD62  | 1.234922 | 1.036867 | 1.470808 | 0.017987 |
| GPR160   | 1.222586 | 1.034961 | 1.444226 | 0.018068 |
| CTF1     | 0.783533 | 0.639927 | 0.959366 | 0.018199 |
| GPSM2    | 1.299503 | 1.045321 | 1.615493 | 0.01832  |
| PDE3B    | 1.187671 | 1.029498 | 1.370146 | 0.018342 |
| CDC25C   | 1.316086 | 1.04751  | 1.653524 | 0.018347 |
| KBTBD11- | 1.204646 | 1.031706 | 1.406577 | 0.018536 |
| ZNF680   | 1.308847 | 1.045963 | 1.637801 | 0.018633 |
| SCRT1    | 1.255392 | 1.038647 | 1.517368 | 0.018668 |
| MCM7     | 1.361644 | 1.052792 | 1.761101 | 0.018676 |
| DDX47    | 1.320279 | 1.047357 | 1.664319 | 0.018694 |
| LCTL     | 1.321843 | 1.047553 | 1.667953 | 0.018699 |
| CDKN3    | 1.300478 | 1.0443   | 1.6195   | 0.018914 |
| MAL2-AS  | 1.28258  | 1.041497 | 1.579468 | 0.019145 |
| HMMR     | 1.246857 | 1.036545 | 1.49984  | 0.019243 |
| SASS6    | 1.29418  | 1.042086 | 1.607259 | 0.019653 |
| ASTL     | 1.200401 | 1.029569 | 1.399579 | 0.019701 |
| XRCC2    | 1.295301 | 1.042139 | 1.609963 | 0.019703 |
| MCM2     | 1.287525 | 1.040878 | 1.592617 | 0.019847 |
| ODC1     | 1.283089 | 1.040265 | 1.582595 | 0.019872 |
| VWA1     | 1.31862  | 1.044336 | 1.664941 | 0.020095 |
| SQLE     | 1.259961 | 1.036728 | 1.531261 | 0.020207 |
| AGFG2    | 1.366204 | 1.049833 | 1.777914 | 0.020243 |
| HROB     | 1.319323 | 1.044131 | 1.667044 | 0.020245 |
| ZBTB11-A | 1.410565 | 1.054725 | 1.886458 | 0.020385 |
| ANKRD36  | 1.294284 | 1.040559 | 1.609875 | 0.020499 |
| SLC29A2  | 1.312799 | 1.0427   | 1.652863 | 0.020572 |
| ZNF687-A | 1.32676  | 1.043986 | 1.686126 | 0.02078  |
| ZNF165   | 1.315697 | 1.042634 | 1.660275 | 0.020792 |
| PKD2L2   | 1.292068 | 1.039569 | 1.605896 | 0.020901 |
| NDC1     | 1.317963 | 1.042605 | 1.666044 | 0.02095  |

|          |          |          |          |          |
|----------|----------|----------|----------|----------|
| PTTG1    | 1.290327 | 1.039042 | 1.602384 | 0.021081 |
| FAAP24   | 1.277566 | 1.037408 | 1.57332  | 0.021131 |
| WASF1    | 1.194689 | 1.026787 | 1.390047 | 0.021332 |
| DSN1     | 1.324477 | 1.04263  | 1.682513 | 0.021339 |
| OTX1     | 1.208552 | 1.028506 | 1.420116 | 0.021366 |
| PRR19    | 1.294014 | 1.038978 | 1.611654 | 0.02137  |
| ZNF718   | 1.229122 | 1.031024 | 1.465282 | 0.021409 |
| MRPL33   | 1.255216 | 1.034018 | 1.523733 | 0.021552 |
| NPW      | 1.155004 | 1.02138  | 1.306109 | 0.021607 |
| TTF2     | 1.360894 | 1.045955 | 1.770661 | 0.02176  |
| ARL6IP6  | 1.286016 | 1.037176 | 1.594559 | 0.021869 |
| LVRN     | 1.214418 | 1.028521 | 1.433916 | 0.021922 |
| 1-Mar    | 1.313866 | 1.04012  | 1.659658 | 0.022024 |
| LOC10537 | 1.249575 | 1.032576 | 1.512178 | 0.022059 |
| LOC10192 | 1.296806 | 1.038057 | 1.620051 | 0.022085 |
| ELFN1-AS | 1.125493 | 1.017064 | 1.245481 | 0.022176 |
| HES5     | 0.856147 | 0.749405 | 0.978092 | 0.022254 |
| LINC0047 | 1.287363 | 1.036562 | 1.598847 | 0.022326 |
| HMGCS1   | 1.252921 | 1.031948 | 1.521211 | 0.022748 |
| ARSA     | 0.738666 | 0.569038 | 0.958859 | 0.022872 |
| NCAPD2   | 1.33351  | 1.040597 | 1.708874 | 0.02294  |
| POLR3G   | 1.272651 | 1.033804 | 1.566679 | 0.022999 |
| RBL1     | 1.336968 | 1.040778 | 1.717449 | 0.02304  |
| KIF18B   | 1.285016 | 1.034997 | 1.595431 | 0.023113 |
| DTX4     | 1.259367 | 1.032102 | 1.536674 | 0.023137 |
| MIS18BP1 | 1.267152 | 1.032849 | 1.554606 | 0.023219 |
| LOC10192 | 1.108963 | 1.014204 | 1.212577 | 0.023242 |
| SGO1     | 1.260054 | 1.031756 | 1.538869 | 0.023421 |
| BUB1B    | 1.256844 | 1.031388 | 1.531584 | 0.023429 |
| MED30    | 1.287069 | 1.034656 | 1.60106  | 0.023461 |
| SKA1     | 1.305583 | 1.03659  | 1.644379 | 0.023497 |
| LINC0187 | 1.141621 | 1.017957 | 1.280309 | 0.023561 |
| NXPH4    | 1.122309 | 1.015613 | 1.240213 | 0.023578 |
| LINC0063 | 1.330599 | 1.039021 | 1.704003 | 0.023619 |
| ZYG11A   | 1.140714 | 1.017717 | 1.278575 | 0.023718 |
| SNORD72  | 1.347732 | 1.039895 | 1.746696 | 0.024092 |
| CNNM3-L  | 1.296364 | 1.034207 | 1.624973 | 0.024338 |
| E2F5     | 1.285803 | 1.032828 | 1.60074  | 0.024517 |
| ANLN     | 1.240406 | 1.028011 | 1.496683 | 0.024559 |
| SKP2     | 1.308688 | 1.035065 | 1.654643 | 0.02458  |
| TROAP    | 1.289523 | 1.033072 | 1.609635 | 0.024604 |
| ZGRF1    | 1.302814 | 1.034409 | 1.640864 | 0.024616 |
| RPL39L   | 1.191185 | 1.022448 | 1.38777  | 0.02478  |
| DMRT3    | 1.102049 | 1.012342 | 1.199705 | 0.024889 |
| SNX16    | 1.293923 | 1.033008 | 1.620739 | 0.024923 |
| NEIL3    | 1.263413 | 1.0294   | 1.550623 | 0.025272 |
| KLHL14   | 1.212145 | 1.024117 | 1.434694 | 0.025282 |
| CDC20    | 1.290159 | 1.031883 | 1.613081 | 0.025395 |
| GINS4    | 1.244306 | 1.026973 | 1.507632 | 0.025634 |
| TMC7     | 1.285378 | 1.031032 | 1.602469 | 0.025641 |
| ECEL1    | 0.872997 | 0.774359 | 0.9842   | 0.026398 |
| RAD51AP  | 1.23414  | 1.02494  | 1.486039 | 0.026425 |
| ECT2     | 1.21562  | 1.023009 | 1.444496 | 0.026526 |
| KTN1-AS1 | 1.331735 | 1.033935 | 1.715308 | 0.026529 |
| DEPDC1-L | 1.257823 | 1.026994 | 1.540534 | 0.026592 |
| KLHL23   | 1.312378 | 1.031813 | 1.669234 | 0.026749 |
| PHYH     | 1.249889 | 1.025528 | 1.523335 | 0.027127 |
| RMI2     | 1.288581 | 1.02875  | 1.614039 | 0.027338 |

|          |          |          |          |          |
|----------|----------|----------|----------|----------|
| DARS2    | 1.318496 | 1.030824 | 1.686448 | 0.027686 |
| TIMM8A   | 1.282162 | 1.02708  | 1.600595 | 0.028089 |
| CCDC18   | 1.284442 | 1.026953 | 1.606492 | 0.02831  |
| SLC12A9- | 1.31511  | 1.029372 | 1.680165 | 0.02841  |
| MYBL2    | 1.273384 | 1.025845 | 1.580656 | 0.028428 |
| LRIF1    | 1.284906 | 1.026715 | 1.608026 | 0.028502 |
| SMC2     | 1.225228 | 1.021194 | 1.470029 | 0.028843 |
| NCAPG    | 1.250524 | 1.023221 | 1.528321 | 0.028945 |
| FBXO5    | 1.252346 | 1.023207 | 1.532797 | 0.029074 |
| OLAH     | 1.276721 | 1.024716 | 1.590701 | 0.029436 |
| PIMREG   | 1.252281 | 1.022647 | 1.533477 | 0.029507 |
| ZBTB8B   | 1.16056  | 1.014833 | 1.327213 | 0.029627 |
| NCAPH    | 1.273256 | 1.02382  | 1.583462 | 0.029888 |
| DHDH     | 1.195688 | 1.017414 | 1.4052   | 0.030042 |
| MVB12B   | 1.355651 | 1.029609 | 1.784939 | 0.03017  |
| ATP5MGL  | 1.347737 | 1.028979 | 1.765241 | 0.030201 |
| ID3      | 0.816177 | 0.679052 | 0.980993 | 0.03043  |
| VPS13B-D | 1.251598 | 1.021276 | 1.533864 | 0.030552 |
| SERPINA4 | 0.909256 | 0.834152 | 0.991122 | 0.030565 |
| FAR2     | 1.187528 | 1.016139 | 1.387824 | 0.030673 |
| RTKN2    | 1.256522 | 1.021186 | 1.546092 | 0.03092  |
| CCBE1    | 1.131843 | 1.01139  | 1.266642 | 0.030987 |
| ZNF90    | 1.135441 | 1.011659 | 1.274369 | 0.031022 |
| EVA1C    | 1.239101 | 1.019747 | 1.505639 | 0.03103  |
| ZNF322   | 1.262584 | 1.020922 | 1.561449 | 0.031478 |
| U2AF1    | 1.232168 | 1.018291 | 1.490968 | 0.031849 |
| ARNTL2   | 1.220257 | 1.017206 | 1.463841 | 0.032058 |
| SFMBT1   | 1.248021 | 1.018222 | 1.529681 | 0.032852 |
| CDK1     | 1.251189 | 1.018113 | 1.537622 | 0.033119 |
| TRAIP    | 1.299196 | 1.021164 | 1.652927 | 0.033136 |
| CEP295   | 1.289967 | 1.020042 | 1.63132  | 0.033534 |
| HMGB3    | 1.300522 | 1.02067  | 1.657105 | 0.033548 |
| FANCD2   | 1.293964 | 1.01991  | 1.641658 | 0.033811 |
| BRCA2    | 1.253267 | 1.016712 | 1.544859 | 0.034408 |
| ZNF681   | 1.263036 | 1.017141 | 1.568376 | 0.034531 |
| GMNN     | 1.256636 | 1.016502 | 1.553497 | 0.034752 |
| STIL     | 1.294228 | 1.018402 | 1.64476  | 0.034938 |
| AUNIP    | 1.242696 | 1.014974 | 1.521509 | 0.035389 |
| VRK1     | 1.262703 | 1.015667 | 1.569823 | 0.035736 |
| JPT1     | 1.337004 | 1.019376 | 1.753603 | 0.035849 |
| GPB1     | 0.82407  | 0.6878   | 0.987337 | 0.035892 |
| SNORA71  | 1.218725 | 1.013098 | 1.466089 | 0.035907 |
| BIRC5    | 1.2449   | 1.0135   | 1.529133 | 0.036819 |
| RGPD8    | 1.235711 | 1.012844 | 1.507616 | 0.037002 |
| DHCR7    | 1.37441  | 1.019121 | 1.853562 | 0.037152 |
| ZSCAN20  | 1.305598 | 1.015924 | 1.677867 | 0.037215 |
| KIF4A    | 1.248059 | 1.013106 | 1.537501 | 0.037313 |
| SYCE2    | 1.242007 | 1.012593 | 1.523399 | 0.037519 |
| DBF4     | 1.241966 | 1.012271 | 1.52378  | 0.037814 |
| ZNF578   | 1.182182 | 1.009372 | 1.384577 | 0.037926 |
| CENPW    | 1.210466 | 1.010432 | 1.450101 | 0.038212 |
| E2F8     | 1.233141 | 1.011292 | 1.503658 | 0.038366 |
| MAD2L1   | 1.217759 | 1.010606 | 1.467375 | 0.038372 |
| PSIP1    | 1.248504 | 1.011868 | 1.54048  | 0.038452 |
| CKS1B    | 1.211318 | 1.010215 | 1.452455 | 0.038482 |
| CBX3P2   | 1.209578 | 1.010105 | 1.448443 | 0.038517 |
| CCNF     | 1.285695 | 1.013349 | 1.631237 | 0.038532 |
| DNA2     | 1.24521  | 1.011537 | 1.532862 | 0.038627 |



|          |          |          |          |          |
|----------|----------|----------|----------|----------|
| DPF1     | 1.205418 | 1.00963  | 1.439172 | 0.038834 |
| SLC38A2  | 1.284736 | 1.012446 | 1.630256 | 0.039232 |
| CCNB1    | 1.276033 | 1.012012 | 1.608933 | 0.039311 |
| USP1     | 1.23325  | 1.010093 | 1.505708 | 0.039535 |
| CENPH    | 1.287538 | 1.011647 | 1.638668 | 0.039968 |
| IRAK1    | 1.292182 | 1.011415 | 1.650891 | 0.040289 |
| RAD54L   | 1.236756 | 1.009281 | 1.5155   | 0.040457 |
| ABCA7    | 0.800017 | 0.645919 | 0.99088  | 0.040964 |
| PRC1     | 1.258497 | 1.009417 | 1.569039 | 0.041027 |
| WDR62    | 1.289239 | 1.009686 | 1.646193 | 0.041624 |
| LOC10272 | 1.34011  | 1.011107 | 1.776166 | 0.041668 |
| SNHG21   | 1.254831 | 1.008537 | 1.561274 | 0.041729 |
| PLK1     | 1.260577 | 1.008337 | 1.575915 | 0.042068 |
| SNORA11  | 1.210508 | 1.006865 | 1.455339 | 0.042077 |
| TMEM229  | 0.808938 | 0.659287 | 0.992559 | 0.042202 |
| CEBPB-AS | 1.256178 | 1.007968 | 1.565509 | 0.042293 |
| NUDCD1   | 1.223026 | 1.006968 | 1.485442 | 0.042358 |
| TP53INP2 | 1.340458 | 1.00991  | 1.779197 | 0.042538 |
| MEGF11   | 1.132931 | 1.0041   | 1.278292 | 0.042725 |
| HBA1     | 0.881846 | 0.780792 | 0.995978 | 0.042882 |
| LRRC14B  | 1.155128 | 1.003883 | 1.329159 | 0.044    |
| PAK6     | 1.243981 | 1.005711 | 1.538703 | 0.044172 |
| CCNYL1   | 1.260603 | 1.006027 | 1.5796   | 0.044202 |
| C1D      | 1.232343 | 1.005305 | 1.510656 | 0.044337 |
| RACGAP1  | 1.251945 | 1.005369 | 1.558995 | 0.044663 |
| SLFNL1-A | 1.30308  | 1.005657 | 1.688466 | 0.045216 |
| TRIM59   | 1.301931 | 1.005424 | 1.68588  | 0.045393 |
| WDHD1    | 1.243679 | 1.004118 | 1.540395 | 0.045759 |
| MCM10    | 1.201758 | 1.003011 | 1.439886 | 0.04631  |
| IGF2BP3  | 1.106564 | 1.001577 | 1.222555 | 0.046486 |
| SLFNL1   | 1.235394 | 1.002942 | 1.521721 | 0.046857 |
| LOC10192 | 1.170269 | 1.002126 | 1.366625 | 0.046945 |
| KDM4D    | 1.29379  | 1.003225 | 1.668511 | 0.04717  |
| KCTD21-A | 1.232356 | 1.002521 | 1.514882 | 0.047271 |
| RNU6-8   | 1.179076 | 1.001576 | 1.388032 | 0.047829 |
| RAD21-AS | 1.196502 | 1.001614 | 1.42931  | 0.047957 |
| LBR      | 1.262155 | 1.001849 | 1.590096 | 0.048196 |
| GINS1    | 1.247648 | 1.001689 | 1.554002 | 0.048265 |
| TACC3    | 1.264211 | 1.001384 | 1.596019 | 0.048656 |
| DNAJB7   | 1.229834 | 1.001054 | 1.510898 | 0.048839 |
| ERCC6L   | 1.224733 | 1.000925 | 1.498584 | 0.04896  |
| TCAM1P   | 1.101064 | 1.000435 | 1.211815 | 0.04897  |
| KIF18A   | 1.217777 | 1.000663 | 1.481998 | 0.049231 |
| NKX6-1   | 1.101527 | 1.000147 | 1.213182 | 0.049651 |
