# Supplementary material for: A Risk Signature with Nine Stemness Index-Associated Genes for Predicting Survival of Patients with Uterine Corpus Endometrial Carcinoma
Source: J Oncol. 2021 Mar 6;2021:6653247. doi: 10.1155/2021/6653247 (PMC7960070; doi:10.1155/2021/6653247)
Supplement: Supplementary Materials — Supplementary Figure 1 shows the results of Kaplan–Meier survival analysis of the nine genes on overall survival in patients with endometrial cancer patients. Supplementary Table 1 lists all genes in the brown module. Supplementary Table 2 shows the genes in the brown module related to overall survival in the training cohort of endometrial cancer patients. [file 6653247.f1.zip]

Archive with 4 entries (3 files):
- Supplemenatry/
- Supplemenatry/Supplementary figure1.eps
- Supplemenatry/Supplementary_table 1.pdf
- Supplemenatry/Supplementary_table 2.pdf
